# Supplementary material for: Time-Course Lipidomics of Ornithine-Induced Severe Acute Pancreatitis Model Reveals the Free Fatty Acids Centered Lipids Dysregulation Characteristics
Source: Metabolites. 2023 Sep 5;13(9):993. doi: 10.3390/metabo13090993 (PMC10647642; doi:10.3390/metabo13090993)
Supplement: Supplementary file 1 [file metabolites-13-00993-s001.zip]

Archive with 6 entries (6 files):
- Supporting Information.pdf
- Table S3-Ion pairs detected in positive and negative model.xlsx
- Table S4-lipids in pancreas.xlsx
- Table S5-counts and proportion in pancreas.xlsx
- Table S6-lipids in serum.xlsx
- Table S7-counts and proportion in serum.xlsx
