# Supplementary material for: Time-Course Lipidomics of Ornithine-Induced Severe Acute Pancreatitis Model Reveals the Free Fatty Acids Centered Lipids Dysregulation Characteristics
Source: Metabolites. 2023 Sep 5;13(9):993. doi: 10.3390/metabo13090993 (PMC10647642; doi:10.3390/metabo13090993)
Supplement: Supplementary file 1 [file metabolites-13-00993-s001.zip › Table S3-Ion pairs detected in positive and negative model.xlsx]

## Sheet: PO
ID	Q1	Q3	RT	DP	CE
SM(d18:1/18:1)+H_d9_SPLASH.IS	738.663	184.2	6.34	80	43
SM(d18:1/14:0)+H	675.5	184.1	5.6	80	43
SM(d18:1/16:0)+H	703.6	184.1	6.23	80	43
SM(d18:1/18:0)+H	731.6	184.1	6.82	80	43
SM(d18:1/18:1)+H	729.6	184.1	6.37	80	43
SM(d18:1/20:0)+H	759.6	184.1	6.55	80	43
SM(d18:1/20:1)+H	757.6	184.1	6.18	80	43
SM(d18:1/22:0)+H	787.7	184.1	7	80	43
SM(d18:1/22:1)+H	785.7	184.1	6.66	80	43
SM(d18:1/24:0)+H	815.7	184.1	7.5	80	43
SM(d18:1/24:1)+H	813.7	184.1	7.24	80	43
SM(d18:1/26:0)+H	843.7	184.1	7.92	80	43
SM(d18:1/26:1)+H	841.7	184.1	7.64	80	43
CE(18:1)+NH4_d7_SPLASH.IS	675.68	369.4	10.22	80	25
CE(24:0)+NH4	754.7	369.4	11.59	80	25
CE(22:6)+NH4	714.6	369.4	10.21	80	25
CE(20:0)+NH4	698.7	369.4	11.05	80	25
CE(20:1)+NH4	696.7	369.4	9.1	80	25
CE(22:5)+NH4	716.6	369.4	10.34	80	25
CE(14:0)+NH4	614.6	369.4	10.42	80	25
CE(16:0)+NH4	642.6	369.4	10.64	80	25
CE(16:1)+NH4	640.6	369.4	10.41	80	25
CE(18:0)+NH4	670.6	369.4	10.89	80	25
CE(18:1)+NH4	668.6	369.4	10.62	80	25
CE(18:2)+NH4	666.6	369.4	10.45	80	25
CE(18:3)+NH4	664.6	369.4	10.26	80	25
CE(20:2)+NH4	694.6	369.4	10.65	80	25
CE(20:3)+NH4	692.6	369.4	10.47	80	25
CE(20:4)+NH4	690.6	369.4	10.31	80	25
CE(20:5)+NH4	688.6	369.4	10.14	80	25
CE(22:0)+NH4	726.7	369.4	11.37	80	25
CE(22:1)+NH4	724.7	369.4	11.07	80	25
CE(22:2)+NH4	722.7	369.4	10.86	80	25
CE(22:4)+NH4	718.6	369.4	10.51	80	25
CE(24:1)+NH4	752.7	369.4	11.31	80	25
CER(d18:1/14:0)+H	510.6	264.4	6.56	80	43
CER(d18:1/16:0)+H	538.6	264.4	7.13	80	43
CER(d18:1/18:0)+H	566.7	264.4	7.65	80	43
CER(d18:1/18:1)+H	564.8	264.4	6.87	80	43
CER(d18:1/20:0)+H	594.6	264.4	8.1	80	43
CER(d18:1/20:1)+H	592.6	264.4	7.41	80	43
CER(d18:1/22:0)+H	622.7	264.4	8.49	80	43
CER(d18:1/22:1)+H	620.7	264.4	7.88	80	43
CER(d18:1/24:0)+H	650.8	264.4	8.84	80	43
CER(d18:1/24:1)+H	648.8	264.4	8.27	80	43
CER(d18:1/26:0)+H	678.9	264.4	9.15	80	43
CER(d18:1/26:1)+H	676.9	264.4	8.62	80	43
CER(d18:0/14:0)+H	512.6	266.4	7.05	80	43
CER(d18:0/16:0)+H	540.6	266.4	7.33	80	43
CER(d18:0/18:0)+H	568.7	266.4	7.65	80	43
CER(d18:0/18:1)+H	566.8	266.4	7.35	80	43
CER(d18:0/20:0)+H	596.7	266.4	8.1	80	43
CER(d18:0/20:1)+H	594.4	266.4	7.85	80	43
CER(d18:0/22:0)+H	624.8	266.4	8.51	80	43
CER(d18:0/22:1)+H	620.4	266.4	8.21	80	43
CER(d18:0/24:0)+H	652.9	266.4	8.5	80	43
CER(d18:0/24:1)+H	650.9	266.4	8.26	80	43
CER(d18:0/26:0)+H	680.5	266.4	9.15	80	43
CER(d18:0/26:1)+H	678.5	266.4	8.83	80	43
GlcCer(d18:1/14:0)+H	672.5	264.4	5.87	80	43
GlcCer(d18:1/16:0)+H	700.7	264.4	6.49	80	43
GlcCer(d18:1/18:0)+H	728.8	264.4	7.05	80	43
GlcCer(d18:1/18:1)+H	726.7	264.4	6.88	80	43
GlcCer(d18:1/20:0)+H	756.7	264.4	7.55	80	43
GlcCer(d18:1/20:1)+H	754.7	264.4	7.41	80	43
GlcCer(d18:1/22:0)+H	784.9	264.4	7.99	80	43
GlcCer(d18:1/22:1)+H	782.8	264.4	7.87	80	43
GlcCer(d18:1/24:0)+H	812.9	264.4	8.38	80	43
GlcCer(d18:1/24:1)+H	810.9	264.4	7.99	80	43
GlcCer(d18:1/26:0)+H	840.9	264.4	8.72	80	43
GlcCer(d18:1/26:1)+H	838.9	264.4	8.36	80	43
GlcCer(d18:0/18:0)+H	730.8	266.4	7.79	80	43
GlcCer(d18:0/20:0)+H	758.7	266.4	7.85	80	43
GlcCer(d18:0/22:0)+H	786.9	266.4	8.13	80	43
GlcCer(d18:0/24:0)+H	814.9	266.4	8.38	80	43
GlcCer(d18:0/24:1)+H	812.9	266.4	8.28	80	43
GlcCer(d18:0/26:0)+H	842.9	266.4	8.7	80	43
GlcCer(d18:0/26:1)+H	840.9	266.4	8.62	80	43
LacCer(d18:1/14:0)+H	834.9	264.4	5.62	80	43
LacCer(d18:1/16:0)+H	862.9	264.4	6.48	80	43
LacCer(d18:1/18:0)+H	890.2	264.4	6.92	80	43
LacCer(d18:1/18:1)+H	888.2	264.4	6.63	80	43
LacCer(d18:1/20:0)+H	918.2	264.4	7.31	80	43
LacCer(d18:1/20:1)+H	916.2	264.4	7.23	80	43
LacCer(d18:1/22:0)+H	946.2	264.4	7.98	80	43
LacCer(d18:1/22:1)+H	944.2	264.4	7.61	80	43
LacCer(d18:1/24:0)+H	974.8	264.4	8.17	80	43
LacCer(d18:1/24:1)+H	972.9	264.4	7.74	80	43
LacCer(d18:1/26:0)+H	1002.4	264.4	8.53	80	43
LacCer(d18:1/26:1)+H	1000.4	264.4	8.16	80	38
LacCer(d18:0/18:0)+H	892.7	266.4	6.92	80	43
LacCer(d18:0/20:0)+H	920.7	266.4	8.59	80	43
LacCer(d18:0/22:0)+H	948.7	266.4	9.73	80	43
LacCer(d18:0/24:0)+H	976.8	266.4	9.97	80	43
LacCer(d18:0/24:1)+H	974.7	266.4	7.76	80	43
LacCer(d18:0/26:0)+H	1004.9	266.4	10.12	80	43
LacCer(d18:0/26:1)+H	1002.9	266.4	9.27	80	43
PE(15:0_18:1-d7)-H_SPLASH.IS	711.6	570.5	6.76	80	50
PE(P-16:0_14:0)+H	648.5	285.3	6.75	80	50
PE(P-16:0_15:0)+H	662.5	299.3	7.05	80	50
PE(P-16:0_16:0)+H	676.5	313.3	7.27	80	50
PE(P-16:0_16:1)+H	674.5	311.3	6.85	80	50
PE(P-16:0_17:0)+H	690.5	327.3	7.31	80	50
PE(P-16:0_18:0)+H	704.5	341.3	7.35	80	50
PE(P-16:0_18:1)+H	702.5	339.3	7.36	80	50
PE(P-16:0_18:2)+H	700.5	337.3	6.97	80	50
PE(P-16:0_18:3)+H	698.5	335.3	6.62	80	50
PE(P-16:0_19:0)+H	718.5	355.3	7.59	80	50
PE(P-16:0_20:0)+H	732.5	369.3	7.78	80	50
PE(P-16:0_20:1)+H	730.5	367.3	7.79	80	50
PE(P-16:0_20:2)+H	728.5	365.3	7.47	80	50
PE(P-16:0_20:3)+H	726.5	363.3	7.12	80	50
PE(P-16:0_20:4)+H	724.5	361.3	6.93	80	50
PE(P-16:0_20:5)+H	722.5	359.3	6.59	80	50
PE(P-16:0_22:4)+H	752.5	389.3	7.28	80	50
PE(P-16:0_22:5)+H	750.5	387.3	7.06	80	50
PE(P-16:0_22:6)+H	748.5	385.3	6.8	80	50
PE(P-16:1_14:0)+H	646.6	285.3	8.13	80	50
PE(P-16:1_15:0)+H	660.6	299.3	8.16	80	50
PE(P-16:1_16:0)+H	674.6	313.3	8.63	80	50
PE(P-16:1_16:1)+H	672.6	311.3	8.48	80	50
PE(P-16:1_17:0)+H	688.6	327.3	6.68	80	50
PE(P-16:1_18:0)+H	702.6	341.3	6.78	80	50
PE(P-16:1_18:1)+H	700.6	339.3	6.98	80	50
PE(P-16:1_18:2)+H	698.6	337.3	6.75	80	50
PE(P-16:1_18:3)+H	696.6	335.3	6.55	80	50
PE(P-16:1_19:0)+H	716.6	355.3	7.45	80	50
PE(P-16:1_20:0)+H	730.6	369.3	7.65	80	50
PE(P-16:1_20:1)+H	728.6	367.3	7.46	80	50
PE(P-16:1_20:2)+H	726.6	365.3	6.93	80	50
PE(P-16:1_20:3)+H	724.6	363.3	6.65	80	50
PE(P-16:1_20:4)+H	722.6	361.3	6.54	80	50
PE(P-16:1_20:5)+H	720.6	359.3	6.35	80	50
PE(P-16:1_22:4)+H	750.6	389.3	6.91	80	50
PE(P-16:1_22:5)+H	748.6	387.3	6.71	80	50
PE(P-16:1_22:6)+H	746.6	385.3	6.42	80	50
PE(P-18:0_14:0)+H	676.5	285.3	7.28	80	50
PE(P-18:0_15:0)+H	690.5	299.3	7.55	80	50
PE(P-18:0_16:0)+H	704.5	313.3	7.75	80	50
PE(P-18:0_16:1)+H	702.5	311.3	7.37	80	50
PE(P-18:0_17:0)+H	718.5	327.3	7.9	80	50
PE(P-18:0_18:0)+H	732.5	341.3	8.17	80	50
PE(P-18:0_18:1)+H	730.5	339.3	7.81	80	50
PE(P-18:0_18:2)+H	728.5	337.3	7.49	80	50
PE(P-18:0_18:3)+H	726.5	335.3	7.22	80	50
PE(P-18:0_19:0)+H	746.5	355.3	8.35	80	50
PE(P-18:0_20:0)+H	760.5	369.3	8.53	80	50
PE(P-18:0_20:1)+H	758.5	367.3	8.19	80	50
PE(P-18:0_20:2)+H	756.5	365.3	7.93	80	50
PE(P-18:0_20:3)+H	754.5	363.3	7.62	80	50
PE(P-18:0_20:4)+H	752.5	361.3	7.44	80	50
PE(P-18:0_20:5)+H	750.5	359.3	7.12	80	50
PE(P-18:0_22:4)+H	780.5	389.3	7.75	80	50
PE(P-18:0_22:5)+H	778.5	387.3	7.31	80	50
PE(P-18:0_22:6)+H	774.5	385.3	6.86	80	50
PE(P-18:1_14:0)+H	674.5	285.3	6.82	80	50
PE(P-18:1_15:0)+H	688.5	299.3	7.08	80	50
PE(P-18:1_16:0)+H	702.5	313.3	7.33	80	50
PE(P-18:1_16:1)+H	700.5	311.3	6.92	80	50
PE(P-18:1_17:0)+H	716.5	327.3	7.58	80	50
PE(P-18:1_18:0)+H	730.5	341.3	7.79	80	50
PE(P-18:1_18:1)+H	728.5	339.3	7.39	80	50
PE(P-18:1_18:2)+H	726.5	337.3	7.05	80	50
PE(P-18:1_18:3)+H	724.5	335.3	6.7	80	50
PE(P-18:1_19:0)+H	744.5	355.3	8.02	80	50
PE(P-18:1_20:0)+H	758.5	369.3	8.2	80	50
PE(P-18:1_20:1)+H	756.5	367.3	7.82	80	50
PE(P-18:1_20:2)+H	754.5	365.3	7.51	80	50
PE(P-18:1_20:3)+H	752.5	363.3	7.2	80	50
PE(P-18:1_20:4)+H	750.5	361.3	6.98	80	50
PE(P-18:1_20:5)+H	748.5	359.3	6.63	80	50
PE(P-18:1_22:4)+H	778.5	389.3	7.34	80	50
PE(P-18:1_22:5)+H	776.5	387.3	7.02	80	50
PE(P-18:1_22:6)+H	774.5	385.3	6.86	80	50
PE(P-20:0_14:0)+H	704.5	285.3	7.75	80	50
PE(P-20:0_15:0)+H	718.5	299.3	7.95	80	50
PE(P-20:0_16:0)+H	732.5	313.3	8.17	80	50
PE(P-20:0_16:1)+H	730.5	311.3	7.9	80	50
PE(P-20:0_17:0)+H	746.5	327.3	8.35	80	50
PE(P-20:0_18:0)+H	760.5	341.3	8.52	80	50
PE(P-20:0_18:1)+H	758.5	339.3	8.22	80	50
PE(P-20:0_18:2)+H	756.5	337.3	7.95	80	50
PE(P-20:0_18:3)+H	754.5	335.3	7.69	80	50
PE(P-20:0_19:0)+H	774.5	355.3	8.85	80	50
PE(P-20:0_20:0)+H	788.5	369.3	8.87	80	50
PE(P-20:0_20:1)+H	786.5	367.3	8.56	80	50
PE(P-20:0_20:2)+H	784.5	365.3	8.31	80	50
PE(P-20:0_20:3)+H	782.5	363.3	8.07	80	50
PE(P-20:0_20:4)+H	780.5	361.3	7.91	80	50
PE(P-20:0_20:5)+H	778.5	359.3	7.62	80	50
PE(P-20:0_22:4)+H	808.5	389.3	8.17	80	50
PE(P-20:0_22:5)+H	806.5	387.3	7.9	80	50
PE(P-20:0_22:6)+H	804.5	385.3	7.8	80	50
PE(P-20:1_14:0)+H	702.5	285.3	7.05	80	50
PE(P-20:1_15:0)+H	716.5	299.3	7.35	80	50
PE(P-20:1_16:0)+H	730.5	313.3	7.78	80	50
PE(P-20:1_16:1)+H	728.5	311.3	7.41	80	50
PE(P-20:1_17:0)+H	744.5	327.3	8.25	80	50
PE(P-20:1_18:0)+H	758.5	341.3	8.53	80	50
PE(P-20:1_18:1)+H	756.5	339.3	7.84	80	50
PE(P-20:1_18:2)+H	754.5	337.3	7.5	80	50
PE(P-20:1_18:3)+H	752.5	335.3	7.28	80	50
PE(P-20:1_19:0)+H	772.5	355.3	8.85	80	50
PE(P-20:1_20:0)+H	786.5	369.3	8.55	80	50
PE(P-20:1_20:1)+H	784.5	367.3	8.21	80	50
PE(P-20:1_20:2)+H	782.5	365.3	7.95	80	50
PE(P-20:1_20:3)+H	780.5	363.3	7.64	80	50
PE(P-20:1_20:4)+H	778.5	361.3	7.48	80	50
PE(P-20:1_20:5)+H	776.5	359.3	7.18	80	50
PE(P-20:1_22:4)+H	806.5	389.3	7.78	80	50
PE(P-20:1_22:5)+H	804.5	387.3	7.6	80	50
PE(P-20:1_22:6)+H	802.5	385.3	7.35	80	50
TAG(15:0_18:1-d7_15:0)+NH4_SPLASH.IS	829.37	570.5	9.95	80	38
TAG(40:0_FA14:0)+NH4	712.645	467.409	9.23	80	38
TAG(40:0_FA16:0)+NH4	712.645	439.378	9.23	80	38
TAG(42:0_FA14:0)+NH4	740.676	495.441	9.48	80	38
TAG(42:0_FA16:0)+NH4	740.676	467.409	9.48	80	38
TAG(42:1_FA14:0)+NH4	738.661	493.425	8.05	80	38
TAG(42:1_FA16:0)+NH4	738.661	465.394	8.04	80	38
TAG(42:1_FA16:1)+NH4	738.661	467.409	8.05	80	38
TAG(42:1_FA18:1)+NH4	738.661	439.378	8.05	80	38
TAG(42:2_FA18:2)+NH4	736.645	439.378	7.73	80	38
TAG(44:0_FA14:0)+NH4	768.708	523.472	9.74	80	38
TAG(44:0_FA16:0)+NH4	768.708	495.441	9.73	80	38
TAG(44:0_FA18:0)+NH4	768.708	467.409	9.75	80	38
TAG(44:1_FA14:0)+NH4	766.692	521.456	9.54	80	38
TAG(44:1_FA16:0)+NH4	766.692	493.425	9.53	80	38
TAG(44:1_FA16:1)+NH4	766.692	495.441	9.55	80	38
TAG(44:1_FA18:1)+NH4	766.692	467.409	9.52	80	38
TAG(44:2_FA14:0)+NH4	764.676	519.441	9.32	80	38
TAG(44:2_FA16:0)+NH4	764.676	491.409	9.33	80	38
TAG(44:2_FA16:1)+NH4	764.676	493.425	8.1	80	38
TAG(44:2_FA18:1)+NH4	764.676	465.394	9.33	80	38
TAG(44:2_FA18:2)+NH4	764.676	467.409	8.13	80	38
TAG(44:3_FA18:2)+NH4	762.661	465.394	9.18	80	38
TAG(45:0_FA14:0)+NH4	782.723	537.488	9.83	80	38
TAG(45:0_FA16:0)+NH4	782.723	509.456	9.82	80	38
TAG(45:1_FA16:0)+NH4	780.708	507.4	9.66	80	38
TAG(45:1_FA18:1)+NH4	780.708	481.4	9.66	80	38
TAG(46:0_FA14:0)+NH4	796.7	551.503	9.95	80	38
TAG(46:0_FA16:0)+NH4	796.7	523.472	9.95	80	38
TAG(46:0_FA18:0)+NH4	796.7	495.441	9.95	80	38
TAG(46:1_FA14:0)+NH4	794.7	549.5	9.75	80	38
TAG(46:1_FA16:0)+NH4	794.7	521.4	9.75	80	38
TAG(46:1_FA16:1)+NH4	794.7	523.472	9.76	80	38
TAG(46:1_FA18:0)+NH4	794.7	493.425	9.75	80	38
TAG(46:1_FA18:1)+NH4	794.7	495.441	9.75	80	38
TAG(46:2_FA14:0)+NH4	792.7	547.5	9.56	80	38
TAG(46:2_FA16:0)+NH4	792.7	519.441	9.57	80	38
TAG(46:2_FA16:1)+NH4	792.7	521.4	9.58	80	38
TAG(46:2_FA18:1)+NH4	792.7	493.425	9.55	80	38
TAG(46:2_FA18:2)+NH4	792.7	495.441	9.56	80	38
TAG(46:3_FA14:0)+NH4	790.7	545.5	9.37	80	38
TAG(46:3_FA16:0)+NH4	790.7	517.4	9.39	80	38
TAG(46:3_FA16:1)+NH4	790.7	519.441	9.34	80	38
TAG(46:3_FA18:1)+NH4	790.7	491.409	9.39	80	38
TAG(46:3_FA18:2)+NH4	790.7	493.425	9.36	80	38
TAG(46:3_FA18:3)+NH4	790.7	495.441	9.39	80	38
TAG(46:4_FA18:2)+NH4	788.7	491.409	9.16	80	38
TAG(47:0_FA14:0)+NH4	810.7	565.5	10.02	80	38
TAG(47:0_FA16:0)+NH4	810.7	537.4	10.04	80	38
TAG(47:0_FA17:0)+NH4	810.7	523.472	10.03	80	38
TAG(47:1_FA14:0)+NH4	808.7	563.5	9.85	80	38
TAG(47:1_FA16:0)+NH4	808.7	535.4	9.86	80	38
TAG(47:1_FA16:1)+NH4	808.7	537.4	9.87	80	38
TAG(47:1_FA17:0)+NH4	808.7	521.4	9.85	80	38
TAG(47:1_FA18:1)+NH4	808.7	509.4	9.84	80	38
TAG(47:2_FA14:0)+NH4	806.7	561.5	9.68	80	38
TAG(47:2_FA16:1)+NH4	806.7	535.4	9.72	80	38
TAG(47:2_FA18:1)+NH4	806.7	507.4	9.68	80	38
TAG(47:2_FA18:2)+NH4	806.7	509.4	9.67	80	38
TAG(48:0_FA14:0)+NH4	824.7	579.5	10.15	80	38
TAG(48:0_FA16:0)+NH4	824.7	551.4	10.14	80	38
TAG(48:0_FA18:0)+NH4	824.7	523.472	10.14	80	38
TAG(48:1_FA14:0)+NH4	822.7	577.5	9.95	80	38
TAG(48:1_FA16:0)+NH4	822.7	549.4	9.96	80	38
TAG(48:1_FA16:1)+NH4	822.7	551.4	9.96	80	38
TAG(48:1_FA18:0)+NH4	822.7	521.4	10	80	38
TAG(48:1_FA18:1)+NH4	822.7	523.472	9.96	80	38
TAG(48:2_FA14:0)+NH4	820.7	575.5	9.79	80	38
TAG(48:2_FA16:0)+NH4	820.7	547.4	9.78	80	38
TAG(48:2_FA16:1)+NH4	820.7	549.4	9.77	80	38
TAG(48:2_FA18:0)+NH4	820.7	519.441	9.8	80	38
TAG(48:2_FA18:1)+NH4	820.7	521.4	9.76	80	38
TAG(48:2_FA18:2)+NH4	820.7	523.472	9.79	80	38
TAG(48:3_FA14:0)+NH4	818.7	573.5	9.58	80	38
TAG(48:3_FA16:0)+NH4	818.7	545.4	9.58	80	38
TAG(48:3_FA16:1)+NH4	818.7	547.4	9.58	80	38
TAG(48:3_FA18:1)+NH4	818.7	519.441	9.58	80	38
TAG(48:3_FA18:2)+NH4	818.7	521.4	9.59	80	38
TAG(48:3_FA18:3)+NH4	818.7	523.472	9.66	80	38
TAG(48:4_FA14:0)+NH4	816.7	571.5	9.42	80	38
TAG(48:4_FA16:0)+NH4	816.7	543.4	9.47	80	38
TAG(48:4_FA16:1)+NH4	816.7	545.4	9.42	80	38
TAG(48:4_FA18:1)+NH4	816.7	517.4	9.42	80	38
TAG(48:4_FA18:2)+NH4	816.7	519.441	9.4	80	38
TAG(48:4_FA18:3)+NH4	816.7	521.4	9.42	80	38
TAG(48:4_FA20:4)+NH4	816.7	495.441	9.51	80	38
TAG(48:5_FA18:2)+NH4	814.7	517.4	9.22	80	38
TAG(48:5_FA18:3)+NH4	814.7	519.441	9.21	80	38
TAG(49:0_FA16:0)+NH4	838.8	565.5	10.23	80	38
TAG(49:0_FA17:0)+NH4	838.8	551.503	10.22	80	38
TAG(49:0_FA18:0)+NH4	838.8	537.5	10.23	80	38
TAG(49:1_FA14:0)+NH4	836.8	591.6	10.05	80	38
TAG(49:1_FA16:0)+NH4	836.8	563.5	10.06	80	38
TAG(49:1_FA16:1)+NH4	836.8	565.5	10.06	80	38
TAG(49:1_FA17:0)+NH4	836.8	549.5	10.05	80	38
TAG(49:1_FA18:1)+NH4	836.8	537.5	10.05	80	38
TAG(49:2_FA14:0)+NH4	834.8	589.6	10.05	80	38
TAG(49:2_FA16:0)+NH4	834.8	561.5	9.88	80	38
TAG(49:2_FA16:1)+NH4	834.8	563.5	9.9	80	38
TAG(49:2_FA17:0)+NH4	834.8	547.5	9.86	80	38
TAG(49:2_FA18:1)+NH4	834.8	535.5	9.85	80	38
TAG(49:2_FA18:2)+NH4	834.8	537.5	9.89	80	38
TAG(49:3_FA16:0)+NH4	832.8	559.5	9.74	80	38
TAG(49:3_FA16:1)+NH4	832.8	561.5	9.71	80	38
TAG(49:3_FA18:2)+NH4	832.8	535.5	9.69	80	38
TAG(49:3_FA18:3)+NH4	832.8	537.5	9.74	80	38
TAG(50:0_FA14:0)+NH4	852.8	607.6	10.35	80	38
TAG(50:0_FA16:0)+NH4	852.8	579.5	10.32	80	38
TAG(50:0_FA18:0)+NH4	852.8	551.503	10.32	80	38
TAG(50:1_FA14:0)+NH4	850.8	605.6	10.15	80	38
TAG(50:1_FA16:0)+NH4	850.8	577.5	10.14	80	38
TAG(50:1_FA16:1)+NH4	850.8	579.5	10.15	80	38
TAG(50:1_FA18:0)+NH4	850.8	549.5	10.15	80	38
TAG(50:1_FA18:1)+NH4	850.8	551.503	10.14	80	38
TAG(50:1_FA20:1)+NH4	850.8	523.472	10.13	80	38
TAG(50:2_FA14:0)+NH4	848.8	603.6	9.97	80	38
TAG(50:2_FA16:0)+NH4	848.8	575.5	9.98	80	38
TAG(50:2_FA16:1)+NH4	848.8	577.5	9.97	80	38
TAG(50:2_FA18:0)+NH4	848.8	547.5	9.99	80	38
TAG(50:2_FA18:1)+NH4	848.8	549.5	9.97	80	38
TAG(50:2_FA18:2)+NH4	848.8	551.503	9.99	80	38
TAG(50:2_FA20:2)+NH4	848.8	523.472	9.99	80	38
TAG(50:3_FA14:0)+NH4	846.8	601.6	9.8	80	38
TAG(50:3_FA16:0)+NH4	846.8	573.5	9.8	80	38
TAG(50:3_FA16:1)+NH4	846.8	575.5	9.79	80	38
TAG(50:3_FA18:0)+NH4	846.8	545.5	9.87	80	38
TAG(50:3_FA18:1)+NH4	846.8	547.5	9.8	80	38
TAG(50:3_FA18:2)+NH4	846.8	549.5	9.79	80	38
TAG(50:3_FA18:3)+NH4	846.8	551.503	9.86	80	38
TAG(50:3_FA20:3)+NH4	846.8	523.472	9.86	80	38
TAG(50:4_FA14:0)+NH4	844.6	599.4	9.62	80	38
TAG(50:4_FA16:0)+NH4	844.6	571.3	9.73	80	38
TAG(50:4_FA16:1)+NH4	844.6	573.3	9.6	80	38
TAG(50:4_FA18:1)+NH4	844.6	545.3	9.64	80	38
TAG(50:4_FA18:2)+NH4	844.6	547.3	9.61	80	38
TAG(50:4_FA18:3)+NH4	844.6	549.3	9.64	80	38
TAG(50:4_FA20:3)+NH4	844.6	521.3	9.68	80	38
TAG(50:4_FA20:4)+NH4	844.6	523.3	9.73	80	38
TAG(50:5_FA14:0)+NH4	842.6	597.4	9.52	80	38
TAG(50:5_FA16:0)+NH4	842.6	569.3	9.52	80	38
TAG(50:5_FA16:1)+NH4	842.6	571.3	9.49	80	38
TAG(50:5_FA18:1)+NH4	842.6	543.3	9.49	80	38
TAG(50:5_FA18:2)+NH4	842.6	545.3	9.46	80	38
TAG(50:5_FA18:3)+NH4	842.6	547.3	9.46	80	38
TAG(50:5_FA20:4)+NH4	842.6	521.3	9.55	80	38
TAG(50:5_FA20:5)+NH4	842.6	523.3	9.57	80	38
TAG(50:6_FA20:4)+NH4	840.7	519.441	9.34	80	38
TAG(51:0_FA16:0)+NH4	866.8	593.5	10.42	80	38
TAG(51:0_FA17:0)+NH4	866.8	579.5	10.41	80	38
TAG(51:0_FA18:0)+NH4	866.8	565.5	10.41	80	38
TAG(51:1_FA16:0)+NH4	864.8	591.5	10.23	80	38
TAG(51:1_FA17:0)+NH4	864.8	577.5	10.23	80	38
TAG(51:1_FA18:0)+NH4	864.8	563.5	10.23	80	38
TAG(51:1_FA18:1)+NH4	864.8	565.5	10.23	80	38
TAG(51:2_FA16:0)+NH4	862.8	589.5	10.08	80	38
TAG(51:2_FA16:1)+NH4	862.8	591.5	10.11	80	38
TAG(51:2_FA17:0)+NH4	862.8	575.5	10.07	80	38
TAG(51:2_FA18:1)+NH4	862.8	563.5	10.06	80	38
TAG(51:2_FA18:2)+NH4	862.8	565.5	10.08	80	38
TAG(51:3_FA16:1)+NH4	860.8	589.5	9.9	80	38
TAG(51:3_FA17:0)+NH4	860.8	573.5	9.91	80	38
TAG(51:3_FA18:2)+NH4	860.8	563.5	9.89	80	38
TAG(51:3_FA18:3)+NH4	860.8	565.5	9.92	80	38
TAG(51:4_FA16:1)+NH4	858.8	587.5	9.73	80	38
TAG(51:4_FA18:2)+NH4	858.8	561.5	9.74	80	38
TAG(51:4_FA18:3)+NH4	858.8	563.5	9.75	80	38
TAG(51:4_FA20:4)+NH4	858.8	537.5	9.75	80	38
TAG(51:5_FA18:2)+NH4	856.8	559.5	9.58	80	38
TAG(51:5_FA18:3)+NH4	856.8	561.5	9.59	80	38
TAG(52:0_FA16:0)+NH4	880.8	607.5	10.51	80	38
TAG(52:0_FA18:0)+NH4	880.8	579.5	10.52	80	38
TAG(52:0_FA20:0)+NH4	880.8	551.503	10.52	80	38
TAG(52:1_FA16:0)+NH4	878.8	605.5	10.34	80	38
TAG(52:1_FA16:1)+NH4	878.8	607.5	10.38	80	38
TAG(52:1_FA18:0)+NH4	878.8	577.5	10.34	80	38
TAG(52:1_FA18:1)+NH4	878.8	579.5	10.35	80	38
TAG(52:1_FA20:0)+NH4	878.8	549.5	10.34	80	38
TAG(52:1_FA20:1)+NH4	878.8	551.503	10.34	80	38
TAG(52:2_FA14:0)+NH4	876.8	631.6	10.2	80	38
TAG(52:2_FA16:0)+NH4	876.8	603.5	10.17	80	38
TAG(52:2_FA16:1)+NH4	876.8	605.5	10.18	80	38
TAG(52:2_FA18:0)+NH4	876.8	575.5	10.19	80	38
TAG(52:2_FA18:1)+NH4	876.8	577.5	10.17	80	38
TAG(52:2_FA18:2)+NH4	876.8	579.5	10.2	80	38
TAG(52:2_FA20:0)+NH4	876.8	547.5	10.17	80	38
TAG(52:2_FA20:1)+NH4	876.8	549.5	10.18	80	38
TAG(52:2_FA20:2)+NH4	876.8	551.503	10.18	80	38
TAG(52:3_FA14:0)+NH4	874.8	629.6	9.99	80	38
TAG(52:3_FA16:0)+NH4	874.8	601.5	10.02	80	38
TAG(52:3_FA16:1)+NH4	874.8	603.5	10	80	38
TAG(52:3_FA18:0)+NH4	874.8	573.5	10.01	80	38
TAG(52:3_FA18:1)+NH4	874.8	575.5	10.01	80	38
TAG(52:3_FA18:2)+NH4	874.8	577.5	10.01	80	38
TAG(52:3_FA18:3)+NH4	874.8	579.5	10.07	80	38
TAG(52:3_FA20:0)+NH4	874.8	545.5	10.01	80	38
TAG(52:3_FA20:1)+NH4	874.8	547.5	9.99	80	38
TAG(52:3_FA20:2)+NH4	874.8	549.5	10.01	80	38
TAG(52:3_FA20:3)+NH4	874.8	551.503	10.05	80	38
TAG(52:4_FA14:0)+NH4	872.8	627.6	9.91	80	38
TAG(52:4_FA16:0)+NH4	872.8	599.5	9.91	80	38
TAG(52:4_FA16:1)+NH4	872.8	601.5	9.83	80	38
TAG(52:4_FA18:0)+NH4	872.8	571.5	9.97	80	38
TAG(52:4_FA18:1)+NH4	872.8	573.5	9.83	80	38
TAG(52:4_FA18:2)+NH4	872.8	575.5	9.85	80	38
TAG(52:4_FA18:3)+NH4	872.8	577.5	9.87	80	38
TAG(52:4_FA20:0)+NH4	872.8	543.5	9.84	80	38
TAG(52:4_FA20:2)+NH4	872.8	547.5	9.83	80	38
TAG(52:4_FA20:3)+NH4	872.8	549.5	9.88	80	38
TAG(52:4_FA20:4)+NH4	872.8	551.503	9.96	80	38
TAG(52:4_FA22:4)+NH4	872.8	523.472	9.9	80	38
TAG(52:5_FA14:0)+NH4	870.8	625.6	9.76	80	38
TAG(52:5_FA16:0)+NH4	870.8	597.5	9.72	80	38
TAG(52:5_FA16:1)+NH4	870.8	599.5	9.72	80	38
TAG(52:5_FA18:1)+NH4	870.8	571.5	9.7	80	38
TAG(52:5_FA18:2)+NH4	870.8	573.5	9.65	80	38
TAG(52:5_FA18:3)+NH4	870.8	575.5	9.69	80	38
TAG(52:5_FA20:3)+NH4	870.8	547.5	9.68	80	38
TAG(52:5_FA20:4)+NH4	870.8	549.5	9.76	80	38
TAG(52:5_FA20:5)+NH4	870.8	551.503	9.81	80	38
TAG(52:5_FA22:5)+NH4	870.8	523.472	9.73	80	38
TAG(52:6_FA14:0)+NH4	868.8	623.6	9.66	80	38
TAG(52:6_FA16:0)+NH4	868.8	595.5	9.66	80	38
TAG(52:6_FA16:1)+NH4	868.8	597.5	9.48	80	38
TAG(52:6_FA18:1)+NH4	868.8	569.5	9.51	80	38
TAG(52:6_FA18:2)+NH4	868.8	571.5	9.48	80	38
TAG(52:6_FA18:3)+NH4	868.8	573.5	9.54	80	38
TAG(52:6_FA20:4)+NH4	868.8	547.5	9.64	80	38
TAG(52:6_FA20:5)+NH4	868.8	549.5	9.59	80	38
TAG(52:6_FA22:6)+NH4	868.8	523.472	9.67	80	38
TAG(52:7_FA16:0)+NH4	866.7	593.4	9.39	80	38
TAG(52:7_FA18:1)+NH4	866.7	567.4	9.36	80	38
TAG(52:7_FA20:5)+NH4	866.7	547.4	9.42	80	38
TAG(52:7_FA22:6)+NH4	866.7	521.4	9.48	80	38
TAG(52:8_FA16:1)+NH4	864.8	593.5	9.2	80	38
TAG(52:8_FA18:2)+NH4	864.8	567.5	9.2	80	38
TAG(53:0_FA16:0)+NH4	894.8	621.5	10.59	80	38
TAG(53:1_FA16:0)+NH4	892.8	619.5	10.44	80	38
TAG(53:1_FA17:0)+NH4	892.8	605.5	10.42	80	38
TAG(53:1_FA18:0)+NH4	892.8	591.5	10.42	80	38
TAG(53:1_FA18:1)+NH4	892.8	593.5	10.42	80	38
TAG(53:2_FA16:0)+NH4	890.8	617.5	10.26	80	38
TAG(53:2_FA17:0)+NH4	890.8	603.5	10.26	80	38
TAG(53:2_FA18:1)+NH4	890.8	591.5	10.25	80	38
TAG(53:2_FA18:2)+NH4	890.8	593.5	10.31	80	38
TAG(53:3_FA16:0)+NH4	888.8	615.5	10.11	80	38
TAG(53:3_FA17:0)+NH4	888.8	601.5	10.1	80	38
TAG(53:3_FA18:2)+NH4	888.8	591.5	10.1	80	38
TAG(53:4_FA16:0)+NH4	886.8	613.5	9.94	80	38
TAG(53:4_FA17:0)+NH4	886.8	599.5	9.94	80	38
TAG(53:4_FA18:2)+NH4	886.8	589.5	9.93	80	38
TAG(53:4_FA18:3)+NH4	886.8	591.5	9.95	80	38
TAG(53:4_FA20:4)+NH4	886.8	565.5	10.03	80	38
TAG(53:5_FA20:4)+NH4	884.8	563.5	9.86	80	38
TAG(53:6_FA20:4)+NH4	882.8	561.5	9.66	80	38
TAG(54:0_FA16:0)+NH4	908.8	635.5	10.68	80	38
TAG(54:0_FA18:0)+NH4	908.8	607.5	10.68	80	38
TAG(54:1_FA16:0)+NH4	906.8	633.5	10.5	80	38
TAG(54:1_FA18:0)+NH4	906.8	605.5	10.51	80	38
TAG(54:1_FA18:1)+NH4	906.8	607.5	10.52	80	38
TAG(54:1_FA20:0)+NH4	906.8	577.5	10.52	80	38
TAG(54:1_FA20:1)+NH4	906.8	579.5	10.51	80	38
TAG(54:2_FA16:0)+NH4	904.8	631.5	10.34	80	38
TAG(54:2_FA18:0)+NH4	904.8	603.5	10.35	80	38
TAG(54:2_FA18:1)+NH4	904.8	605.5	10.34	80	38
TAG(54:2_FA18:2)+NH4	904.8	607.5	10.39	80	38
TAG(54:2_FA20:0)+NH4	904.8	575.5	10.37	80	38
TAG(54:2_FA20:1)+NH4	904.8	577.5	10.34	80	38
TAG(54:2_FA20:2)+NH4	904.8	579.5	10.36	80	38
TAG(54:3_FA16:0)+NH4	902.8	629.5	10.19	80	38
TAG(54:3_FA16:1)+NH4	902.8	631.5	10.17	80	38
TAG(54:3_FA18:0)+NH4	902.8	601.5	10.21	80	38
TAG(54:3_FA18:1)+NH4	902.8	603.5	10.18	80	38
TAG(54:3_FA18:2)+NH4	902.8	605.5	10.2	80	38
TAG(54:3_FA18:3)+NH4	902.8	607.5	10.06	80	38
TAG(54:3_FA20:1)+NH4	902.8	575.5	10.19	80	38
TAG(54:3_FA20:2)+NH4	902.8	577.5	10.18	80	38
TAG(54:3_FA20:3)+NH4	902.8	579.5	10.23	80	38
TAG(54:4_FA16:0)+NH4	900.8	627.5	10.1	80	38
TAG(54:4_FA16:1)+NH4	900.8	629.5	10.04	80	38
TAG(54:4_FA18:0)+NH4	900.8	599.5	10.15	80	38
TAG(54:4_FA18:1)+NH4	900.8	601.5	10.02	80	38
TAG(54:4_FA18:2)+NH4	900.8	603.5	10.03	80	38
TAG(54:4_FA18:3)+NH4	900.8	605.5	10.07	80	38
TAG(54:4_FA20:1)+NH4	900.8	573.5	10.02	80	38
TAG(54:4_FA20:2)+NH4	900.8	575.5	10.04	80	38
TAG(54:4_FA20:3)+NH4	900.8	577.5	10.05	80	38
TAG(54:4_FA20:4)+NH4	900.8	579.5	10.15	80	38
TAG(54:4_FA22:4)+NH4	900.8	551.503	10.09	80	38
TAG(54:5_FA16:0)+NH4	898.8	625.5	9.96	80	38
TAG(54:5_FA16:1)+NH4	898.8	627.5	9.93	80	38
TAG(54:5_FA18:0)+NH4	898.8	597.5	9.97	80	38
TAG(54:5_FA18:1)+NH4	898.8	599.5	9.89	80	38
TAG(54:5_FA18:2)+NH4	898.8	601.5	9.86	80	38
TAG(54:5_FA18:3)+NH4	898.8	603.5	9.87	80	38
TAG(54:5_FA20:2)+NH4	898.8	573.5	9.75	80	38
TAG(54:5_FA20:3)+NH4	898.8	575.5	9.92	80	38
TAG(54:5_FA20:4)+NH4	898.8	577.5	9.96	80	38
TAG(54:5_FA20:5)+NH4	898.8	579.5	9.89	80	38
TAG(54:5_FA22:4)+NH4	898.8	549.5	9.91	80	38
TAG(54:5_FA22:5)+NH4	898.8	551.503	9.93	80	38
TAG(54:6_FA16:0)+NH4	896.8	623.5	9.87	80	38
TAG(54:6_FA16:1)+NH4	896.8	625.5	9.75	80	38
TAG(54:6_FA18:1)+NH4	896.8	597.5	9.73	80	38
TAG(54:6_FA18:2)+NH4	896.8	599.5	9.69	80	38
TAG(54:6_FA18:3)+NH4	896.8	601.5	9.71	80	38
TAG(54:6_FA20:3)+NH4	896.8	573.5	9.64	80	38
TAG(54:6_FA20:4)+NH4	896.8	575.5	9.79	80	38
TAG(54:6_FA20:5)+NH4	896.8	577.5	9.81	80	38
TAG(54:6_FA22:5)+NH4	896.8	549.5	9.87	80	38
TAG(54:6_FA22:6)+NH4	896.8	551.503	9.87	80	38
TAG(54:7_FA16:1)+NH4	894.8	623.5	9.68	80	38
TAG(54:7_FA18:1)+NH4	894.8	595.5	9.63	80	38
TAG(54:7_FA18:2)+NH4	894.8	597.5	9.53	80	38
TAG(54:7_FA18:3)+NH4	894.8	599.5	9.53	80	38
TAG(54:7_FA20:4)+NH4	894.8	573.5	9.61	80	38
TAG(54:7_FA20:5)+NH4	894.8	575.5	9.62	80	38
TAG(54:7_FA22:5)+NH4	894.8	547.5	9.64	80	38
TAG(54:7_FA22:6)+NH4	894.8	549.5	9.69	80	38
TAG(54:8_FA18:2)+NH4	892.8	595.5	9.51	80	38
TAG(54:8_FA18:3)+NH4	892.8	597.5	9.51	80	38
TAG(54:8_FA20:4)+NH4	892.8	571.5	9.53	80	38
TAG(54:8_FA20:5)+NH4	892.8	573.5	9.51	80	38
TAG(54:8_FA22:6)+NH4	892.8	547.5	9.51	80	38
TAG(55:1_FA16:0)+NH4	920.9	647.6	9.74	80	38
TAG(55:1_FA18:1)+NH4	920.9	621.6	9.69	80	38
TAG(55:2_FA18:1)+NH4	918.8	619.5	9.54	80	38
TAG(55:2_FA18:2)+NH4	918.8	621.5	9.5	80	38
TAG(55:3_FA18:1)+NH4	916.8	617.5	9.32	80	38
TAG(55:3_FA18:2)+NH4	916.8	619.5	9.28	80	38
TAG(55:4_FA18:1)+NH4	914.8	615.5	9.12	80	38
TAG(55:4_FA18:2)+NH4	914.8	617.5	9.09	80	38
TAG(55:5_FA18:1)+NH4	912.8	613.5	8.93	80	38
TAG(55:5_FA18:2)+NH4	912.8	615.5	8.93	80	38
TAG(55:5_FA20:4)+NH4	912.8	591.5	9	80	38
TAG(55:7_FA22:6)+NH4	908.8	563.5	9.79	80	38
TAG(56:10_FA18:2)+NH4	916.7	619.4	9.3	80	38
TAG(56:1_FA16:0)+NH4	934.9	661.6	10.68	80	38
TAG(56:1_FA18:1)+NH4	934.9	635.6	10.68	80	38
TAG(56:2_FA16:0)+NH4	932.9	659.6	10.49	80	38
TAG(56:2_FA18:0)+NH4	932.9	631.6	10.51	80	38
TAG(56:2_FA20:0)+NH4	932.9	603.6	10.52	80	38
TAG(56:2_FA20:1)+NH4	932.9	605.6	10.51	80	38
TAG(56:3_FA16:0)+NH4	930.8	657.5	10.38	80	38
TAG(56:3_FA18:0)+NH4	930.8	629.5	10.38	80	38
TAG(56:3_FA18:1)+NH4	930.8	631.5	10.35	80	38
TAG(56:3_FA18:2)+NH4	930.8	633.5	10.38	80	38
TAG(56:3_FA20:0)+NH4	930.8	601.5	10.39	80	38
TAG(56:3_FA20:1)+NH4	930.8	603.5	10.35	80	38
TAG(56:3_FA20:2)+NH4	930.8	605.5	10.37	80	38
TAG(56:4_FA16:0)+NH4	928.8	655.5	10.27	80	38
TAG(56:4_FA18:0)+NH4	928.8	627.5	10.32	80	38
TAG(56:4_FA18:1)+NH4	928.8	629.5	10.2	80	38
TAG(56:4_FA18:2)+NH4	928.8	631.5	10.19	80	38
TAG(56:4_FA20:1)+NH4	928.8	601.5	10.2	80	38
TAG(56:4_FA20:2)+NH4	928.8	603.5	10.2	80	38
TAG(56:4_FA20:3)+NH4	928.8	605.5	10.23	80	38
TAG(56:4_FA20:4)+NH4	928.8	607.5	10.33	80	38
TAG(56:4_FA22:4)+NH4	928.8	579.5	10.27	80	38
TAG(56:5_FA16:0)+NH4	926.8	653.5	10.09	80	38
TAG(56:5_FA18:0)+NH4	926.8	625.5	10.14	80	38
TAG(56:5_FA18:1)+NH4	926.8	627.5	10.12	80	38
TAG(56:5_FA18:2)+NH4	926.8	629.5	10.04	80	38
TAG(56:5_FA20:1)+NH4	926.8	599.5	10.11	80	38
TAG(56:5_FA20:2)+NH4	926.8	601.5	10.05	80	38
TAG(56:5_FA20:3)+NH4	926.8	603.5	10.07	80	38
TAG(56:5_FA20:4)+NH4	926.8	605.5	10.16	80	38
TAG(56:5_FA22:4)+NH4	926.8	577.5	10.11	80	38
TAG(56:5_FA22:5)+NH4	926.8	579.5	10.16	80	38
TAG(56:6_FA16:0)+NH4	924.8	651.5	10.08	80	38
TAG(56:6_FA18:0)+NH4	924.8	623.5	10.08	80	38
TAG(56:6_FA18:1)+NH4	924.8	625.5	9.96	80	38
TAG(56:6_FA18:2)+NH4	924.8	627.5	9.98	80	38
TAG(56:6_FA18:3)+NH4	924.8	629.5	9.93	80	38
TAG(56:6_FA20:2)+NH4	924.8	599.5	9.98	80	38
TAG(56:6_FA20:3)+NH4	924.8	601.5	9.96	80	38
TAG(56:6_FA20:4)+NH4	924.8	603.5	9.99	80	38
TAG(56:6_FA20:5)+NH4	924.8	605.5	10.01	80	38
TAG(56:6_FA22:4)+NH4	924.8	575.5	9.94	80	38
TAG(56:6_FA22:5)+NH4	924.8	577.5	9.96	80	38
TAG(56:6_FA22:6)+NH4	924.8	579.5	10.08	80	38
TAG(56:7_FA16:0)+NH4	922.8	649.5	9.89	80	38
TAG(56:7_FA16:1)+NH4	922.8	651.5	9.87	80	38
TAG(56:7_FA18:0)+NH4	922.8	621.5	9.9	80	38
TAG(56:7_FA18:1)+NH4	922.8	623.5	9.89	80	38
TAG(56:7_FA18:2)+NH4	922.8	625.5	9.78	80	38
TAG(56:7_FA18:3)+NH4	922.8	627.5	9.79	80	38
TAG(56:7_FA20:3)+NH4	922.8	599.5	9.79	80	38
TAG(56:7_FA20:4)+NH4	922.8	601.5	9.82	80	38
TAG(56:7_FA20:5)+NH4	922.8	603.5	9.82	80	38
TAG(56:7_FA22:4)+NH4	922.8	573.5	9.77	80	38
TAG(56:7_FA22:5)+NH4	922.8	575.5	9.85	80	38
TAG(56:7_FA22:6)+NH4	922.8	577.5	9.89	80	38
TAG(56:8_FA16:0)+NH4	920.8	647.5	9.74	80	38
TAG(56:8_FA16:1)+NH4	920.8	649.5	9.72	80	38
TAG(56:8_FA18:1)+NH4	920.8	621.5	9.72	80	38
TAG(56:8_FA18:2)+NH4	920.8	623.5	9.73	80	38
TAG(56:8_FA18:3)+NH4	920.8	625.5	9.75	80	38
TAG(56:8_FA20:4)+NH4	920.8	599.5	9.75	80	38
TAG(56:8_FA20:5)+NH4	920.8	601.5	9.76	80	38
TAG(56:8_FA22:5)+NH4	920.8	573.5	9.71	80	38
TAG(56:8_FA22:6)+NH4	920.8	575.5	9.72	80	38
TAG(56:9_FA18:3)+NH4	918.8	623.5	9.59	80	38
TAG(56:9_FA20:4)+NH4	918.8	597.5	9.57	80	38
TAG(56:9_FA20:5)+NH4	918.8	599.5	9.57	80	38
TAG(56:9_FA22:6)+NH4	918.8	573.5	9.57	80	38
TAG(57:10_FA22:6)+NH4	928.7	583.4	9.3	80	38
TAG(57:2_FA18:1)+NH4	946.9	647.6	9.77	80	38
TAG(57:3_FA18:2)+NH4	944.9	647.6	9.59	80	38
TAG(58:10_FA18:2)+NH4	944.8	647.5	9.57	80	38
TAG(58:10_FA20:4)+NH4	944.8	623.5	9.68	80	38
TAG(58:10_FA20:5)+NH4	944.8	625.5	9.65	80	38
TAG(58:10_FA22:5)+NH4	944.8	597.5	9.66	80	38
TAG(58:10_FA22:6)+NH4	944.8	599.5	9.68	80	38
TAG(58:2_FA18:1)+NH4	960.9	661.6	10.68	80	38
TAG(58:3_FA18:1)+NH4	958.9	659.6	10.52	80	38
TAG(58:5_FA18:1)+NH4	954.9	655.6	10.28	80	38
TAG(58:6_FA16:0)+NH4	952.8	679.5	10.14	80	38
TAG(58:6_FA18:0)+NH4	952.8	651.5	10.26	80	38
TAG(58:6_FA18:1)+NH4	952.8	653.5	10.11	80	38
TAG(58:6_FA20:4)+NH4	952.8	631.5	10.15	80	38
TAG(58:6_FA22:4)+NH4	952.8	603.5	10.12	80	38
TAG(58:6_FA22:5)+NH4	952.8	605.5	10.17	80	38
TAG(58:7_FA16:0)+NH4	950.8	677.5	10.07	80	38
TAG(58:7_FA18:0)+NH4	950.8	649.5	10.09	80	38
TAG(58:7_FA18:1)+NH4	950.8	651.5	10.08	80	38
TAG(58:7_FA18:2)+NH4	950.8	653.5	9.99	80	38
TAG(58:7_FA20:4)+NH4	950.8	629.5	9.99	80	38
TAG(58:7_FA22:4)+NH4	950.8	601.5	9.99	80	38
TAG(58:7_FA22:5)+NH4	950.8	603.5	9.96	80	38
TAG(58:7_FA22:6)+NH4	950.8	605.5	10.08	80	38
TAG(58:8_FA18:1)+NH4	948.8	649.5	9.9	80	38
TAG(58:8_FA18:2)+NH4	948.8	651.5	9.89	80	38
TAG(58:8_FA20:3)+NH4	948.8	625.5	9.87	80	38
TAG(58:8_FA20:4)+NH4	948.8	627.5	9.96	80	38
TAG(58:8_FA22:5)+NH4	948.8	601.5	9.89	80	38
TAG(58:8_FA22:6)+NH4	948.8	603.5	9.91	80	38
TAG(58:9_FA18:1)+NH4	946.8	647.5	9.76	80	38
TAG(58:9_FA18:2)+NH4	946.8	649.5	9.74	80	38
TAG(58:9_FA20:4)+NH4	946.8	625.5	9.77	80	38
TAG(58:9_FA22:5)+NH4	946.8	599.5	9.67	80	38
TAG(58:9_FA22:6)+NH4	946.8	601.5	9.75	80	38
TAG(60:10_FA22:5)+NH4	972.8	625.5	9.78	80	38
TAG(60:10_FA22:6)+NH4	972.8	627.5	9.88	80	38
TAG(60:11_FA22:5)+NH4	970.8	623.5	9.62	80	38
TAG(60:11_FA22:6)+NH4	970.8	625.5	9.66	80	38
TAG(60:12_FA22:6)+NH4	968.8	623.5	9.6	80	38
DAG(15:0_18:1-d7)+NH4_SPLASH.IS	605.5	346.3	7.59	80	26
DAG(14:0_14:0)+NH4	530.478	285.243	7.05	80	26
DAG(14:0_15:0)+NH4	544.494	285.243	7.31	80	26
DAG(14:0_16:0)+NH4	558.509	285.243	7.58	80	26
DAG(14:0_16:1)+NH4	556.494	285.243	7.17	80	26
DAG(14:0_17:0)+NH4	572.525	285.243	7.78	80	26
DAG(14:0_18:0)+NH4	586.54	285.242	8.03	80	26
DAG(14:0_18:1)+NH4	584.525	285.243	7.62	80	26
DAG(14:0_18:2)+NH4	582.509	285.242	7.33	80	26
DAG(14:0_18:3)+NH4	580.494	285.243	6.95	80	26
DAG(14:0_19:0)+NH4	600.556	285.243	8.2	80	26
DAG(14:0_20:0)+NH4	614.572	285.243	8.42	80	26
DAG(14:0_20:1)+NH4	612.556	285.242	8.08	80	26
DAG(14:0_20:2)+NH4	610.54	285.242	7.73	80	26
DAG(14:0_20:3)+NH4	608.525	285.243	7.55	80	26
DAG(14:0_20:4)+NH4	606.509	285.242	7.18	80	26
DAG(14:0_20:5)+NH4	604.494	285.243	6.95	80	26
DAG(14:0_22:4)+NH4	634.54	285.242	7.52	80	26
DAG(14:0_22:5)+NH4	632.525	285.243	7.39	80	26
DAG(14:0_22:6)+NH4	630.509	285.243	7.07	80	26
DAG(15:0_15:0)+NH4	558.509	299.258	7.56	80	26
DAG(15:0_16:0)+NH4	572.525	299.258	7.79	80	26
DAG(15:0_16:1)+NH4	570.509	299.258	7.41	80	26
DAG(15:0_17:0)+NH4	586.54	299.258	7.89	80	26
DAG(15:0_18:0)+NH4	600.556	299.258	8.24	80	26
DAG(15:0_18:1)+NH4	598.54	299.258	7.87	80	26
DAG(15:0_18:2)+NH4	596.525	299.258	7.6	80	26
DAG(15:0_18:3)+NH4	594.509	299.258	7.28	80	26
DAG(15:0_19:0)+NH4	614.572	299.258	8.35	80	26
DAG(15:0_20:0)+NH4	628.587	299.258	8.45	80	26
DAG(15:0_20:1)+NH4	626.572	299.258	8.23	80	26
DAG(15:0_20:2)+NH4	624.556	299.258	8.01	80	26
DAG(15:0_20:3)+NH4	622.54	299.258	7.78	80	26
DAG(15:0_20:4)+NH4	620.525	299.258	7.45	80	26
DAG(15:0_20:5)+NH4	618.509	299.258	7.15	80	26
DAG(15:0_22:4)+NH4	648.556	299.258	8.49	80	26
DAG(15:0_22:5)+NH4	646.54	299.259	8.23	80	26
DAG(15:0_22:6)+NH4	644.525	299.259	7.31	80	26
DAG(16:0_16:0)+NH4	586.54	313.273	8.02	80	26
DAG(16:0_16:1)+NH4	584.525	313.274	7.65	80	26
DAG(16:0_17:0)+NH4	600.556	313.274	8.2	80	26
DAG(16:0_18:0)+NH4	614.572	313.274	8.42	80	26
DAG(16:0_18:1)+NH4	612.556	313.274	8.08	80	26
DAG(16:0_18:2)+NH4	610.54	313.273	7.75	80	26
DAG(16:0_18:3)+NH4	608.5	313.273	7.46	80	26
DAG(16:0_19:0)+NH4	628.587	313.274	8.59	80	26
DAG(16:0_20:0)+NH4	642.603	313.274	8.77	80	26
DAG(16:0_20:1)+NH4	640.587	313.273	8.44	80	26
DAG(16:0_20:2)+NH4	638.572	313.274	8.16	80	26
DAG(16:0_20:3)+NH4	636.556	313.274	7.9	80	26
DAG(16:0_20:4)+NH4	634.54	313.273	7.7	80	26
DAG(16:0_20:5)+NH4	632.525	313.274	7.38	80	26
DAG(16:0_22:4)+NH4	662.572	313.274	8.02	80	26
DAG(16:0_22:5)+NH4	660.556	313.274	7.73	80	26
DAG(16:0_22:6)+NH4	658.54	313.274	7.57	80	26
DAG(16:1_16:1)+NH4	582.509	311.258	7.22	80	26
DAG(16:1_17:0)+NH4	598.54	311.258	7.88	80	26
DAG(16:1_18:0)+NH4	612.556	311.258	8.1	80	26
DAG(16:1_18:1)+NH4	610.54	311.258	7.71	80	26
DAG(16:1_18:2)+NH4	608.525	311.258	7.32	80	26
DAG(16:1_18:3)+NH4	606.509	311.258	6.99	80	26
DAG(16:1_19:0)+NH4	626.572	311.258	8.27	80	26
DAG(16:1_20:0)+NH4	640.587	311.258	8.49	80	26
DAG(16:1_20:1)+NH4	638.572	311.258	8.13	80	26
DAG(16:1_20:2)+NH4	636.556	311.258	7.78	80	26
DAG(16:1_20:3)+NH4	634.54	311.258	7.57	80	26
DAG(16:1_20:4)+NH4	632.525	311.258	7.26	80	26
DAG(16:1_20:5)+NH4	630.509	311.258	7.09	80	26
DAG(16:1_22:4)+NH4	660.556	311.258	7.65	80	26
DAG(16:1_22:5)+NH4	658.54	311.259	7.58	80	26
DAG(16:1_22:6)+NH4	656.525	311.259	7.17	80	26
DAG(17:0_17:0)+NH4	614.572	327.29	8.25	80	26
DAG(17:0_18:0)+NH4	628.587	327.29	8.55	80	26
DAG(17:0_18:1)+NH4	626.572	327.29	8.28	80	26
DAG(17:0_18:2)+NH4	624.556	327.29	7.97	80	26
DAG(17:0_18:3)+NH4	622.54	327.29	7.65	80	26
DAG(17:0_19:0)+NH4	642.603	327.29	8.65	80	26
DAG(17:0_20:0)+NH4	656.619	327.29	8.95	80	26
DAG(17:0_20:1)+NH4	654.603	327.29	8.62	80	26
DAG(17:0_20:2)+NH4	652.587	327.29	8.33	80	26
DAG(17:0_20:3)+NH4	650.572	327.29	8.11	80	26
DAG(17:0_20:4)+NH4	648.556	327.29	7.93	80	26
DAG(17:0_20:5)+NH4	646.54	327.29	7.61	80	26
DAG(17:0_22:4)+NH4	676.587	327.29	8.25	80	26
DAG(17:0_22:5)+NH4	674.572	327.29	7.89	80	26
DAG(17:0_22:6)+NH4	672.556	327.29	7.77	80	26
DAG(18:0_18:0)+NH4	642.603	341.305	8.77	80	26
DAG(18:0_18:1)+NH4	640.587	341.305	8.46	80	26
DAG(18:0_18:2)+NH4	638.572	341.306	8.18	80	26
DAG(18:0_18:3)+NH4	636.556	341.305	7.99	80	26
DAG(18:0_19:0)+NH4	656.619	341.305	8.63	80	26
DAG(18:0_20:0)+NH4	670.634	341.305	9.09	80	26
DAG(18:0_20:1)+NH4	668.619	341.306	8.78	80	26
DAG(18:0_20:2)+NH4	666.603	341.305	8.56	80	26
DAG(18:0_20:3)+NH4	664.587	341.305	8.32	80	26
DAG(18:0_20:4)+NH4	662.572	341.306	8.14	80	26
DAG(18:0_20:5)+NH4	660.556	341.305	7.9	80	26
DAG(18:0_22:4)+NH4	690.603	341.305	8.41	80	26
DAG(18:0_22:5)+NH4	688.587	341.305	8.13	80	26
DAG(18:0_22:6)+NH4	686.572	341.306	8.04	80	26
DAG(18:1_18:1)+NH4	638.572	339.29	8.12	80	26
DAG(18:1_18:2)+NH4	636.556	339.289	7.81	80	26
DAG(18:1_18:3)+NH4	634.54	339.289	7.54	80	26
DAG(18:1_19:0)+NH4	654.603	339.29	8.65	80	26
DAG(18:1_20:0)+NH4	668.619	339.29	8.8	80	26
DAG(18:1_20:1)+NH4	666.603	339.289	8.48	80	26
DAG(18:1_20:2)+NH4	664.587	339.289	8.2	80	26
DAG(18:1_20:3)+NH4	662.572	339.29	7.93	80	26
DAG(18:1_20:4)+NH4	660.556	339.289	7.75	80	26
DAG(18:1_20:5)+NH4	658.54	339.289	7.47	80	26
DAG(18:1_22:4)+NH4	688.587	339.289	8.07	80	26
DAG(18:1_22:5)+NH4	686.572	339.29	7.79	80	26
DAG(18:1_22:6)+NH4	684.556	339.29	7.65	80	26
DAG(18:2_18:2)+NH4	634.54	337.273	7.48	80	26
DAG(18:2_18:3)+NH4	632.525	337.274	7.18	80	26
DAG(18:2_19:0)+NH4	652.587	337.274	8.11	80	26
DAG(18:2_20:0)+NH4	666.603	337.274	8.58	80	26
DAG(18:2_20:1)+NH4	664.587	337.273	8.22	80	26
DAG(18:2_20:2)+NH4	662.572	337.274	7.93	80	26
DAG(18:2_20:3)+NH4	660.556	337.274	7.76	80	26
DAG(18:2_20:4)+NH4	658.54	337.273	7.41	80	26
DAG(18:2_20:5)+NH4	656.525	337.274	7.11	80	26
DAG(18:2_22:4)+NH4	686.572	337.274	7.76	80	26
DAG(18:2_22:5)+NH4	684.556	337.274	7.61	80	26
DAG(18:2_22:6)+NH4	682.54	337.274	7.28	80	26
DAG(18:3_18:3)+NH4	630.509	335.258	6.78	80	26
DAG(18:3_19:0)+NH4	650.572	335.258	7.72	80	26
DAG(18:3_20:0)+NH4	664.587	335.258	8.15	80	26
DAG(18:3_20:1)+NH4	662.572	335.258	7.91	80	26
DAG(18:3_20:2)+NH4	660.556	335.258	7.62	80	26
DAG(18:3_20:3)+NH4	658.54	335.258	7.38	80	26
DAG(18:3_20:4)+NH4	656.525	335.258	7.1	80	26
DAG(18:3_20:5)+NH4	654.509	335.258	6.84	80	26
DAG(18:3_22:4)+NH4	684.556	335.258	7.42	80	26
DAG(18:3_22:5)+NH4	682.54	335.259	7.29	80	26
DAG(18:3_22:6)+NH4	680.525	335.259	6.99	80	26
DAG(19:0_19:0)+NH4	670.634	355.321	8.95	80	26
DAG(19:0_20:0)+NH4	684.65	355.321	9.15	80	26
DAG(19:0_20:1)+NH4	682.634	355.321	8.95	80	26
DAG(19:0_20:2)+NH4	680.619	355.321	8.75	80	26
DAG(19:0_20:3)+NH4	678.603	355.321	8.57	80	26
DAG(19:0_20:4)+NH4	676.587	355.321	8.31	80	26
DAG(19:0_20:5)+NH4	674.572	355.321	8.05	80	26
DAG(19:0_22:4)+NH4	704.619	355.321	7.35	80	26
DAG(19:0_22:5)+NH4	702.603	355.321	7.15	80	26
DAG(19:0_22:6)+NH4	700.587	355.321	6.97	80	26
DAG(20:0_20:0)+NH4	698.666	369.337	11.05	80	26
DAG(20:0_20:1)+NH4	696.65	369.336	10.85	80	26
DAG(20:0_20:2)+NH4	694.634	369.336	10.65	80	26
DAG(20:0_20:3)+NH4	692.619	369.337	10.47	80	26
DAG(20:0_20:4)+NH4	690.603	369.336	10.31	80	26
DAG(20:0_20:5)+NH4	688.587	369.336	10.14	80	26
DAG(20:0_22:4)+NH4	716.619	367.321	10.55	80	26
DAG(20:0_22:5)+NH4	716.619	369.337	10.34	80	26
DAG(20:0_22:6)+NH4	714.603	369.337	10.21	80	26
DAG(20:1_20:1)+NH4	694.634	367.321	8.8	80	26
DAG(20:1_20:2)+NH4	692.619	367.321	8.57	80	26
DAG(20:1_20:3)+NH4	690.603	367.321	8.32	80	26
DAG(20:1_20:4)+NH4	688.587	367.321	8.17	80	26
DAG(20:1_20:5)+NH4	686.572	367.321	8.03	80	26
DAG(20:1_22:4)+NH4	716.619	367.321	8.42	80	26
DAG(20:1_22:5)+NH4	714.603	367.321	8.09	80	26
DAG(20:1_22:6)+NH4	712.587	367.321	8.06	80	26
DAG(20:2_20:2)+NH4	690.603	365.305	8.34	80	26
DAG(20:2_20:3)+NH4	688.587	365.305	8.16	80	26
DAG(20:2_20:4)+NH4	686.572	365.305	7.89	80	26
DAG(20:2_20:5)+NH4	684.556	365.305	7.54	80	26
DAG(20:2_22:4)+NH4	742.634	393.337	7.54	80	26
DAG(20:2_22:5)+NH4	740.619	393.337	6.63	80	26
DAG(20:2_22:6)+NH4	738.603	393.337	5.88	80	26
DAG(20:3_20:3)+NH4	686.572	363.29	7.87	80	26
DAG(20:3_20:4)+NH4	684.556	363.29	7.56	80	26
DAG(20:3_20:5)+NH4	682.54	363.29	7.32	80	26
DAG(20:3_22:4)+NH4	712.587	363.29	8.04	80	26
DAG(20:3_22:5)+NH4	710.572	363.29	7.72	80	26
DAG(20:3_22:6)+NH4	708.556	363.29	7.58	80	26
DAG(20:4_20:4)+NH4	682.54	361.274	7.33	80	26
DAG(20:4_20:5)+NH4	680.525	361.274	7	80	26
DAG(20:4_22:4)+NH4	710.572	361.274	6.65	80	26
DAG(20:4_22:5)+NH4	708.556	361.274	7.43	80	26
DAG(20:4_22:6)+NH4	706.54	361.274	7.21	80	26
DAG(20:5_20:5)+NH4	678.509	359.258	6.85	80	26
DAG(20:5_22:4)+NH4	708.556	359.258	6.29	80	26
DAG(20:5_22:5)+NH4	706.54	359.259	5.08	80	26
DAG(20:5_22:6)+NH4	704.525	359.259	6.99	80	26
DAG(22:4_22:4)+NH4	738.603	389.305	7.05	80	26
DAG(22:4_22:5)+NH4	736.587	389.306	6.85	80	26
DAG(22:4_22:6)+NH4	734.572	389.306	7.59	80	26
DAG(22:5_22:5)+NH4	734.572	387.29	7.58	80	26
DAG(22:5_22:6)+NH4	732.556	387.29	7.25	80	26
DAG(22:6_22:6)+NH4	730.54	385.274	7.1	80	26
MAG(18:1)+NH4_d7_SPLASH.IS	381.3	82.08	2.64	80	26
MAG 16:0	313.2	239.2	3.13	80	25
MAG 16:1	311.2	237.2	2.43	80	25
MAG 18:0	341.2	267.2	4.05	80	25
MAG 18:1	339.2	265.2	3.32	80	25
MAG 18:2	337.2	263.2	2.69	80	25
MAG 20:0	369.2	295.2	3.95	80	25
MAG 20:1	367.2	293.2	3.75	80	25
MAG 20:2	365.2	291.2	3.53	80	25
MAG 20:3	363.2	289.2	3.32	80	25
MAG 20:4	361.2	287.2	2.67	80	25
MAG 22:0	397.2	323.2	4.06	80	25
MAG 22:1	395.2	321.2	3.34	80	25
MAG 22:2	393.2	319.2	2.71	80	25
MAG 22:3	391.2	317.2	2.18	80	25
MAG 22:4	389.2	315.2	3.31	80	25
MAG 22:5	387.2	313.2	2.99	80	25
MAG 22:6	385.2	311.2	2.63	80	25

## Sheet: NE
ID	Q1	Q3	RT	DP	CE
LPC(18:1-d7)+AcO_SPLASH.IS	587.4	288.3	2.49	-80	-50
LPC(14:0)+AcO	526.3	227.2	1.63	-80	-50
LPC(15:0)+AcO	540.3	241.2	2.01	-80	-50
LPC(16:0)+AcO	554.3	255.2	2.39	-80	-50
LPC(16:1)+AcO	552.3	253.2	1.8	-80	-50
LPC(17:0)+AcO	568.4	269.2	2.82	-80	-50
LPC(18:0)+AcO	582.4	283.3	3.28	-80	-50
LPC(18:1)+AcO	580.4	281.2	2.57	-80	-50
LPC(18:2)+AcO	578.3	279.2	2.02	-80	-50
LPC(18:3)+AcO	576.3	277.2	1.68	-80	-50
LPC(19:0)+AcO	596.4	297.3	3.74	-80	-50
LPC(20:0)+AcO	610.4	311.3	4.2	-80	-50
LPC(20:1)+AcO	608.4	309.3	3.4	-80	-50
LPC(20:2)+AcO	606.4	307.3	2.78	-80	-50
LPC(20:3)+AcO	604.4	305.2	2.25	-80	-50
LPC(20:4)+AcO	602.3	303.2	1.88	-80	-50
LPC(20:5)+AcO	600.3	301.2	1.62	-80	-50
LPC(22:4)+AcO	630.4	331.3	2.45	-80	-50
LPC(22:5)+AcO	628.4	329.2	2.21	-80	-50
LPC(22:6)+AcO	626.3	327.2	1.81	-80	-50
PC(15:0_18:1-d7)+AcO_SPLASH.IS	811.6	288.3	6.84	-80	-50
PC(14:0_14:0)+AcO	736.5	227.2	5.82	-80	-50
PC(14:0_15:0)+AcO	750.5	241.2	6.25	-80	-50
PC(14:0_16:0)+AcO	764.5	227.2	6.46	-80	-50
PC(14:0_16:1)+AcO	762.5	253.2	6.09	-80	-50
PC(14:0_17:0)+AcO	778.6	269.2	7.09	-80	-50
PC(14:0_18:0)+AcO	792.6	227.2	7.15	-80	-50
PC(14:0_18:1)+AcO	790.6	281.2	6.73	-80	-50
PC(14:0_18:2)+AcO	788.5	279.2	6.49	-80	-50
PC(14:0_18:3)+AcO	786.5	277.2	5.83	-80	-50
PC(14:0_19:0)+AcO	806.6	297.3	7.45	-80	-50
PC(14:0_20:0)+AcO	820.6	227.2	8.4	-80	-50
PC(14:0_20:1)+AcO	818.6	309.3	7.15	-80	-50
PC(14:0_20:2)+AcO	816.6	307.3	6.99	-80	-50
PC(14:0_20:3)+AcO	814.6	305.2	6.58	-80	-50
PC(14:0_20:4)+AcO	812.5	303.2	6.37	-80	-50
PC(14:0_20:5)+AcO	810.5	301.2	5.81	-80	-50
PC(14:0_22:4)+AcO	840.6	331.3	6.69	-80	-50
PC(14:0_22:5)+AcO	838.6	329.2	6.48	-80	-50
PC(14:0_22:6)+AcO	836.5	327.2	6.29	-80	-50
PC(15:0_15:0)+AcO	764.5	241.2	6.86	-80	-50
PC(15:0_16:0)+AcO	778.6	241.2	6.86	-80	-50
PC(15:0_16:1)+AcO	776.5	241.2	6.36	-80	-50
PC(15:0_17:0)+AcO	792.6	241.2	7.15	-80	-50
PC(15:0_18:0)+AcO	806.6	241.2	7.3	-80	-50
PC(15:0_18:1)+AcO	804.6	241.2	6.95	-80	-50
PC(15:0_18:2)+AcO	802.6	241.2	6.54	-80	-50
PC(15:0_18:3)+AcO	800.5	241.2	6.17	-80	-50
PC(15:0_19:0)+AcO	820.6	241.2	7.45	-80	-50
PC(15:0_20:0)+AcO	834.6	241.2	7.65	-80	-50
PC(15:0_20:1)+AcO	832.6	241.2	7.45	-80	-50
PC(15:0_20:2)+AcO	830.6	241.2	7.04	-80	-50
PC(15:0_20:3)+AcO	828.6	241.2	6.71	-80	-50
PC(15:0_20:4)+AcO	826.6	241.2	6.5	-80	-50
PC(15:0_20:5)+AcO	824.5	241.2	6.11	-80	-50
PC(15:0_22:4)+AcO	854.6	241.2	6.89	-80	-50
PC(15:0_22:5)+AcO	852.6	241.2	6.56	-80	-50
PC(15:0_22:6)+AcO	850.6	241.2	6.34	-80	-50
PC(16:0_16:0)+AcO	792.6	255.2	7.13	-80	-50
PC(16:0_16:1)+AcO	790.6	253.2	6.7	-80	-50
PC(16:0_17:0)+AcO	806.5	269.2	7.41	-80	-50
PC(16:0_18:0)+AcO	820.6	283.3	7.66	-80	-50
PC(16:0_18:1)+AcO	818.6	281.2	7.22	-80	-50
PC(16:0_18:2)+AcO	816.6	279.2	6.84	-80	-50
PC(16:0_18:3)+AcO	814.6	277.2	6.56	-80	-50
PC(16:0_19:0)+AcO	834.6	297.3	7.9	-80	-50
PC(16:0_20:1)+AcO	846.6	309.3	7.69	-80	-50
PC(16:0_20:2)+AcO	844.6	307.3	7.31	-80	-50
PC(16:0_20:3)+AcO	842.6	305.2	7	-80	-50
PC(16:0_20:4)+AcO	840.6	303.2	6.78	-80	-50
PC(16:0_20:5)+AcO	838.6	301.2	6.42	-80	-50
PC(16:0_22:4)+AcO	868.6	331.3	7.17	-80	-50
PC(16:0_22:5)+AcO	866.6	329.2	6.84	-80	-50
PC(16:0_22:6)+AcO	864.6	327.2	6.67	-80	-50
PC(16:1_16:1)+AcO	788.6	253.2	6.19	-80	-50
PC(16:1_18:0)+AcO	818.6	253.2	7.27	-80	-50
PC(16:1_18:1)+AcO	816.6	281.2	6.77	-80	-50
PC(16:1_18:2)+AcO	814.6	253.2	6.34	-80	-50
PC(16:1_18:3)+AcO	812.5	253.2	5.96	-80	-50
PC(16:1_19:0)+AcO	832.6	297.3	7.5	-80	-50
PC(16:1_20:0)+AcO	846.6	253.2	7.79	-80	-50
PC(16:1_20:1)+AcO	844.6	253.2	7.29	-80	-50
PC(16:1_20:2)+AcO	842.6	253.2	6.91	-80	-50
PC(16:1_20:3)+AcO	840.6	253.2	6.43	-80	-50
PC(16:1_20:4)+AcO	838.6	253.2	6.31	-80	-50
PC(16:1_20:5)+AcO	836.5	253.2	5.92	-80	-50
PC(16:1_22:4)+AcO	866.6	253.2	6.55	-80	-50
PC(16:1_22:5)+AcO	864.6	253.2	6.18	-80	-50
PC(16:1_22:6)+AcO	862.6	253.2	6.06	-80	-50
PC(17:0_17:0)+AcO	820.6	269.2	6.17	-80	-50
PC(17:0_18:0)+AcO	834.6	269.2	7.88	-80	-50
PC(17:0_18:1)+AcO	832.6	269.2	7.49	-80	-50
PC(17:0_18:2)+AcO	830.6	269.2	7.11	-80	-50
PC(17:0_18:3)+AcO	828.6	269.2	6.75	-80	-50
PC(17:0_19:0)+AcO	848.6	269.2	7.95	-80	-50
PC(17:0_20:0)+AcO	862.7	269.2	8.15	-80	-50
PC(17:0_20:1)+AcO	860.6	269.2	7.93	-80	-50
PC(17:0_20:2)+AcO	858.6	269.2	7.59	-80	-50
PC(17:0_20:3)+AcO	856.6	269.2	7.12	-80	-50
PC(17:0_20:4)+AcO	854.6	269.2	6.94	-80	-50
PC(17:0_20:5)+AcO	852.6	269.2	6.57	-80	-50
PC(17:0_22:4)+AcO	882.6	269.2	7.35	-80	-50
PC(17:0_22:5)+AcO	880.6	269.2	6.94	-80	-50
PC(17:0_22:6)+AcO	878.6	269.2	6.82	-80	-50
PC(18:0_18:0)+AcO	848.6	283.3	8.02	-80	-50
PC(18:0_18:1)+AcO	846.6	281.2	7.62	-80	-50
PC(18:0_18:2)+AcO	844.6	279.2	7.26	-80	-50
PC(18:0_18:3)+AcO	842.6	277.2	6.98	-80	-50
PC(18:0_19:0)+AcO	862.7	297.3	7.84	-80	-50
PC(18:0_20:0)+AcO	876.7	283.3	8.46	-80	-50
PC(18:0_20:1)+AcO	874.7	309.3	8.04	-80	-50
PC(18:0_20:2)+AcO	872.6	307.3	7.7	-80	-50
PC(18:0_20:3)+AcO	870.6	305.2	7.42	-80	-50
PC(18:0_20:4)+AcO	868.6	303.2	7.33	-80	-50
PC(18:0_20:5)+AcO	866.6	301.2	7	-80	-50
PC(18:0_22:4)+AcO	896.6	331.3	7.55	-80	-50
PC(18:0_22:5)+AcO	894.6	329.2	7.24	-80	-50
PC(18:0_22:6)+AcO	892.6	327.2	7.09	-80	-50
PC(18:1_18:1)+AcO	844.6	281.2	7.29	-80	-50
PC(18:1_18:2)+AcO	842.6	279.2	6.91	-80	-50
PC(18:1_18:3)+AcO	840.6	277.2	6.64	-80	-50
PC(18:1_19:0)+AcO	860.6	297.3	7.85	-80	-50
PC(18:1_20:0)+AcO	874.7	281.2	8.09	-80	-50
PC(18:1_20:1)+AcO	872.6	309.3	7.64	-80	-50
PC(18:1_20:2)+AcO	870.6	307.3	7.28	-80	-50
PC(18:1_20:3)+AcO	868.6	305.2	6.97	-80	-50
PC(18:1_20:4)+AcO	866.6	303.2	6.75	-80	-50
PC(18:1_20:5)+AcO	864.6	301.2	6.38	-80	-50
PC(18:1_22:4)+AcO	894.6	331.3	7.12	-80	-50
PC(18:1_22:5)+AcO	892.6	329.2	6.78	-80	-50
PC(18:1_22:6)+AcO	890.6	327.2	6.74	-80	-50
PC(18:2_18:2)+AcO	840.6	279.2	6.5	-80	-50
PC(18:2_18:3)+AcO	838.6	277.2	6.12	-80	-50
PC(18:2_19:0)+AcO	858.6	297.3	7.51	-80	-50
PC(18:2_20:0)+AcO	872.6	311.3	7.89	-80	-50
PC(18:2_20:1)+AcO	870.6	309.3	7.4	-80	-50
PC(18:2_20:2)+AcO	868.6	307.3	7.03	-80	-50
PC(18:2_20:3)+AcO	866.6	305.2	6.67	-80	-50
PC(18:2_20:4)+AcO	864.6	303.2	6.46	-80	-50
PC(18:2_20:5)+AcO	862.6	301.2	6.08	-80	-50
PC(18:2_22:4)+AcO	892.6	331.3	7.57	-80	-50
PC(18:2_22:5)+AcO	890.6	329.2	6.38	-80	-50
PC(18:2_22:6)+AcO	888.6	327.2	6.33	-80	-50
PC(18:3_18:3)+AcO	836.5	277.2	5.7	-80	-50
PC(18:3_19:0)+AcO	856.6	297.3	7.31	-80	-50
PC(18:3_20:0)+AcO	870.6	277.2	7.5	-80	-50
PC(18:3_20:1)+AcO	868.6	277.2	6.99	-80	-50
PC(18:3_20:2)+AcO	866.6	277.2	6.69	-80	-50
PC(18:3_20:3)+AcO	864.6	277.2	6.15	-80	-50
PC(18:3_20:4)+AcO	862.6	277.2	6.06	-80	-50
PC(18:3_20:5)+AcO	860.5	277.2	5.77	-80	-50
PC(18:3_22:4)+AcO	890.6	277.2	6.58	-80	-50
PC(18:3_22:5)+AcO	888.6	277.2	6.2	-80	-50
PC(18:3_22:6)+AcO	886.6	277.2	5.95	-80	-50
PC(19:0_19:0)+AcO	876.7	297.3	6.5	-80	-50
PC(19:0_20:0)+AcO	890.7	297.3	6.7	-80	-50
PC(19:0_20:1)+AcO	888.7	297.3	6.41	-80	-50
PC(19:0_20:2)+AcO	886.7	297.3	6.22	-80	-50
PC(19:0_20:3)+AcO	884.6	297.3	5.76	-80	-50
PC(19:0_20:4)+AcO	882.6	297.3	5.54	-80	-50
PC(19:0_20:5)+AcO	880.6	297.3	5.32	-80	-50
PC(19:0_22:4)+AcO	910.7	297.3	6.37	-80	-50
PC(19:0_22:5)+AcO	908.6	297.3	5.88	-80	-50
PC(19:0_22:6)+AcO	906.6	297.3	5.3	-80	-50
PC(20:0_20:0)+AcO	904.7	311.3	8.89	-80	-50
PC(20:0_20:1)+AcO	902.7	309.3	8.5	-80	-50
PC(20:0_20:2)+AcO	900.7	307.3	8.15	-80	-50
PC(20:0_20:3)+AcO	898.7	305.2	7.87	-80	-50
PC(20:0_20:4)+AcO	896.6	303.2	7.69	-80	-50
PC(20:0_20:5)+AcO	894.6	301.2	7.41	-80	-50
PC(20:0_22:4)+AcO	924.7	331.3	8	-80	-50
PC(20:0_22:5)+AcO	922.7	329.2	7.81	-80	-50
PC(20:0_22:6)+AcO	920.6	327.2	7.65	-80	-50
PC(20:1_20:1)+AcO	900.7	309.3	8.06	-80	-50
PC(20:1_20:2)+AcO	898.7	307.3	7.75	-80	-50
PC(20:1_20:3)+AcO	896.6	305.2	7.44	-80	-50
PC(20:1_20:4)+AcO	894.6	303.2	7.37	-80	-50
PC(20:1_20:5)+AcO	892.6	301.2	7.06	-80	-50
PC(20:1_22:4)+AcO	922.7	331.3	7.73	-80	-50
PC(20:1_22:5)+AcO	920.6	329.3	7.31	-80	-50
PC(20:1_22:6)+AcO	918.6	327.2	7.26	-80	-50
PC(20:2_20:2)+AcO	896.6	307.3	7.48	-80	-50
PC(20:2_20:3)+AcO	894.6	305.2	7.18	-80	-50
PC(20:2_20:4)+AcO	892.6	303.2	6.97	-80	-50
PC(20:2_20:5)+AcO	890.6	301.2	6.49	-80	-50
PC(20:2_22:4)+AcO	920.6	331.3	8.05	-80	-50
PC(20:2_22:5)+AcO	918.6	329.2	6.89	-80	-50
PC(20:2_22:6)+AcO	916.6	327.2	6.73	-80	-50
PC(20:3_20:3)+AcO	892.6	305.2	6.74	-80	-50
PC(20:3_20:4)+AcO	890.6	303.2	6.47	-80	-50
PC(20:3_20:5)+AcO	888.6	301.2	6.27	-80	-50
PC(20:3_22:4)+AcO	918.6	331.3	6.95	-80	-50
PC(20:3_22:5)+AcO	916.6	329.3	6.69	-80	-50
PC(20:3_22:6)+AcO	914.6	327.2	6.56	-80	-50
PC(20:4_20:4)+AcO	888.6	303.2	6.43	-80	-50
PC(20:4_20:5)+AcO	886.6	305.2	6.01	-80	-50
PC(20:4_22:4)+AcO	916.6	331.3	6.84	-80	-50
PC(20:4_22:5)+AcO	914.6	329.2	6.35	-80	-50
PC(20:4_22:6)+AcO	912.6	327.2	6.27	-80	-50
PC(20:5_20:5)+AcO	884.5	301.2	6.16	-80	-50
PC(20:5_22:4)+AcO	914.6	331.3	6.6	-80	-50
PC(20:5_22:5)+AcO	912.6	329.2	6.35	-80	-50
PC(20:5_22:6)+AcO	910.6	327.2	6.11	-80	-50
PC(22:4_22:4)+AcO	946.6	331.3	7.55	-80	-50
PC(22:4_22:5)+AcO	944.6	329.2	7.18	-80	-50
PC(22:4_22:6)+AcO	942.6	327.2	7.06	-80	-50
PC(22:5_22:5)+AcO	942.6	329.2	6.95	-80	-50
PC(22:5_22:6)+AcO	938.6	327.2	6.25	-80	-50
PC(22:6_22:6)+AcO	936.6	327.2	5.98	-80	-50
LPE(18:1-d7)-H_SPLASH.IS	485.3	288.3	2.67	-80	-50
LPE(14:0)-H	424.2	227.2	1.64	-80	-50
LPE(15:0)-H	438.3	241.2	2.1	-80	-50
LPE(16:0)-H	452.3	255.2	2.5	-80	-50
LPE(16:1)-H	450.3	253.2	1.85	-80	-50
LPE(17:0)-H	466.3	269.2	2.94	-80	-50
LPE(18:0)-H	480.3	283.3	3.4	-80	-50
LPE(18:1)-H	478.3	281.2	2.6	-80	-50
LPE(18:2)-H	476.3	279.2	2.08	-80	-50
LPE(18:3)-H	474.3	277.2	1.72	-80	-50
LPE(19:0)-H	494.3	297.3	3.89	-80	-50
LPE(20:0)-H	508.3	311.3	4.32	-80	-50
LPE(20:1)-H	506.3	309.3	3.36	-80	-50
LPE(20:2)-H	504.3	307.3	2.89	-80	-50
LPE(20:3)-H	502.3	305.2	2.26	-80	-50
LPE(20:4)-H	500.3	303.2	1.98	-80	-50
LPE(20:5)-H	498.3	301.2	1.67	-80	-50
LPE(22:4)-H	528.3	331.3	2.57	-80	-50
LPE(22:5)-H	526.3	329.2	2.31	-80	-50
LPE(22:6)-H	524.3	327.2	1.89	-80	-50
PE(15:0_18:1-d7)-H_SPLASH.IS	709.6	288.3	7.08	-80	-50
PE(14:0_14:0)-H	634.4	227.2	6.1	-80	-50
PE(14:0_15:0)-H	648.5	241.2	6.41	-80	-50
PE(14:0_16:0)-H	662.5	255.2	6.71	-80	-50
PE(14:0_16:1)-H	660.5	253.2	6.25	-80	-50
PE(14:0_17:0)-H	676.5	269.2	6.91	-80	-50
PE(14:0_18:0)-H	690.5	283.3	7.28	-80	-50
PE(14:0_18:1)-H	688.5	281.2	6.85	-80	-50
PE(14:0_18:2)-H	686.5	279.2	6.4	-80	-50
PE(14:0_18:3)-H	684.5	277.2	6.17	-80	-50
PE(14:0_19:0)-H	704.5	297.3	7.56	-80	-50
PE(14:0_20:0)-H	718.5	311.3	8.15	-80	-50
PE(14:0_20:1)-H	716.5	309.3	7.32	-80	-50
PE(14:0_20:2)-H	714.5	307.3	6.94	-80	-50
PE(14:0_20:3)-H	712.5	305.2	6.67	-80	-50
PE(14:0_20:4)-H	710.5	303.2	6.35	-80	-50
PE(14:0_20:5)-H	708.5	301.2	5.93	-80	-50
PE(14:0_22:4)-H	738.5	331.3	7.2	-80	-50
PE(14:0_22:5)-H	736.5	329.2	6.9	-80	-50
PE(14:0_22:6)-H	734.5	327.2	6.73	-80	-50
PE(15:0_15:0)-H	662.5	241.2	6.73	-80	-50
PE(15:0_16:0)-H	676.5	241.2	7	-80	-50
PE(15:0_16:1)-H	674.5	241.2	6.61	-80	-50
PE(15:0_17:0)-H	690.5	241.2	7.26	-80	-50
PE(15:0_18:0)-H	704.5	241.2	7.53	-80	-50
PE(15:0_18:1)-H	702.5	241.2	6.9	-80	-50
PE(15:0_18:2)-H	700.5	241.2	6.53	-80	-50
PE(15:0_18:3)-H	698.5	241.2	6.06	-80	-50
PE(15:0_19:0)-H	718.5	241.2	6.86	-80	-50
PE(15:0_20:0)-H	732.6	241.2	7.43	-80	-50
PE(15:0_20:1)-H	730.5	241.2	6.95	-80	-50
PE(15:0_20:2)-H	728.5	241.2	6.55	-80	-50
PE(15:0_20:3)-H	726.5	241.2	6.41	-80	-50
PE(15:0_20:4)-H	724.5	241.2	6.26	-80	-50
PE(15:0_20:5)-H	722.5	241.2	6.15	-80	-50
PE(15:0_22:4)-H	752.5	241.2	7.59	-80	-50
PE(15:0_22:5)-H	750.5	241.2	7.35	-80	-50
PE(15:0_22:6)-H	748.5	241.2	7.12	-80	-50
PE(16:0_16:0)-H	690.5	255.2	7.27	-80	-50
PE(16:0_16:1)-H	688.5	253.2	6.87	-80	-50
PE(16:0_18:1)-H	716.5	281.2	7.36	-80	-50
PE(16:0_18:2)-H	714.5	279.2	6.97	-80	-50
PE(16:0_18:3)-H	712.5	277.2	6.69	-80	-50
PE(16:0_20:0)-H	746.6	311.3	8.23	-80	-50
PE(16:0_20:1)-H	744.6	309.3	7.81	-80	-50
PE(16:0_20:2)-H	742.5	307.3	7.48	-80	-50
PE(16:0_20:3)-H	740.5	305.2	6.9	-80	-50
PE(16:0_20:4)-H	738.5	303.2	6.91	-80	-50
PE(16:0_20:5)-H	736.5	301.2	6.58	-80	-50
PE(16:0_22:4)-H	766.5	331.3	7.3	-80	-50
PE(16:0_22:5)-H	764.5	329.2	6.77	-80	-50
PE(16:0_22:6)-H	762.5	327.2	6.84	-80	-50
PE(17:0_17:0)-H	718.5	269.2	7.66	-80	-50
PE(17:0_18:0)-H	732.6	269.2	7.94	-80	-50
PE(17:0_18:1)-H	730.5	269.2	7.4	-80	-50
PE(17:0_18:2)-H	728.5	269.2	7.26	-80	-50
PE(17:0_18:3)-H	726.5	269.2	6.85	-80	-50
PE(17:0_19:0)-H	746.6	269.2	8.17	-80	-50
PE(17:0_20:0)-H	760.6	269.2	8.35	-80	-50
PE(17:0_20:1)-H	758.6	269.2	8.03	-80	-50
PE(17:0_20:2)-H	756.6	269.2	7.5	-80	-50
PE(17:0_20:3)-H	754.5	269.2	7.25	-80	-50
PE(17:0_20:4)-H	752.5	269.2	7.02	-80	-50
PE(17:0_20:5)-H	750.5	269.2	6.88	-80	-50
PE(17:0_22:4)-H	780.6	269.2	7.3	-80	-50
PE(17:0_22:5)-H	778.5	269.2	7.05	-80	-50
PE(17:0_22:6)-H	776.5	269.2	6.88	-80	-50
PE(18:0_18:0)-H	746.6	283.3	7.98	-80	-50
PE(18:0_18:1)-H	744.6	281.2	7.63	-80	-50
PE(18:0_18:2)-H	742.5	279.2	7.51	-80	-50
PE(18:0_18:3)-H	740.5	277.2	7.27	-80	-50
PE(18:0_20:0)-H	774.6	311.3	8.35	-80	-50
PE(18:0_20:1)-H	772.6	309.3	8.02	-80	-50
PE(18:0_20:2)-H	770.6	307.3	7.71	-80	-50
PE(18:0_20:3)-H	768.6	305.2	7.44	-80	-50
PE(18:0_20:4)-H	766.5	303.2	7.47	-80	-50
PE(18:0_20:5)-H	764.5	301.2	7.15	-80	-50
PE(18:0_22:4)-H	794.6	331.3	7.8	-80	-50
PE(18:0_22:5)-H	792.6	329.2	7.3	-80	-50
PE(18:0_22:6)-H	790.5	327.2	7.17	-80	-50
PE(18:1_18:1)-H	742.5	281.2	7.43	-80	-50
PE(18:1_18:2)-H	740.5	279.2	7.05	-80	-50
PE(18:1_18:3)-H	738.5	277.2	6.76	-80	-50
PE(18:1_20:0)-H	772.6	311.2	8.29	-80	-50
PE(18:1_20:1)-H	770.6	309.3	7.87	-80	-50
PE(18:1_20:2)-H	768.6	307.3	7.33	-80	-50
PE(18:1_20:3)-H	766.5	305.2	7.04	-80	-50
PE(18:1_20:4)-H	764.5	303.2	7.01	-80	-50
PE(18:1_20:5)-H	762.5	301.2	6.67	-80	-50
PE(18:1_22:4)-H	792.6	331.3	7.38	-80	-50
PE(18:1_22:5)-H	790.5	329.2	6.78	-80	-50
PE(18:1_22:6)-H	788.5	327.2	6.88	-80	-50
PE(18:2_18:2)-H	738.5	279.2	6.66	-80	-50
PE(18:2_18:3)-H	736.5	277.2	6.27	-80	-50
PE(18:2_20:0)-H	770.6	311.3	7.99	-80	-50
PE(18:2_20:1)-H	768.6	309.3	7.53	-80	-50
PE(18:2_20:2)-H	766.5	307.3	7.13	-80	-50
PE(18:2_20:3)-H	764.5	305.2	6.87	-80	-50
PE(18:2_20:4)-H	762.5	303.2	6.62	-80	-50
PE(18:2_20:5)-H	760.5	301.2	6.24	-80	-50
PE(18:2_22:4)-H	790.5	331.3	6.97	-80	-50
PE(18:2_22:5)-H	788.5	329.2	6.49	-80	-50
PE(18:2_22:6)-H	786.5	327.2	6.32	-80	-50
PE(19:0_19:0)-H	774.6	297.3	7.65	-80	-50
PE(19:0_20:0)-H	788.6	297.3	8.44	-80	-50
PE(19:0_20:1)-H	786.6	297.3	7.96	-80	-50
PE(19:0_20:2)-H	784.6	297.3	8.04	-80	-50
PE(19:0_20:3)-H	782.6	297.3	7.88	-80	-50
PE(19:0_20:4)-H	780.6	297.3	7.7	-80	-50
PE(19:0_20:5)-H	778.5	297.3	7.37	-80	-50
PE(19:0_22:4)-H	808.6	297.3	8.02	-80	-50
PE(19:0_22:5)-H	806.6	297.3	7.7	-80	-50
PE(19:0_22:6)-H	804.6	297.3	7.6	-80	-50
PE(20:0_20:0)-H	802.6	311.3	7.92	-80	-50
PE(20:0_20:1)-H	800.6	309.3	8.3	-80	-50
PE(20:0_20:2)-H	798.6	307.3	7.87	-80	-50
PE(20:0_20:3)-H	796.6	305.2	7.53	-80	-50
PE(20:0_20:4)-H	794.6	303.2	7.34	-80	-50
PE(20:0_20:5)-H	792.6	301.2	7.03	-80	-50
PE(20:0_22:4)-H	822.6	331.3	7.55	-80	-50
PE(20:0_22:5)-H	820.6	329.2	7.24	-80	-50
PE(20:0_22:6)-H	818.6	327.2	7.09	-80	-50
PE(20:1_20:1)-H	798.6	309.3	8.17	-80	-50
PE(20:1_20:2)-H	796.6	307.3	7.72	-80	-50
PE(20:1_20:3)-H	794.6	305.2	7.67	-80	-50
PE(20:1_20:4)-H	792.6	303.2	7.5	-80	-50
PE(20:1_20:5)-H	790.5	301.2	7.18	-80	-50
PE(20:1_22:4)-H	820.6	331.3	7.82	-80	-50
PE(20:1_22:5)-H	818.6	329.2	7.7	-80	-50
PE(20:1_22:6)-H	816.6	327.2	7.39	-80	-50
PE(20:2_20:2)-H	794.6	307.3	7.65	-80	-50
PE(20:2_20:3)-H	792.6	305.2	7.2	-80	-50
PE(20:2_20:4)-H	790.5	303.2	6.93	-80	-50
PE(20:2_20:5)-H	788.5	301.2	6.81	-80	-50
PE(20:2_22:4)-H	818.6	331.3	7.5	-80	-50
PE(20:2_22:5)-H	816.6	329.2	7.13	-80	-50
PE(20:2_22:6)-H	814.5	327.2	7.01	-80	-50
PE(20:3_20:3)-H	790.5	305.2	6.98	-80	-50
PE(20:3_20:4)-H	788.5	327.2	6.72	-80	-50
PE(20:3_20:5)-H	786.5	301.2	6.35	-80	-50
PE(20:3_22:4)-H	816.6	331.3	7.16	-80	-50
PE(20:3_22:5)-H	814.5	329.2	6.85	-80	-50
PE(20:3_22:6)-H	812.5	327.2	6.66	-80	-50
PE(20:4_20:4)-H	786.5	303.2	6.53	-80	-50
PE(20:4_20:5)-H	784.5	301.2	6.14	-80	-50
PE(20:4_22:4)-H	814.5	331.3	6.92	-80	-50
PE(20:4_22:5)-H	812.5	329.2	6.76	-80	-50
PE(20:4_22:6)-H	810.5	327.2	6.39	-80	-50
PE(20:5_20:5)-H	782.5	301.2	6.54	-80	-50
PE(20:5_22:4)-H	812.5	331.3	6.87	-80	-50
PE(20:5_22:5)-H	810.5	329.2	6.72	-80	-50
PE(20:5_26:6)-H	808.5	327.2	6.6	-80	-50
PE(22:4_22:4)-H	842.6	331.3	7.15	-80	-50
PE(22:4_22:5)-H	840.6	329.2	6.85	-80	-50
PE(22:4_22:6)-H	838.5	327.2	6.68	-80	-50
PE(22:5_22:5)-H	838.5	329.2	6.46	-80	-50
PE(22:5_22:6)-H	836.5	327.2	6.43	-80	-50
PE(22:6_22:6)-H	834.5	327.2	6.43	-80	-50
PE(O-16:0_16:0)-H	676.529	255.2	7.62	-80	-50
PE(O-16:0_16:1)-H	674.513	253.217	7.22	-80	-50
PE(O-16:0_18:0)-H	704.56	283.264	8.1	-80	-50
PE(O-16:0_18:1)-H	702.544	281.249	7.7	-80	-50
PE(O-16:0_18:2)-H	700.529	279.233	7.3	-80	-50
PE(O-16:0_18:3)-H	698.513	277.217	6.97	-80	-50
PE(O-16:0_20:1)-H	730.576	309.28	8.12	-80	-50
PE(O-16:0_20:2)-H	728.56	307.264	7.82	-80	-50
PE(O-16:0_20:3)-H	726.544	305.249	7.3	-80	-50
PE(O-16:0_20:4)-H	724.529	303.233	7.1	-80	-50
PE(O-16:0_20:5)-H	722.513	301.217	6.75	-80	-50
PE(O-16:0_22:4)-H	752.56	331.264	7.44	-80	-50
PE(O-16:0_22:5)-H	750.544	329.249	7.29	-80	-50
PE(O-16:0_22:6)-H	748.529	327.233	7.18	-80	-50
PE(O-18:0_16:0)-H	704.56	255.233	8.1	-80	-50
PE(O-18:0_16:1)-H	702.544	253.217	7.73	-80	-50
PE(O-18:0_18:0)-H	732.591	283.264	8.5	-80	-50
PE(O-18:0_18:1)-H	730.576	281.249	8.12	-80	-50
PE(O-18:0_18:2)-H	728.56	279.233	7.83	-80	-50
PE(O-18:0_18:3)-H	726.544	277.217	7.58	-80	-50
PE(O-18:0_20:1)-H	758.607	309.28	8.5	-80	-50
PE(O-18:0_20:2)-H	756.591	307.264	8.24	-80	-50
PE(O-18:0_20:3)-H	754.576	305.249	7.96	-80	-50
PE(O-18:0_20:4)-H	752.56	303.233	7.78	-80	-50
PE(O-18:0_20:5)-H	750.544	301.217	7.46	-80	-50
PE(O-18:0_22:4)-H	780.591	331.264	7.88	-80	-50
PE(O-18:0_22:5)-H	778.576	329.249	7.61	-80	-50
PE(O-18:0_22:6)-H	776.56	327.233	7.48	-80	-50
LPG(14:0)	455.241	227.202	2.23	-80	-50
LPG(16:0)	483.273	255.233	3.15	-80	-50
LPG(16:1)	481.257	253.217	2.44	-80	-50
LPG(18:0)	511.304	283.264	4.14	-80	-50
LPG(18:1)	509.289	281.249	3.35	-80	-50
LPG(18:2)	507.273	279.233	2.71	-80	-50
LPG(18:3)	505.257	277.217	2.21	-80	-50
LPG(20:0)	539.335	311.3	5.11	-80	-50
LPG(20:1)	537.32	309.28	4.29	-80	-50
LPG(20:2)	535.304	307.264	3.64	-80	-50
LPG(20:3)	533.289	305.249	3.05	-80	-50
LPG(20:4)	531.273	303.233	2.27	-80	-50
LPG(20:5)	529.257	301.217	2.21	-80	-50
LPG(22:4)	559.304	331.264	3.25	-80	-50
LPG(22:5)	557.289	329.249	2.75	-80	-50
LPG(22:6)	555.273	327.233	2.23	-80	-50
PG(15:0_18:1-d7)-H_SPLASH.IS	740.6	288.3	6.22	-80	-50
PG(14:0_14:0)-H	665.4	227.2	5.21	-80	-50
PG(14:0_15:0)-H	679.5	241.2	6.03	-80	-50
PG(14:0_16:0)-H	693.5	227.2	5.85	-80	-50
PG(14:0_16:1)-H	691.5	253.2	5.39	-80	-50
PG(14:0_17:0)-H	707.5	269.2	6.15	-80	-50
PG(14:0_18:0)-H	721.5	227.2	6.4	-80	-50
PG(14:0_18:1)-H	719.5	281.2	5.92	-80	-50
PG(14:0_18:2)-H	717.5	279.2	5.56	-80	-50
PG(14:0_18:3)-H	715.5	277.2	5.19	-80	-50
PG(14:0_19:0)-H	735.5	297.3	6.65	-80	-50
PG(14:0_20:1)-H	747.5	309.3	7.65	-80	-50
PG(14:0_20:2)-H	745.5	307.3	7.52	-80	-50
PG(14:0_20:3)-H	743.5	305.2	7.12	-80	-50
PG(14:0_20:4)-H	741.5	303.2	6.92	-80	-50
PG(14:0_20:5)-H	739.5	301.2	6.91	-80	-50
PG(14:0_22:4)-H	769.5	331.3	7.31	-80	-50
PG(14:0_22:5)-H	767.5	329.2	6.98	-80	-50
PG(14:0_22:6)-H	765.5	327.2	6.84	-80	-50
PG(15:0_15:0)-H	693.5	241.2	5.82	-80	-50
PG(15:0_16:0)-H	707.5	241.2	6.13	-80	-50
PG(15:0_16:1)-H	705.5	241.2	5.85	-80	-50
PG(15:0_17:0)-H	721.5	241.2	6.91	-80	-50
PG(15:0_18:0)-H	735.5	241.2	6.67	-80	-50
PG(15:0_18:1)-H	733.5	241.2	6.21	-80	-50
PG(15:0_18:2)-H	731.5	241.2	6.94	-80	-50
PG(15:0_18:3)-H	729.5	241.2	6.45	-80	-50
PG(15:0_19:0)-H	749.5	241.2	6.35	-80	-50
PG(15:0_20:0)-H	763.5	241.2	6.65	-80	-50
PG(15:0_20:1)-H	761.5	241.2	6.45	-80	-50
PG(15:0_20:2)-H	759.5	241.2	6.4	-80	-50
PG(15:0_20:3)-H	757.5	241.2	6.35	-80	-50
PG(15:0_20:4)-H	755.5	241.2	6.09	-80	-50
PG(15:0_20:5)-H	753.5	241.2	6.11	-80	-50
PG(15:0_22:4)-H	783.5	241.2	7.15	-80	-50
PG(15:0_22:5)-H	781.5	241.2	6.85	-80	-50
PG(15:0_22:6)-H	779.5	241.2	6.86	-80	-50
PG(16:0_16:0)-H	721.5	255.2	6.39	-80	-50
PG(16:0_16:1)-H	719.5	253.2	5.96	-80	-50
PG(16:0_17:0)-H	735.5	269.2	6.66	-80	-50
PG(16:0_18:0)-H	749.5	283.3	6.91	-80	-50
PG(16:0_18:1)-H	747.5	281.2	6.46	-80	-50
PG(16:0_18:2)-H	745.5	279.2	6.11	-80	-50
PG(16:0_18:3)-H	743.5	277.2	5.85	-80	-50
PG(16:0_19:0)-H	763.5	297.3	6.71	-80	-50
PG(16:0_20:0)-H	777.6	311.3	7.79	-80	-50
PG(16:0_20:1)-H	775.5	309.3	6.95	-80	-50
PG(16:0_20:2)-H	773.5	307.3	6.59	-80	-50
PG(16:0_20:3)-H	771.5	305.2	6.28	-80	-50
PG(16:0_20:4)-H	769.5	303.2	6.07	-80	-50
PG(16:0_20:5)-H	767.5	301.2	5.71	-80	-50
PG(16:0_22:4)-H	797.5	331.3	6.19	-80	-50
PG(16:0_22:5)-H	795.5	329.2	5.88	-80	-50
PG(16:0_22:6)-H	793.5	327.2	5.7	-80	-50
PG(16:1_16:1)-H	719.5	253.2	5.95	-80	-50
PG(16:1_17:0)-H	733.5	269.2	7.92	-80	-50
PG(16:1_18:0)-H	747.5	253.2	8.93	-80	-50
PG(16:1_18:1)-H	745.5	281.2	7.85	-80	-50
PG(16:1_18:2)-H	743.5	279.2	7.51	-80	-50
PG(16:1_18:3)-H	743.5	277.2	6.95	-80	-50
PG(16:1_19:0)-H	761.5	297.3	6.74	-80	-50
PG(16:1_20:0)-H	775.5	253.2	7.03	-80	-50
PG(16:1_20:1)-H	773.5	309.3	8.24	-80	-50
PG(16:1_20:2)-H	771.5	307.3	7.98	-80	-50
PG(16:1_20:3)-H	769.5	305.2	7.44	-80	-50
PG(16:1_20:4)-H	767.5	303.2	7.47	-80	-50
PG(16:1_20:5)-H	765.5	301.2	7.12	-80	-50
PG(16:1_22:4)-H	795.5	331.3	7.79	-80	-50
PG(16:1_22:5)-H	793.5	329.2	7.29	-80	-50
PG(16:1_22:6)-H	791.5	327.2	7.35	-80	-50
PG(17:0_17:0)-H	749.5	269.2	6.57	-80	-50
PG(17:0_18:0)-H	763.5	269.2	6.73	-80	-50
PG(17:0_18:1)-H	761.5	269.2	6.73	-80	-50
PG(17:0_18:2)-H	759.5	269.2	7.46	-80	-50
PG(17:0_18:3)-H	757.5	269.2	7	-80	-50
PG(17:0_19:0)-H	777.6	269.2	7.09	-80	-50
PG(17:0_20:0)-H	791.6	269.2	7.61	-80	-50
PG(17:0_20:1)-H	789.6	269.2	6.9	-80	-50
PG(17:0_20:2)-H	787.5	269.2	6.56	-80	-50
PG(17:0_20:3)-H	785.5	269.2	6.4	-80	-50
PG(17:0_20:4)-H	783.5	269.2	6.35	-80	-50
PG(17:0_20:5)-H	781.5	269.2	6.34	-80	-50
PG(17:0_22:4)-H	811.5	269.2	7.92	-80	-50
PG(17:0_22:5)-H	809.5	269.2	7.34	-80	-50
PG(17:0_22:6)-H	807.5	269.2	7.27	-80	-50
PG(18:0_18:0)-H	777.6	283.3	7.68	-80	-50
PG(18:0_18:1)-H	775.5	281.2	6.97	-80	-50
PG(18:0_18:2)-H	773.5	279.2	6.66	-80	-50
PG(18:0_18:3)-H	771.5	277.2	6.3	-80	-50
PG(18:0_19:0)-H	791.6	297.3	7	-80	-50
PG(18:0_20:0)-H	805.6	283.3	7.51	-80	-50
PG(18:0_20:1)-H	803.6	309.3	7.15	-80	-50
PG(18:0_20:2)-H	801.6	307.3	7.07	-80	-50
PG(18:0_20:3)-H	799.5	305.2	6.81	-80	-50
PG(18:0_20:4)-H	797.5	303.2	6.63	-80	-50
PG(18:0_20:5)-H	795.5	301.2	6.25	-80	-50
PG(18:0_22:4)-H	825.6	331.3	6.69	-80	-50
PG(18:0_22:5)-H	823.5	329.2	6.39	-80	-50
PG(18:0_22:6)-H	821.5	327.2	6.25	-80	-50
PG(18:1_18:1)-H	773.5	281.2	6.56	-80	-50
PG(18:1_18:2)-H	771.5	279.2	5.85	-80	-50
PG(18:1_18:3)-H	769.5	277.2	5.2	-80	-50
PG(18:1_19:0)-H	789.6	297.3	6.95	-80	-50
PG(18:1_20:0)-H	803.6	311.3	7.19	-80	-50
PG(18:1_20:1)-H	801.6	309.3	6.43	-80	-50
PG(18:1_20:2)-H	799.5	307.3	6.48	-80	-50
PG(18:1_20:3)-H	797.5	305.2	5.74	-80	-50
PG(18:1_20:4)-H	795.5	303.2	5.53	-80	-50
PG(18:1_20:5)-H	793.5	301.2	5.17	-80	-50
PG(18:1_22:4)-H	823.5	331.3	6.27	-80	-50
PG(18:1_22:5)-H	821.5	329.2	5.59	-80	-50
PG(18:1_22:5)-H	819.5	327.2	5.43	-80	-50
PG(18:2_18:2)-H	769.5	279.2	6.91	-80	-50
PG(18:2_18:3)-H	767.5	277.2	6.65	-80	-50
PG(18:2_19:0)-H	787.5	297.3	8.44	-80	-50
PG(18:2_20:0)-H	801.6	311.3	8.62	-80	-50
PG(18:2_20:1)-H	799.5	309.3	8.17	-80	-50
PG(18:2_20:2)-H	797.5	307.3	7.72	-80	-50
PG(18:2_20:3)-H	795.5	305.2	7.5	-80	-50
PG(18:2_20:4)-H	793.5	303.2	6.87	-80	-50
PG(18:2_20:5)-H	791.5	301.2	6.53	-80	-50
PG(18:2_22:4)-H	821.5	331.3	7.82	-80	-50
PG(18:2_22:5)-H	819.5	329.2	7.54	-80	-50
PG(18:2_22:6)-H	817.5	327.2	7.39	-80	-50
PG(18:3_18:3)-H	765.5	277.2	6.09	-80	-50
PG(18:3_19:0)-H	785.5	297.3	7.63	-80	-50
PG(18:3_20:0)-H	799.5	311.3	7.88	-80	-50
PG(18:3_20:1)-H	797.5	309.3	7.77	-80	-50
PG(18:3_20:2)-H	795.5	307.3	7.42	-80	-50
PG(18:3_20:3)-H	793.5	305.2	7.15	-80	-50
PG(18:3_20:4)-H	791.5	303.2	6.95	-80	-50
PG(18:3_20:5)-H	789.5	301.2	6.65	-80	-50
PG(18:3_22:4)-H	819.5	331.3	7.47	-80	-50
PG(18:3_22:5)-H	817.5	329.2	7	-80	-50
PG(18:3_22:6)-H	815.5	327.2	6.84	-80	-50
PG(19:0_19:0)-H	805.6	297.3	7.59	-80	-50
PG(19:0_20:0)-H	819.6	297.3	8.01	-80	-50
PG(19:0_20:1)-H	817.6	297.3	7.38	-80	-50
PG(19:0_20:2)-H	815.6	297.3	6.99	-80	-50
PG(19:0_20:3)-H	813.6	297.3	6.54	-80	-50
PG(19:0_20:4)-H	811.5	297.3	6.35	-80	-50
PG(19:0_20:5)-H	809.5	297.3	6.23	-80	-50
PG(19:0_22:4)-H	839.6	297.3	6.83	-80	-50
PG(19:0_22:5)-H	837.6	297.3	6.76	-80	-50
PG(19:0_22:6)-H	835.5	297.3	6.33	-80	-50
PG(20:0_20:0)-H	799.5	277.2	8.2	-80	-50
PG(20:0_20:1)-H	831.6	309.3	7.99	-80	-50
PG(20:0_20:2)-H	829.6	307.3	7.61	-80	-50
PG(20:0_20:3)-H	827.6	305.2	6.94	-80	-50
PG(20:0_20:4)-H	825.6	303.2	6.89	-80	-50
PG(20:0_20:5)-H	823.5	301.2	6.71	-80	-50
PG(20:0_22:4)-H	853.6	331.3	7.19	-80	-50
PG(20:0_22:5)-H	851.6	329.2	6.88	-80	-50
PG(20:0_22:6)-H	849.6	327.2	6.74	-80	-50
PG(20:1_20:1)-H	829.6	309.3	8.39	-80	-50
PG(20:1_20:2)-H	827.6	307.3	8.09	-80	-50
PG(20:1_20:3)-H	825.6	305.2	7.16	-80	-50
PG(20:1_20:4)-H	823.5	303.2	6.9	-80	-50
PG(20:1_20:5)-H	821.5	301.2	6.75	-80	-50
PG(20:1_22:4)-H	851.6	331.3	7.4	-80	-50
PG(20:1_22:5)-H	849.6	329.2	7.12	-80	-50
PG(20:1_22:6)-H	847.5	327.2	6.6	-80	-50
PG(20:2_20:2)-H	825.6	307.3	8.28	-80	-50
PG(20:2_20:3)-H	823.5	305.2	8.1	-80	-50
PG(20:2_20:4)-H	821.5	303.2	7.98	-80	-50
PG(20:2_20:5)-H	819.5	301.2	7.69	-80	-50
PG(20:2_22:4)-H	849.6	331.3	6.87	-80	-50
PG(20:2_22:5)-H	847.5	329.2	6.11	-80	-50
PG(20:2_22:6)-H	845.5	327.2	6.41	-80	-50
PG(20:3_20:3)-H	821.5	305.2	7.93	-80	-50
PG(20:3_20:4)-H	819.5	303.2	7.63	-80	-50
PG(20:3_20:5)-H	817.5	301.2	7.32	-80	-50
PG(20:3_22:4)-H	847.5	331.3	5.74	-80	-50
PG(20:3_22:5)-H	845.5	329.2	5.55	-80	-50
PG(20:3_22:6)-H	843.5	327.2	5.2	-80	-50
PG(20:4_20:4)-H	817.5	303.2	7.32	-80	-50
PG(20:4_20:5)-H	815.5	301.2	6.42	-80	-50
PG(20:4_22:4)-H	845.5	331.3	5.85	-80	-50
PG(20:4_22:5)-H	843.5	329.2	5.48	-80	-50
PG(20:4_22:6)-H	841.5	327.2	5.34	-80	-50
PG(20:5_20:5)-H	813.5	301.2	6.45	-80	-50
PG(20:5_22:4)-H	843.5	331.3	7.31	-80	-50
PG(20:5_22:5)-H	841.5	329.2	7.15	-80	-50
PG(20:5_22:6)-H	839.5	327.2	6.86	-80	-50
PG(22:4_22:4)-H	873.6	331.3	6.01	-80	-50
PG(22:4_22:5)-H	871.5	329.2	5.92	-80	-50
PG(22:4_22:6)-H	869.5	327.2	5.79	-80	-50
PG(22:5_22:5)-H	869.5	329.2	5.65	-80	-50
PG(22:5_22:6)-H	867.5	327.2	5.27	-80	-50
PG(22:6_22:6)-H	865.5	327.2	5.24	-80	-50
LPI(17:1-d7)-H_Lyso.IS	583.3	267.2	1.62	-80	-50
LPI(14:0)-H	543.3	227.2	2.28	-80	-50
LPI(15:0)-H	557.3	241.2	2.72	-80	-50
LPI(16:0)-H	571.3	255.2	3.2	-80	-50
LPI(16:1)-H	569.3	253.2	2.5	-80	-50
LPI(17:0)-H	585.3	269.2	2.15	-80	-50
LPI(18:0)-H	599.3	283.3	2.55	-80	-50
LPI(18:1)-H	597.3	281.2	1.96	-80	-50
LPI(18:2)-H	595.3	279.2	1.54	-80	-50
LPI(18:3)-H	593.3	277.2	1.22	-80	-50
LPI(19:0)-H	613.3	297.3	3.12	-80	-50
LPI(20:0)-H	627.4	311.3	3.41	-80	-50
LPI(20:1)-H	625.3	309.3	2.66	-80	-50
LPI(20:2)-H	623.3	307.3	2.11	-80	-50
LPI(20:3)-H	621.3	305.2	1.84	-80	-50
LPI(20:4)-H	619.3	303.2	1.49	-80	-50
LPI(20:5)-H	617.3	301.2	1.19	-80	-50
LPI(22:4)-H	647.3	331.3	1.98	-80	-50
LPI(22:5)-H	645.3	329.2	1.44	-80	-50
LPI(22:6)-H	643.3	327.2	1.44	-80	-50
PI(15:0_18:1-d7)-H_SPLASH.IS	828.6	288.3	6.06	-80	-60
PI(14:0_14:0)-H	753.5	227.2	6.59	-80	-60
PI(14:0_15:0)-H	767.5	241.2	6.92	-80	-60
PI(14:0_16:0)-H	781.5	255.2	7.13	-80	-60
PI(14:0_16:1)-H	779.5	253.2	7.1	-80	-60
PI(14:0_17:0)-H	795.5	269.2	7.66	-80	-60
PI(14:0_18:0)-H	809.5	283.3	7.85	-80	-60
PI(14:0_18:1)-H	807.5	281.2	7.59	-80	-60
PI(14:0_18:2)-H	805.5	279.2	7.51	-80	-60
PI(14:0_18:3)-H	803.5	277.2	7.3	-80	-60
PI(14:0_19:0)-H	823.5	297.3	8	-80	-60
PI(14:0_20:0)-H	837.5	311.3	8.23	-80	-60
PI(14:0_20:1)-H	835.5	309.3	8.07	-80	-60
PI(14:0_20:2)-H	833.5	307.3	7.78	-80	-60
PI(14:0_20:3)-H	831.5	305.2	7.59	-80	-60
PI(14:0_20:4)-H	829.5	303.2	7.47	-80	-60
PI(14:0_20:5)-H	827.5	301.2	7.15	-80	-60
PI(14:0_22:4)-H	857.5	331.3	7.8	-80	-60
PI(14:0_22:5)-H	855.5	329.2	7.67	-80	-60
PI(14:0_22:6)-H	853.5	327.2	7.37	-80	-60
PI(15:0_15:0)-H	781.5	241.2	6.86	-80	-60
PI(15:0_16:0)-H	795.5	241.2	6.74	-80	-60
PI(15:0_16:1)-H	793.5	241.2	6.32	-80	-60
PI(15:0_17:0)-H	809.5	241.2	6.24	-80	-60
PI(15:0_18:0)-H	823.5	241.2	6.35	-80	-60
PI(15:0_18:1)-H	821.5	241.2	6.07	-80	-60
PI(15:0_18:2)-H	819.5	241.2	5.63	-80	-60
PI(15:0_18:3)-H	817.5	241.2	5.74	-80	-60
PI(15:0_19:0)-H	837.5	241.2	6.77	-80	-60
PI(15:0_20:0)-H	851.6	241.2	7.59	-80	-60
PI(15:0_20:1)-H	849.5	241.2	7.24	-80	-60
PI(15:0_20:2)-H	847.5	241.2	6.84	-80	-60
PI(15:0_20:3)-H	845.5	241.2	6.66	-80	-60
PI(15:0_20:4)-H	843.5	241.2	6.23	-80	-60
PI(15:0_20:5)-H	841.5	241.2	6.13	-80	-60
PI(15:0_22:4)-H	871.5	241.2	6.49	-80	-60
PI(15:0_22:5)-H	869.5	241.2	6.29	-80	-60
PI(15:0_22:6)-H	867.5	241.2	6.19	-80	-60
PI(16:0_16:0)-H	809.5	255.2	6.24	-80	-60
PI(16:0_16:1)-H	807.5	253.2	5.78	-80	-60
PI(16:0_17:0)-H	823.5	269.2	6.1	-80	-60
PI(16:0_18:0)-H	837.6	283.3	6.47	-80	-60
PI(16:0_18:1)-H	835.5	281.2	6.33	-80	-60
PI(16:0_18:2)-H	833.5	279.2	5.94	-80	-60
PI(16:0_18:3)-H	814.6	277.2	5.75	-80	-60
PI(16:0_19:0)-H	851.6	297.3	6.9	-80	-60
PI(16:0_20:0)-H	865.6	311.3	7.27	-80	-60
PI(16:0_20:1)-H	863.6	309.3	6.86	-80	-60
PI(16:0_20:2)-H	861.6	307.3	6.41	-80	-60
PI(16:0_20:3)-H	859.5	305.2	6.12	-80	-60
PI(16:0_20:4)-H	857.5	303.2	5.92	-80	-60
PI(16:0_20:5)-H	855.5	301.2	5.55	-80	-60
PI(16:0_22:4)-H	885.6	331.3	6.32	-80	-60
PI(16:0_22:5)-H	883.5	329.2	5.94	-80	-60
PI(16:0_22:6)-H	881.5	327.2	5.81	-80	-60
PI(16:1_16:1)-H	805.5	253.2	5.36	-80	-60
PI(16:1_17:0)-H	821.5	269.2	6.16	-80	-60
PI(16:1_18:0)-H	835.5	283.3	6.42	-80	-60
PI(16:1_18:1)-H	833.5	281.2	5.95	-80	-60
PI(16:1_18:2)-H	831.5	279.2	5.52	-80	-60
PI(16:1_18:3)-H	829.5	277.2	5.35	-80	-60
PI(16:1_19:0)-H	849.5	297.3	6.72	-80	-60
PI(16:1_20:0)-H	863.6	253.2	6.9	-80	-60
PI(16:1_20:1)-H	861.5	309.3	6.51	-80	-60
PI(16:1_20:2)-H	859.5	307.3	6.07	-80	-60
PI(16:1_20:3)-H	857.5	305.2	5.72	-80	-60
PI(16:1_20:4)-H	855.5	303.2	5.45	-80	-60
PI(16:1_20:5)-H	853.5	301.2	5.22	-80	-60
PI(16:1_22:4)-H	883.5	331.3	5.89	-80	-60
PI(16:1_22:5)-H	881.5	329.2	5.53	-80	-60
PI(16:1_22:6)-H	879.5	327.2	5.34	-80	-60
PI(17:0_17:0)-H	837.6	269.2	6.67	-80	-60
PI(17:0_18:0)-H	851.6	269.2	6.94	-80	-60
PI(17:0_18:1)-H	849.5	269.2	6.6	-80	-60
PI(17:0_18:2)-H	847.5	269.2	6.23	-80	-60
PI(17:0_18:3)-H	845.5	269.2	6.04	-80	-60
PI(17:0_19:0)-H	865.6	269.2	7.15	-80	-60
PI(17:0_20:0)-H	879.6	269.2	6.96	-80	-60
PI(17:0_20:1)-H	877.6	269.2	6.98	-80	-60
PI(17:0_20:2)-H	875.6	269.2	6.74	-80	-60
PI(17:0_20:3)-H	873.5	269.2	6.13	-80	-60
PI(17:0_20:4)-H	871.5	269.2	5.93	-80	-60
PI(17:0_20:5)-H	869.5	269.2	5.58	-80	-60
PI(17:0_22:4)-H	899.6	269.2	6.58	-80	-60
PI(17:0_22:5)-H	897.5	269.2	6.24	-80	-60
PI(17:0_22:6)-H	895.5	269.2	6.09	-80	-60
PI(18:0_18:0)-H	865.6	283.3	7.17	-80	-60
PI(18:0_18:1)-H	863.6	281.2	6.88	-80	-60
PI(18:0_18:2)-H	861.6	279.2	6.52	-80	-60
PI(18:0_18:3)-H	859.5	277.2	5.98	-80	-60
PI(18:0_19:0)-H	879.6	297.3	7.11	-80	-60
PI(18:0_20:0)-H	893.6	311.3	7.69	-80	-60
PI(18:0_20:1)-H	891.6	309.3	7.29	-80	-60
PI(18:0_20:2)-H	889.6	307.3	6.67	-80	-60
PI(18:0_20:3)-H	887.6	305.2	6.4	-80	-60
PI(18:0_20:4)-H	885.6	303.2	6.2	-80	-60
PI(18:0_20:5)-H	883.5	301.2	5.88	-80	-60
PI(18:0_22:4)-H	913.6	331.3	6.55	-80	-60
PI(18:0_22:5)-H	911.6	329.2	6.4	-80	-60
PI(18:0_22:6)-H	909.6	327.2	6.37	-80	-60
PI(18:1_18:1)-H	861.6	281.2	6.39	-80	-60
PI(18:1_18:2)-H	859.5	279.2	6.04	-80	-60
PI(18:1_18:3)-H	857.5	277.2	5.8	-80	-60
PI(18:1_19:0)-H	877.6	297.3	6.8	-80	-60
PI(18:1_20:0)-H	891.6	311.3	7.05	-80	-60
PI(18:1_20:1)-H	889.6	309.3	6.89	-80	-60
PI(18:1_20:2)-H	887.6	307.3	6.57	-80	-60
PI(18:1_20:3)-H	885.6	305.2	6.2	-80	-60
PI(18:1_20:4)-H	883.5	303.2	6	-80	-60
PI(18:1_20:5)-H	881.5	301.2	5.64	-80	-60
PI(18:1_22:4)-H	911.6	331.3	6.38	-80	-60
PI(18:1_22:5)-H	909.6	329.2	6.03	-80	-60
PI(18:1_22:6)-H	907.5	327.2	5.89	-80	-60
PI(18:2_18:2)-H	857.5	279.2	5.61	-80	-60
PI(18:2_18:3)-H	855.5	277.2	5.5	-80	-60
PI(18:2_19:0)-H	875.6	297.3	6.76	-80	-60
PI(18:2_20:0)-H	889.6	311.3	7.02	-80	-60
PI(18:2_20:1)-H	887.6	309.3	6.56	-80	-60
PI(18:2_20:2)-H	885.6	307.3	6.21	-80	-60
PI(18:2_20:3)-H	883.5	305.2	6.09	-80	-60
PI(18:2_20:4)-H	881.5	303.2	5.58	-80	-60
PI(18:2_20:5)-H	879.5	301.2	5.2	-80	-60
PI(18:2_22:4)-H	909.6	331.3	7.57	-80	-60
PI(18:2_22:5)-H	907.5	329.2	7.28	-80	-60
PI(18:2_22:6)-H	905.5	327.2	7.11	-80	-60
PI(18:3_18:3)-H	853.5	277.2	6.87	-80	-60
PI(18:3_19:0)-H	873.5	297.3	6.58	-80	-60
PI(18:3_20:0)-H	887.6	311.3	6.87	-80	-60
PI(18:3_20:1)-H	885.5	309.3	8.16	-80	-60
PI(18:3_20:2)-H	883.5	307.3	7.82	-80	-60
PI(18:3_20:3)-H	881.5	305.2	7.52	-80	-60
PI(18:3_20:4)-H	879.5	303.2	7.3	-80	-60
PI(18:3_20:5)-H	877.5	301.2	7.05	-80	-60
PI(18:3_22:4)-H	907.5	331.3	7.3	-80	-60
PI(18:3_22:5)-H	905.5	329.2	7.05	-80	-60
PI(18:3_22:6)-H	903.5	327.2	6.95	-80	-60
PI(19:0_19:0)-H	893.6	297.3	7.25	-80	-60
PI(19:0_20:0)-H	907.6	297.3	7.5	-80	-60
PI(19:0_20:1)-H	905.6	297.3	7.21	-80	-60
PI(19:0_20:2)-H	903.6	297.3	6.65	-80	-60
PI(19:0_20:3)-H	901.6	297.3	6.5	-80	-60
PI(19:0_20:4)-H	899.6	297.3	6.46	-80	-60
PI(19:0_20:5)-H	897.5	297.3	6.26	-80	-60
PI(19:0_22:4)-H	927.6	297.3	7.05	-80	-60
PI(19:0_22:5)-H	925.6	297.3	6.76	-80	-60
PI(19:0_22:6)-H	923.6	297.3	6.64	-80	-60
PI(20:0_20:0)-H	921.6	311.3	7.76	-80	-60
PI(20:0_20:1)-H	919.6	309.3	7.29	-80	-60
PI(20:0_20:2)-H	917.6	307.3	6.89	-80	-60
PI(20:0_20:3)-H	915.6	305.2	6.49	-80	-60
PI(20:0_20:4)-H	913.6	303.2	6.26	-80	-60
PI(20:0_20:5)-H	911.6	301.2	5.85	-80	-60
PI(20:0_22:5)-H	939.6	329.2	6.33	-80	-60
PI(20:0_22:4)-H	939.6	331.3	6.88	-80	-60
PI(20:0_22:6)-H	937.6	327.2	6.13	-80	-60
PI(20:1_20:1)-H	917.6	309.3	7.38	-80	-60
PI(20:1_20:2)-H	915.6	307.3	7.03	-80	-60
PI(20:1_20:3)-H	913.6	305.2	6.45	-80	-60
PI(20:1_20:4)-H	911.6	303.2	6.25	-80	-60
PI(20:1_20:5)-H	909.5	301.2	6.18	-80	-60
PI(20:1_22:4)-H	939.6	331.3	6.89	-80	-60
PI(20:1_22:5)-H	937.6	329.2	6.65	-80	-60
PI(20:1_22:6)-H	935.6	327.2	6.42	-80	-60
PI(20:2_20:2)-H	913.6	307.3	6.35	-80	-60
PI(20:2_20:3)-H	911.6	305.2	6.15	-80	-60
PI(20:2_20:4)-H	909.5	303.2	5.84	-80	-60
PI(20:2_20:5)-H	907.5	301.2	5.77	-80	-60
PI(20:2_22:4)-H	965.6	331.3	8.82	-80	-60
PI(20:2_22:5)-H	963.6	329.2	8.62	-80	-60
PI(20:2_22:6)-H	961.6	327.2	8.46	-80	-60
PI(20:3_20:3)-H	909.5	305.2	6.19	-80	-60
PI(20:3_20:4)-H	907.5	303.2	5.84	-80	-60
PI(20:3_20:5)-H	905.5	301.2	5.43	-80	-60
PI(20:3_22:4)-H	935.6	331.3	8.11	-80	-60
PI(20:3_22:5)-H	933.5	329.2	7.83	-80	-60
PI(20:3_22:6)-H	931.5	327.2	7.68	-80	-60
PI(20:4_20:4)-H	905.5	303.2	5.51	-80	-60
PI(20:4_20:5)-H	903.5	301.2	5.36	-80	-60
PI(20:4_22:4)-H	933.5	331.3	5.91	-80	-60
PI(20:4_22:5)-H	931.5	329.2	5.58	-80	-60
PI(20:4_22:6)-H	929.5	327.2	5.09	-80	-60
PI(20:5_20:5)-H	901.5	301.2	6.92	-80	-60
PI(20:5_22:4)-H	931.5	331.3	6.35	-80	-60
PI(20:5_22:5)-H	929.5	329.2	6.15	-80	-60
PI(20:5_22:6)-H	927.5	327.2	5.89	-80	-60
PI(22:4_22:4)-H	961.6	331.3	8.46	-80	-60
PI(22:4_22:5)-H	959.6	329.2	8.22	-80	-60
PI(22:4_22:6)-H	957.5	327.2	8.08	-80	-60
PI(22:5_22:5)-H	957.5	329.2	7.04	-80	-60
PI(22:5_22:6)-H	955.5	327.2	6.94	-80	-60
PI(22:6_22:6)-H	953.5	327.2	6.94	-80	-60
PS(15:0_18:1-d7)-H_SPLASH.IS	753.5	288.3	7.65	-80	-50
PS(14:0_14:0)-H	678.4	227.2	6.57	-80	-50
PS(14:0_15:0)-H	692.5	241.2	6.87	-80	-50
PS(14:0_16:0)-H	706.5	255.2	7.14	-80	-50
PS(14:0_16:1)-H	704.5	253.2	6.72	-80	-50
PS(14:0_17:0)-H	720.5	269.2	7.41	-80	-50
PS(14:0_18:0)-H	734.5	283.3	7.63	-80	-50
PS(14:0_18:1)-H	732.5	281.2	7.24	-80	-50
PS(14:0_18:2)-H	730.5	279.2	6.84	-80	-50
PS(14:0_18:3)-H	728.5	277.2	6.36	-80	-50
PS(14:0_19:0)-H	748.5	297.3	7.25	-80	-50
PS(14:0_20:0)-H	762.5	311.3	7.44	-80	-50
PS(14:0_20:1)-H	760.5	309.3	7.33	-80	-50
PS(14:0_20:2)-H	758.5	307.3	6.89	-80	-50
PS(14:0_20:3)-H	756.5	305.2	6.33	-80	-50
PS(14:0_20:4)-H	754.5	303.2	7.19	-80	-50
PS(14:0_20:5)-H	752.5	301.2	6.87	-80	-50
PS(14:0_22:4)-H	782.5	331.3	8.12	-80	-50
PS(14:0_22:5)-H	780.5	329.2	7.82	-80	-50
PS(14:0_22:6)-H	778.5	327.2	7.69	-80	-50
PS(15:0_15:0)-H	706.5	241.2	6.84	-80	-50
PS(15:0_16:0)-H	720.5	241.2	6.87	-80	-50
PS(15:0_16:1)-H	718.5	241.2	6.89	-80	-50
PS(15:0_17:0)-H	734.5	241.2	6.18	-80	-50
PS(15:0_18:0)-H	748.5	241.2	7.12	-80	-50
PS(15:0_18:1)-H	746.5	241.2	7.11	-80	-50
PS(15:0_18:2)-H	744.5	241.2	6.55	-80	-50
PS(15:0_18:3)-H	742.5	241.2	6.22	-80	-50
PS(15:0_19:0)-H	762.5	241.2	6.84	-80	-50
PS(15:0_20:0)-H	776.5	241.2	7.65	-80	-50
PS(15:0_20:1)-H	774.5	241.2	7.63	-80	-50
PS(15:0_20:2)-H	772.5	241.2	7.17	-80	-50
PS(15:0_20:3)-H	770.5	241.2	6.92	-80	-50
PS(15:0_20:4)-H	768.5	241.2	6.48	-80	-50
PS(15:0_20:5)-H	766.5	241.2	6.28	-80	-50
PS(15:0_22:4)-H	796.5	241.2	6.93	-80	-50
PS(15:0_22:5)-H	794.5	241.2	6.55	-80	-50
PS(15:0_22:6)-H	792.5	241.2	6.14	-80	-50
PS(16:0_16:0)-H	734.5	255.2	6.3	-80	-50
PS(16:0_16:1)-H	732.5	253.2	5.84	-80	-50
PS(16:0_17:0)-H	748.5	269.2	6.58	-80	-50
PS(16:0_18:0)-H	762.5	283.3	6.84	-80	-50
PS(16:0_18:1)-H	760.5	281.2	6.39	-80	-50
PS(16:0_18:2)-H	758.5	279.2	6.06	-80	-50
PS(16:0_18:3)-H	739.5	277.2	6.78	-80	-50
PS(16:0_19:0)-H	776.5	297.3	7.07	-80	-50
PS(16:0_20:0)-H	790.6	311.3	7.33	-80	-50
PS(16:0_20:1)-H	788.5	309.3	6.89	-80	-50
PS(16:0_20:2)-H	786.5	307.3	6.57	-80	-50
PS(16:0_20:3)-H	784.5	305.2	6.18	-80	-50
PS(16:0_20:4)-H	782.5	303.2	5.97	-80	-50
PS(16:0_20:5)-H	780.5	301.2	5.62	-80	-50
PS(16:0_22:4)-H	810.5	331.3	6.35	-80	-50
PS(16:0_22:5)-H	808.5	329.2	5.9	-80	-50
PS(16:0_22:6)-H	806.5	327.2	5.86	-80	-50
PS(16:1_16:1)-H	730.5	253.2	6.73	-80	-50
PS(16:1_17:0)-H	746.5	269.2	6.19	-80	-50
PS(16:1_18:0)-H	760.5	283.3	6.52	-80	-50
PS(16:1_18:1)-H	758.5	281.2	6	-80	-50
PS(16:1_18:2)-H	756.5	279.2	5.67	-80	-50
PS(16:1_18:3)-H	754.5	277.2	5.35	-80	-50
PS(16:1_19:0)-H	774.5	297.3	6.75	-80	-50
PS(16:1_20:0)-H	788.5	311.3	7.03	-80	-50
PS(16:1_20:1)-H	786.5	309.3	6.56	-80	-50
PS(16:1_20:2)-H	784.5	307.3	6.15	-80	-50
PS(16:1_20:3)-H	782.5	305.2	5.78	-80	-50
PS(16:1_20:4)-H	780.5	303.2	5.55	-80	-50
PS(16:1_20:5)-H	778.5	301.2	5.35	-80	-50
PS(16:1_22:4)-H	808.5	331.3	5.91	-80	-50
PS(16:1_22:5)-H	806.5	329.2	5.58	-80	-50
PS(16:1_22:6)-H	804.5	327.2	5.3	-80	-50
PS(17:0_17:0)-H	762.5	269.2	6.73	-80	-50
PS(17:0_18:0)-H	776.5	269.2	7.09	-80	-50
PS(17:0_18:1)-H	774.5	269.2	6.69	-80	-50
PS(17:0_18:2)-H	772.5	269.2	6.3	-80	-50
PS(17:0_18:3)-H	770.5	269.2	6.04	-80	-50
PS(17:0_19:0)-H	790.6	269.2	6.88	-80	-50
PS(17:0_20:0)-H	804.6	269.2	6.99	-80	-50
PS(17:0_20:1)-H	802.6	269.2	7.15	-80	-50
PS(17:0_20:2)-H	800.5	269.2	6.87	-80	-50
PS(17:0_20:3)-H	798.5	269.2	6.27	-80	-50
PS(17:0_20:4)-H	796.5	269.2	6.26	-80	-50
PS(17:0_20:5)-H	794.5	269.2	5.92	-80	-50
PS(17:0_22:4)-H	824.5	269.2	6.65	-80	-50
PS(17:0_22:5)-H	822.5	269.2	6.28	-80	-50
PS(17:0_22:6)-H	820.5	269.2	6.16	-80	-50
PS(18:0_18:0)-H	790.6	283.3	7.35	-80	-50
PS(18:0_18:1)-H	788.5	281.2	6.89	-80	-50
PS(18:0_18:2)-H	786.5	279.2	6.56	-80	-50
PS(18:0_18:3)-H	784.5	277.2	6.16	-80	-50
PS(18:0_19:0)-H	804.6	297.3	7.6	-80	-50
PS(18:0_20:0)-H	818.6	311.3	7.84	-80	-50
PS(18:0_20:1)-H	816.6	309.3	7.4	-80	-50
PS(18:0_20:2)-H	814.6	307.3	6.81	-80	-50
PS(18:0_20:3)-H	812.5	305.2	6.51	-80	-50
PS(18:0_20:4)-H	810.5	303.2	6.32	-80	-50
PS(18:0_20:5)-H	808.5	301.2	5.97	-80	-50
PS(18:0_22:4)-H	838.6	331.3	6.89	-80	-50
PS(18:0_22:5)-H	836.5	329.2	6.41	-80	-50
PS(18:0_22:6)-H	834.5	327.2	6.24	-80	-50
PS(18:1_18:1)-H	786.5	281.2	6.52	-80	-50
PS(18:1_18:2)-H	784.5	279.2	6.1	-80	-50
PS(18:1_18:3)-H	782.5	277.2	5.79	-80	-50
PS(18:1_19:0)-H	802.6	297.3	7.21	-80	-50
PS(18:1_20:0)-H	816.6	311.3	7.43	-80	-50
PS(18:1_20:1)-H	814.6	309.3	7	-80	-50
PS(18:1_20:2)-H	812.5	307.3	6.65	-80	-50
PS(18:1_20:3)-H	810.5	305.2	6.27	-80	-50
PS(18:1_20:4)-H	808.5	303.2	6.06	-80	-50
PS(18:1_20:5)-H	806.5	301.2	5.66	-80	-50
PS(18:1_22:4)-H	836.5	331.3	6.42	-80	-50
PS(18:1_22:5)-H	834.5	329.2	6.09	-80	-50
PS(18:1_22:6)-H	832.5	327.2	5.95	-80	-50
PS(18:2_18:2)-H	782.5	279.2	6.92	-80	-50
PS(18:2_18:3)-H	780.5	277.2	6.75	-80	-50
PS(18:2_19:0)-H	800.5	297.3	6.87	-80	-50
PS(18:2_20:0)-H	814.6	311.3	7.13	-80	-50
PS(18:2_20:1)-H	812.5	309.3	6.67	-80	-50
PS(18:2_20:2)-H	810.5	307.3	6.28	-80	-50
PS(18:2_20:3)-H	808.5	305.2	5.99	-80	-50
PS(18:2_20:4)-H	806.5	303.2	6.17	-80	-50
PS(18:2_20:5)-H	804.5	301.2	5.22	-80	-50
PS(18:2_22:4)-H	834.5	331.3	8.84	-80	-50
PS(18:2_22:5)-H	832.5	329.2	8.63	-80	-50
PS(18:2_22:6)-H	830.5	327.2	8.52	-80	-50
PS(18:3_18:3)-H	778.5	277.2	7.05	-80	-50
PS(18:3_19:0)-H	798.5	297.3	8	-80	-50
PS(18:3_20:0)-H	812.5	311.3	8.48	-80	-50
PS(18:3_20:1)-H	810.5	309.3	8.08	-80	-50
PS(18:3_20:2)-H	808.5	307.3	7.8	-80	-50
PS(18:3_20:3)-H	806.5	305.2	7.43	-80	-50
PS(18:3_20:4)-H	804.5	303.2	7.25	-80	-50
PS(18:3_20:5)-H	802.5	301.2	6.82	-80	-50
PS(18:3_22:4)-H	832.5	331.3	7.59	-80	-50
PS(18:3_22:5)-H	830.5	329.2	7.28	-80	-50
PS(18:3_22:6)-H	828.5	327.2	7.1	-80	-50
PS(19:0_19:0)-H	818.6	297.3	7.35	-80	-50
PS(19:0_20:0)-H	832.6	297.3	8.26	-80	-50
PS(19:0_20:1)-H	830.6	297.3	7.64	-80	-50
PS(19:0_20:2)-H	828.6	297.3	7.78	-80	-50
PS(19:0_20:3)-H	826.6	297.3	6.94	-80	-50
PS(19:0_20:4)-H	824.5	297.3	6.85	-80	-50
PS(19:0_20:5)-H	822.5	297.3	6.52	-80	-50
PS(19:0_22:4)-H	852.6	297.3	7.17	-80	-50
PS(19:0_22:5)-H	850.6	297.3	6.9	-80	-50
PS(19:0_22:6)-H	848.5	297.3	6.76	-80	-50
PS(20:0_20:0)-H	846.6	311.3	8.45	-80	-50
PS(20:0_20:1)-H	844.6	309.3	8.07	-80	-50
PS(20:0_20:2)-H	842.6	307.3	6.89	-80	-50
PS(20:0_20:3)-H	840.6	305.2	6.54	-80	-50
PS(20:0_20:4)-H	838.6	303.2	6.31	-80	-50
PS(20:0_20:5)-H	836.5	301.2	5.92	-80	-50
PS(20:0_22:4)-H	864.6	331.3	6.65	-80	-50
PS(20:0_22:5)-H	864.6	329.2	6.36	-80	-50
PS(20:0_22:6)-H	862.6	327.2	6.18	-80	-50
PS(20:1_20:1)-H	842.6	309.3	7.46	-80	-50
PS(20:1_20:2)-H	840.6	307.3	7.13	-80	-50
PS(20:1_20:3)-H	838.6	305.2	6.88	-80	-50
PS(20:1_20:4)-H	836.5	303.2	6.6	-80	-50
PS(20:1_20:5)-H	834.5	301.2	6.55	-80	-50
PS(20:1_22:4)-H	864.6	331.3	6.94	-80	-50
PS(20:1_22:5)-H	862.6	329.2	6.89	-80	-50
PS(20:1_22:6)-H	860.5	327.2	6.54	-80	-50
PS(20:2_20:2)-H	838.6	307.3	8.24	-80	-50
PS(20:2_20:3)-H	836.5	305.2	7.99	-80	-50
PS(20:2_20:4)-H	834.5	303.2	7.79	-80	-50
PS(20:2_20:5)-H	832.5	301.2	7.44	-80	-50
PS(20:2_22:4)-H	890.6	331.3	6.55	-80	-50
PS(20:2_22:5)-H	888.6	329.2	6.11	-80	-50
PS(20:2_22:6)-H	886.6	327.2	5.96	-80	-50
PS(20:3_20:3)-H	834.5	305.2	7.93	-80	-50
PS(20:3_20:4)-H	832.5	303.2	7.75	-80	-50
PS(20:3_20:5)-H	830.5	301.2	7.42	-80	-50
PS(20:3_22:4)-H	860.5	331.3	7.84	-80	-50
PS(20:3_22:5)-H	858.5	329.2	7.56	-80	-50
PS(20:3_22:6)-H	856.5	327.2	7.42	-80	-50
PS(20:4_20:4)-H	830.5	303.2	7.29	-80	-50
PS(20:4_20:5)-H	828.5	301.2	6.97	-80	-50
PS(20:4_22:4)-H	858.5	331.3	7.65	-80	-50
PS(20:4_22:5)-H	856.5	329.2	7.35	-80	-50
PS(20:4_22:6)-H	854.5	327.2	7.16	-80	-50
PS(20:5_20:5)-H	826.5	301.2	6.35	-80	-50
PS(20:5_22:4)-H	856.5	331.3	7.52	-80	-50
PS(20:5_22:5)-H	854.5	329.2	7.05	-80	-50
PS(20:5_22:6)-H	852.5	327.2	6.75	-80	-50
PS(22:4_22:4)-H	886.6	331.3	6.03	-80	-50
PS(22:4_22:5)-H	884.5	329.2	5.68	-80	-50
PS(22:4_22:6)-H	882.5	327.2	5.53	-80	-50
PS(22:5_22:5)-H	882.5	329.2	5.54	-80	-50
PS(22:5_22:6)-H	880.5	327.2	5.34	-80	-50
PS(22:6_22:6)-H	878.5	327.2	5.34	-80	-50
CL(72:0_18:0)-2H	731.5	283.2	8.11	-80	-50
CL(72:1_18:0)-2H	730.5	283.2	8.12	-80	-50
CL(72:1_18:1)-2H	730.5	281.2	8.12	-80	-50
CL(72:2_18:0)-2H	729.5	283.2	8.1	-80	-50
CL(72:2_18:1)-2H	729.5	281.2	8.11	-80	-50
CL(72:2_18:2)-2H	729.5	279.2	7.84	-80	-50
CL(72:3_18:0)-2H	728.5	283.2	8.09	-80	-50
CL(72:3_18:1)-2H	728.5	281.2	8.11	-80	-50
CL(72:3_18:2)-2H	728.5	279.2	7.83	-80	-50
CL(72:4_18:0)-2H	727.5	283.2	7.85	-80	-50
CL(72:4_18:1)-2H	727.5	281.2	7.71	-80	-50
CL(72:4_18:2)-2H	727.5	279.2	7.79	-80	-50
CL(72:4_20:4)-2H	727.5	303.3	7.3	-80	-50
CL(72:5_18:0)-2H	726.5	283.2	7.47	-80	-50
CL(72:5_18:1)-2H	726.5	281.2	7.71	-80	-50
CL(72:5_18:2)-2H	726.5	279.2	7.79	-80	-50
CL(72:5_20:4)-2H	726.5	303.3	7.29	-80	-50
CL(72:6_18:0)-2H	725.5	283.2	7.35	-80	-50
CL(72:6_18:1)-2H	725.5	281.2	7.17	-80	-50
CL(72:6_18:2)-2H	725.5	279.2	7.33	-80	-50
CL(72:6_20:4)-2H	725.5	303.3	7.29	-80	-50
CL(72:8_18:0)-2H	723.4	283.2	6.88	-80	-50
CL(72:8_18:1)-2H	723.4	281.2	6.92	-80	-50
CL(72:8_18:2)-2H	723.4	279.2	6.95	-80	-50
CL(72:8_20:4)-2H	723.4	303.3	7.23	-80	-50
PA(15:0_18:1-d7)-H_SPLASH.IS	666.5	288.2	6.5	-80	-50
PA(14:0_14:0)-H	591.4	227.2	5.45	-80	-50
PA(14:0_15:0)-H	605.4	241.2	5.76	-80	-50
PA(14:0_16:0)-H	619.4	255.2	6.58	-80	-50
PA(14:0_16:1)-H	617.4	253.2	5.6	-80	-50
PA(14:0_17:0)-H	633.5	269.2	6.6	-80	-50
PA(14:0_18:0)-H	647.5	283.3	6.67	-80	-50
PA(14:0_18:1)-H	645.5	281.2	6.16	-80	-50
PA(14:0_18:2)-H	643.4	279.2	6.06	-80	-50
PA(14:0_18:3)-H	641.4	277.2	5.84	-80	-50
PA(14:0_19:0)-H	661.5	297.3	6.85	-80	-50
PA(14:0_20:0)-H	675.5	311.3	7	-80	-50
PA(14:0_20:1)-H	673.5	309.3	6.71	-80	-50
PA(14:0_20:2)-H	671.5	307.3	6.25	-80	-50
PA(14:0_20:3)-H	669.5	305.2	6.02	-80	-50
PA(14:0_20:4)-H	667.4	303.2	5.83	-80	-50
PA(14:0_20:5)-H	665.4	301.2	5.65	-80	-50
PA(14:0_22:4)-H	695.5	331.3	6.63	-80	-50
PA(14:0_22:5)-H	693.5	329.2	5.68	-80	-50
PA(14:0_22:6)-H	691.4	327.2	5.51	-80	-50
PA(15:0_15:0)-H	619.4	241.2	5.9	-80	-50
PA(15:0_16:0)-H	633.5	241.2	6.36	-80	-50
PA(15:0_16:1)-H	631.4	241.2	5.9	-80	-50
PA(15:0_17:0)-H	647.5	241.2	6.86	-80	-50
PA(15:0_18:0)-H	661.5	241.2	7.32	-80	-50
PA(15:0_18:1)-H	659.5	241.2	6.95	-80	-50
PA(15:0_18:2)-H	657.5	241.2	6.57	-80	-50
PA(15:0_18:3)-H	655.4	241.2	6.35	-80	-50
PA(15:0_19:0)-H	675.5	241.2	7.65	-80	-50
PA(15:0_20:0)-H	689.5	241.2	7.82	-80	-50
PA(15:0_20:1)-H	687.5	241.2	7.39	-80	-50
PA(15:0_20:2)-H	685.5	241.2	6.99	-80	-50
PA(15:0_20:3)-H	683.5	241.2	6.54	-80	-50
PA(15:0_20:4)-H	681.5	241.2	6.35	-80	-50
PA(15:0_20:5)-H	679.4	241.2	6.04	-80	-50
PA(15:0_22:4)-H	709.5	241.2	7.08	-80	-50
PA(15:0_22:5)-H	707.5	241.2	7.08	-80	-50
PA(15:0_22:6)-H	705.5	241.2	6.86	-80	-50
PA(16:0_16:0)-H	647.5	255.2	6.65	-80	-50
PA(16:0_16:1)-H	645.5	253.2	6.19	-80	-50
PA(16:0_17:0)-H	661.5	269.2	6.81	-80	-50
PA(16:0_18:0)-H	675.5	283.3	7.66	-80	-50
PA(16:0_18:1)-H	673.5	281.2	6.73	-80	-50
PA(16:0_18:2)-H	671.5	279.2	6.34	-80	-50
PA(16:0_18:3)-H	652.5	277.2	6.15	-80	-50
PA(16:0_19:0)-H	689.5	297.3	7.25	-80	-50
PA(16:0_20:0)-H	703.5	311.3	7.45	-80	-50
PA(16:0_20:1)-H	701.5	309.3	7.25	-80	-50
PA(16:0_20:2)-H	699.5	307.3	6.9	-80	-50
PA(16:0_20:3)-H	697.5	305.2	6.53	-80	-50
PA(16:0_20:4)-H	695.5	303.2	6.29	-80	-50
PA(16:0_20:5)-H	693.5	301.2	5.92	-80	-50
PA(16:0_22:4)-H	723.5	331.3	6.71	-80	-50
PA(16:0_22:5)-H	721.5	329.2	6.34	-80	-50
PA(16:0_22:6)-H	719.5	327.2	6.17	-80	-50
PA(16:1_16:1)-H	643.4	253.2	5.72	-80	-50
PA(16:1_17:0)-H	659.5	269.2	6.16	-80	-50
PA(16:1_18:0)-H	673.5	283.3	6.78	-80	-50
PA(16:1_18:1)-H	671.5	281.2	6.29	-80	-50
PA(16:1_18:2)-H	669.5	279.2	6.35	-80	-50
PA(16:1_18:3)-H	667.4	277.2	6.15	-80	-50
PA(16:1_19:0)-H	687.5	297.3	6.94	-80	-50
PA(16:1_20:0)-H	701.5	311.3	7.05	-80	-50
PA(16:1_20:1)-H	699.5	309.3	6.81	-80	-50
PA(16:1_20:2)-H	697.5	307.3	6.53	-80	-50
PA(16:1_20:3)-H	695.5	305.2	6.12	-80	-50
PA(16:1_20:4)-H	693.5	303.2	5.82	-80	-50
PA(16:1_20:5)-H	691.4	301.2	5.72	-80	-50
PA(16:1_22:4)-H	721.5	331.3	6.24	-80	-50
PA(16:1_22:5)-H	719.5	329.2	5.89	-80	-50
PA(16:1_22:6)-H	717.5	327.2	5.72	-80	-50
PA(17:0_17:0)-H	675.5	269.2	7.15	-80	-50
PA(17:0_18:1)-H	689.5	269.2	7.39	-80	-50
PA(17:0_18:0)-H	687.5	269.2	7.49	-80	-50
PA(17:0_18:2)-H	685.5	269.2	7.1	-80	-50
PA(17:0_18:3)-H	683.5	269.2	6.2	-80	-50
PA(17:0_19:0)-H	703.5	269.2	7.14	-80	-50
PA(17:0_20:0)-H	717.5	269.2	7.35	-80	-50
PA(17:0_20:1)-H	715.5	269.2	7.25	-80	-50
PA(17:0_20:2)-H	713.5	269.2	7.2	-80	-50
PA(17:0_20:3)-H	711.5	269.2	7.13	-80	-50
PA(17:0_20:4)-H	709.5	269.2	7.06	-80	-50
PA(17:0_20:5)-H	707.5	269.2	6.85	-80	-50
PA(17:0_22:4)-H	737.5	269.2	6.85	-80	-50
PA(17:0_22:5)-H	735.5	269.2	6.66	-80	-50
PA(17:0_22:6)-H	733.5	269.2	6.14	-80	-50
PA(18:0_18:0)-H	703.5	283.3	8.04	-80	-50
PA(18:0_18:1)-H	701.5	281.2	7.65	-80	-50
PA(18:0_18:2)-H	699.5	279.2	7.27	-80	-50
PA(18:0_18:3)-H	697.5	277.2	6.77	-80	-50
PA(18:0_19:0)-H	717.5	297.3	7.89	-80	-50
PA(18:0_20:0)-H	731.6	311.3	8.47	-80	-50
PA(18:0_20:1)-H	729.5	309.3	8.08	-80	-50
PA(18:0_20:2)-H	727.5	307.3	7.77	-80	-50
PA(18:0_20:3)-H	725.5	305.2	7.41	-80	-50
PA(18:0_20:4)-H	723.5	303.2	7.22	-80	-50
PA(18:0_20:5)-H	721.5	301.2	6.87	-80	-50
PA(18:0_22:4)-H	751.5	331.3	7.58	-80	-50
PA(18:0_22:5)-H	749.5	329.2	7.26	-80	-50
PA(18:0_22:6)-H	747.5	327.2	7.1	-80	-50
PA(18:1_18:1)-H	699.5	281.2	7.27	-80	-50
PA(18:1_18:2)-H	697.5	279.2	6.88	-80	-50
PA(18:1_18:3)-H	695.5	277.2	6.47	-80	-50
PA(18:1_19:0)-H	715.5	297.3	7.51	-80	-50
PA(18:1_20:0)-H	729.5	311.3	7.77	-80	-50
PA(18:1_20:1)-H	727.5	309.3	7.29	-80	-50
PA(18:1_20:2)-H	725.5	307.3	7.02	-80	-50
PA(18:1_20:3)-H	723.5	305.2	7.04	-80	-50
PA(18:1_20:4)-H	721.5	303.2	6.89	-80	-50
PA(18:1_20:5)-H	719.5	301.2	6.42	-80	-50
PA(18:1_22:4)-H	749.5	331.3	7.08	-80	-50
PA(18:1_22:5)-H	747.5	329.2	6.89	-80	-50
PA(18:1_22:6)-H	745.5	327.2	6.79	-80	-50
PA(18:2_18:2)-H	695.5	279.2	6.49	-80	-50
PA(18:2_18:3)-H	693.5	277.2	6.1	-80	-50
PA(18:2_19:0)-H	713.5	297.3	7.64	-80	-50
PA(18:2_20:0)-H	727.5	311.3	7.89	-80	-50
PA(18:2_20:1)-H	725.5	309.3	7.44	-80	-50
PA(18:2_20:2)-H	723.5	307.3	7.02	-80	-50
PA(18:2_20:3)-H	721.5	305.2	6.71	-80	-50
PA(18:2_20:4)-H	719.5	303.2	6.44	-80	-50
PA(18:2_20:5)-H	717.5	301.2	6.1	-80	-50
PA(18:2_22:4)-H	747.5	331.3	6.9	-80	-50
PA(18:2_22:5)-H	745.5	329.2	6.63	-80	-50
PA(18:2_22:6)-H	743.5	327.2	6.45	-80	-50
PA(18:3_18:3)-H	691.4	277.2	6.85	-80	-50
PA(18:3_19:0)-H	711.5	297.3	7.15	-80	-50
PA(18:3_20:0)-H	725.5	311.3	7.35	-80	-50
PA(18:3_20:1)-H	723.5	309.3	7.15	-80	-50
PA(18:3_20:2)-H	721.5	307.3	6.85	-80	-50
PA(18:3_20:3)-H	719.5	305.2	6.65	-80	-50
PA(18:3_20:4)-H	717.5	303.2	6.43	-80	-50
PA(18:3_20:5)-H	715.4	301.2	6.25	-80	-50
PA(18:3_22:4)-H	745.5	331.3	6.15	-80	-50
PA(18:3_22:5)-H	743.5	329.2	5.85	-80	-50
PA(18:3_22:6)-H	741.5	327.2	5.65	-80	-50
PA(19:0_19:0)-H	731.6	297.3	7.62	-80	-50
PA(19:0_20:0)-H	745.6	297.3	6.65	-80	-50
PA(19:0_20:1)-H	743.6	297.3	6.45	-80	-50
PA(19:0_20:2)-H	741.5	297.3	6.25	-80	-50
PA(19:0_20:3)-H	739.5	297.3	6.05	-80	-50
PA(19:0_20:4)-H	737.5	297.3	5.85	-80	-50
PA(19:0_20:5)-H	735.5	297.3	5.65	-80	-50
PA(19:0_22:4)-H	765.5	297.3	6.81	-80	-50
PA(19:0_22:5)-H	763.5	297.3	6.7	-80	-50
PA(19:0_22:6)-H	761.5	297.3	6.67	-80	-50
PA(20:0_20:0)-H	759.6	311.3	8.84	-80	-50
PA(20:0_20:1)-H	757.6	309.3	8.49	-80	-50
PA(20:0_20:2)-H	755.6	307.3	8.24	-80	-50
PA(20:0_20:3)-H	753.5	305.2	7.92	-80	-50
PA(20:0_20:4)-H	751.5	303.2	7.75	-80	-50
PA(20:0_20:5)-H	749.5	301.2	7.28	-80	-50
PA(20:0_22:4)-H	777.5	331.3	7.85	-80	-50
PA(20:0_22:5)-H	777.5	329.2	7.66	-80	-50
PA(20:0_22:6)-H	775.5	327.2	7.24	-80	-50
PA(20:1_20:1)-H	755.6	309.3	8.13	-80	-50
PA(20:1_20:2)-H	753.5	307.3	7.83	-80	-50
PA(20:1_20:3)-H	751.5	305.2	7.5	-80	-50
PA(20:1_20:4)-H	749.5	303.2	7.28	-80	-50
PA(20:1_20:5)-H	747.5	301.2	6.91	-80	-50
PA(20:1_22:4)-H	777.5	331.3	7.66	-80	-50
PA(20:1_22:5)-H	775.5	329.2	7.31	-80	-50
PA(20:1_22:6)-H	773.5	327.2	7.17	-80	-50
PA(20:2_20:2)-H	751.5	307.3	7.47	-80	-50
PA(20:2_20:3)-H	749.5	305.2	6.97	-80	-50
PA(20:2_20:4)-H	747.5	303.2	6.89	-80	-50
PA(20:2_20:5)-H	745.5	301.2	6.52	-80	-50
PA(20:2_22:4)-H	803.6	331.3	7.75	-80	-50
PA(20:2_22:5)-H	801.5	329.2	7.41	-80	-50
PA(20:2_22:6)-H	799.5	327.2	7.28	-80	-50
PA(20:3_20:3)-H	747.5	305.2	6.73	-80	-50
PA(20:3_20:4)-H	745.5	303.2	6.53	-80	-50
PA(20:3_20:5)-H	743.5	301.2	6	-80	-50
PA(20:3_22:4)-H	773.5	331.3	6.93	-80	-50
PA(20:3_22:5)-H	771.5	329.2	6.9	-80	-50
PA(20:3_22:6)-H	769.5	327.2	6.89	-80	-50
PA(20:4_20:4)-H	743.5	303.2	6.85	-80	-50
PA(20:4_20:5)-H	741.5	301.2	6.65	-80	-50
PA(20:4_22:4)-H	771.5	331.3	7.05	-80	-50
PA(20:4_22:5)-H	769.5	329.2	6.85	-80	-50
PA(20:4_22:6)-H	767.5	327.2	6.65	-80	-50
PA(20:5_20:5)-H	739.4	301.2	6.91	-80	-50
PA(20:5_22:4)-H	769.5	331.3	7.3	-80	-50
PA(20:5_22:5)-H	767.5	329.2	6.76	-80	-50
PA(20:5_22:6)-H	765.5	327.2	6.63	-80	-50
PA(22:4_22:4)-H	799.5	331.3	6.4	-80	-50
PA(22:4_22:5)-H	797.5	329.2	6.68	-80	-50
PA(22:4_22:6)-H	795.5	327.2	5.71	-80	-50
PA(22:5_22:5)-H	795.5	329.2	7.11	-80	-50
PA(22:5_22:6)-H	793.5	327.2	7.36	-80	-50
PA(22:6_22:6)-H	791.5	327.2	7.36	-80	-50
FFA(12:0)	199.2	199.2	1.47	-80	-10
FFA(14:0)	227.2	227.2	2.17	-80	-10
FFA(14:1)	225.2	225.2	1.69	-80	-10
FFA(15:0)	241.2	241.2	2.6	-80	-10
FFA(16:0)	255.2	255.2	3.07	-80	-10
FFA(16:1)	253.2	253.2	2.37	-80	-10
FFA(17:0)	269.2	269.2	3.56	-80	-10
FFA(18:0)	283.3	283.3	4.06	-80	-10
FFA(18:1)	281.2	281.2	3.29	-80	-10
FFA(18:2)	279.2	279.2	2.65	-80	-10
FFA(18:3)	277.2	277.2	2.19	-80	-10
FFA(18:4)	275.2	275.2	1.76	-80	-10
FFA(20:0)	311.3	311.3	5.04	-80	-10
FFA(20:1)	309.3	309.3	4.21	-80	-10
FFA(20:2)	307.3	307.3	3.52	-80	-10
FFA(20:3)	305.2	305.2	2.97	-80	-10
FFA(20:4)	303.2	303.2	2.54	-80	-10
FFA(20:5)	301.2	301.2	2.05	-80	-10
FFA(22:0)	339.3	339.3	5.94	-80	-10
FFA(22:1)	337.3	337.3	5.12	-80	-10
FFA(22:2)	335.3	335.3	4.47	-80	-10
FFA(22:4)	331.3	331.3	3.3	-80	-10
FFA(22:5)	329.2	329.2	2.79	-80	-10
FFA(22:6)	327.2	327.2	2.31	-80	-10
FFA(24:0)	367.4	367.4	6.72	-80	-10
FFA(24:1)	365.3	365.3	5.96	-80	-10
dFFA(16:0)	264.2	264.2	2.81	-80	-10
dFFA(17:1)	267.2	267.2	2.81	-80	-10
