# Supplementary material for: Time-Course Lipidomics of Ornithine-Induced Severe Acute Pancreatitis Model Reveals the Free Fatty Acids Centered Lipids Dysregulation Characteristics
Source: Metabolites. 2023 Sep 5;13(9):993. doi: 10.3390/metabo13090993 (PMC10647642; doi:10.3390/metabo13090993)
Supplement: Supplementary file 1 [file metabolites-13-00993-s001.zip › Table S4-lipids in pancreas.xlsx]

## Sheet: NEG
Sample Name	LPC(14:0)+AcO	LPC(15:0)+AcO	LPC(16:0)+AcO	LPC(16:1)+AcO	LPC(17:0)+AcO	LPC(18:0)+AcO	LPC(18:1)+AcO	LPC(18:2)+AcO	LPC(18:3)+AcO	LPC(19:0)+AcO	LPC(20:0)+AcO	LPC(20:1)+AcO	LPC(20:2)+AcO	LPC(20:3)+AcO	LPC(20:4)+AcO	LPC(20:5)+AcO	LPC(22:4)+AcO	LPC(22:5)+AcO	LPC(22:6)+AcO	PC(14:0_14:0)+AcO	PC(14:0_15:0)+AcO	PC(14:0_16:0)+AcO	PC(14:0_16:1)+AcO	PC(14:0_18:0)+AcO	PC(14:0_18:1)+AcO	PC(14:0_18:2)+AcO	PC(14:0_18:3)+AcO	PC(14:0_20:0)+AcO	PC(14:0_20:1)+AcO	PC(14:0_20:3)+AcO	PC(14:0_20:4)+AcO	PC(14:0_20:5)+AcO	PC(15:0_16:0)+AcO	PC(15:0_18:0)+AcO	PC(15:0_18:1)+AcO	PC(15:0_18:2)+AcO	PC(15:0_20:4)+AcO	PC(16:0_16:0)+AcO	PC(16:0_16:1)+AcO	PC(16:0_17:0)+AcO	PC(16:0_18:0)+AcO	PC(16:0_18:1)+AcO	PC(16:0_18:2)+AcO	PC(16:0_18:3)+AcO	PC(16:0_20:1)+AcO	PC(16:0_20:2)+AcO	PC(16:0_20:3)+AcO	PC(16:0_20:4)+AcO	PC(16:0_20:5)+AcO
1*1	6.80194	5.55183	4.91254	7.31691	4.68859	3.48439	6.08151	5.57073	11.2212	4.28879	6.53738	8.64276	6.21089	8.94766	4.97997	6.0189	2.77825	3.28193	4.45219	5.09957	3.77025	4.18372	4.11047	5.01095	2.21857	2.84855	6.71094	8.33131	3.07149	4.20509	3.3083	4.16476	3.39261	3.37301	3.57591	3.53514	3.63968	2.67696	3.2017	2.69565	3.53513	3.38476	3.58438	6.33905	5.21542	3.19301	4.26304	3.11916	4.2023
1*2	6.46118	3.42401	3.46861	4.89308	2.48008	2.24442	3.36711	1.71437	3.49905	2.68323	3.80908	5.57581	4.10211	4.61905	1.9637	3.06472	1.72943	1.69256	1.21743	14.2239	7.78057	7.63479	9.93341	6.01707	5.10299	6.43146	10.3821	8.71222	6.62689	11.3023	7.74881	12.4202	3.20238	3.46113	3.73186	3.30385	4.97965	3.05444	6.01198	3.22745	2.84946	3.92495	4.04502	7.7141	6.48943	4.57791	9.20694	4.76669	7.46516
1*3	8.35719	5.63643	4.60474	4.68538	3.12221	2.67805	3.68334	1.80597	2.78347	2.14054	1.79867	2.85804	2.32067	1.95024	1.39151	1.82592	0.721756	0.969292	1.22365	8.90251	6.02178	4.97252	6.62454	5.1651	4.92768	6.17232	10.6588	2.77576	4.5784	5.11437	6.40317	11.6143	2.93396	3.40247	3.46349	4.25889	4.32141	2.85123	4.46817	3.07085	2.9659	3.8069	4.93249	10.0349	2.95518	2.83927	4.84902	4.46834	6.90333
1*4	3.36536	2.17285	2.24122	2.16365	1.69821	1.4585	2.29508	2.51367	3.36868	1.46296	2.52055	3.06532	2.79726	3.59623	2.65198	3.04506	1.4576	1.81298	2.02521	7.67684	5.40016	4.47501	3.53125	3.80876	4.42463	4.36354	6.40639	8.80115	7.13418	5.59828	5.1864	5.73008	2.63434	2.46405	2.73955	3.5102	4.04689	2.15548	2.85363	2.29508	2.36666	2.7248	3.55683	5.24533	5.65837	4.67186	4.5288	4.0216	5.00007
1*5	3.26335	3.08431	2.73402	2.6279	2.09998	1.87749	2.59108	2.82073	4.4038	1.96923	2.67696	2.88808	2.54039	3.44629	2.2709	2.73323	1.41963	1.45665	2.00222	5.80478	5.86231	4.57401	5.86228	5.55684	5.9628	6.74711	10.736	7.81846	6.84908	6.47603	5.24557	7.51393	3.3309	3.38602	3.54954	5.34469	4.81298	2.64813	3.09566	2.9727	2.84271	3.43216	5.13835	8.86616	6.31526	5.08512	4.69008	3.98599	5.80874
1*6	3.24181	2.56953	2.627	2.31778	1.93678	1.89877	2.41951	2.67628	3.22667	1.6015	2.37541	2.62896	2.41682	3.58008	2.9453	2.27857	2.05436	1.98386	2.28562	6.88384	8.09207	5.22495	5.46337	4.31676	5.9685	6.29273	6.89105	6.20338	6.99533	6.47926	7.0644	5.00434	3.60597	3.89382	3.43762	5.49598	5.32949	3.48414	3.49806	3.41604	3.179	3.51264	4.38708	5.90655	5.34609	4.51373	5.03052	5.05549	4.86404
2*13	3.17789	2.23151	2.33324	4.23741	1.57968	1.65621	3.82104	7.63649	8.48547	1.83956	2.28659	2.25695	2.52799	6.18676	9.70259	16.1116	5.55854	8.11313	6.53894	3.69214	3.00071	3.3479	3.28272	3.75879	3.93729	4.34299	2.57746	3.0798	4.37406	2.37553	3.84174	5.39219	3.24307	2.83495	2.93126	3.65188	3.80296	2.54449	2.95595	2.49297	2.0293	3.03104	3.54572	3.17111	2.63674	2.73896	2.52628	3.46019	5.15546
2*14	3.4605	3.64627	3.58981	4.61672	3.27197	2.78394	4.94959	4.04746	3.55965	2.85785	1.38797	2.92247	2.42316	2.42081	3.45298	4.41786	2.42481	3.8855	3.10534	2.30856	2.58768	2.36493	2.72942	3.56742	2.57078	2.64261	2.41162	0.948547	0.966602	0.863695	2.70575	4.02278	2.43014	2.64941	3.87042	3.19461	3.16231	1.88953	2.7025	2.01708	2.07801	3.55236	3.23454	2.21787	2.01663	1.70701	1.95095	3.27319	4.11471
2*15	1.47295	2.16463	1.73486	1.97545	1.67655	1.15426	1.69228	2.16781	1.71773	1.73795	1.18462	1.0547	1.08585	1.44107	2.20151	3.98329	0.851673	2.11912	1.69991	0.911222	1.64963	1.27337	1.47639	0.72945	2.31587	2.18407	0.969685	0.83696	1.68494	0.976489	1.80872	2.46669	2.36466	2.13121	3.04267	2.70346	2.74896	1.51939	1.91092	2.5017	1.37946	2.11756	2.32025	1.56016	1.27926	1.41298	1.50464	2.04086	3.43855
2*16	1.14802	1.48879	1.58969	1.1904	1.48757	1.41433	1.10338	1.51359	1.03817	1.28619	0.634799	0.750086	0.870072	1.35888	1.89893	2.61874	1.92732	2.13358	1.69203	2.08831	4.0369	2.65286	3.69153	2.74675	5.71639	4.06149	2.10131	1.01603	2.96145	2.22244	4.30288	5.48709	3.31339	3.80213	3.85421	4.75052	6.40668	2.12001	2.99963	3.63449	3.13155	4.38906	3.7126	2.39789	2.56993	2.49883	2.69065	4.53029	6.5138
2*17	2.29454	2.11676	2.24731	2.15196	1.72779	1.72311	2.30711	3.40115	2.07768	1.60382	1.86837	2.00179	2.26449	2.66455	3.36135	4.80782	1.72118	2.89209	2.64159	2.48081	2.67653	2.22889	2.26205	2.57434	2.41865	3.78702	2.00335	1.77051	3.10765	3.03445	3.38119	4.77588	1.97929	2.4232	1.88221	3.41473	3.3169	1.792	1.94916	1.7113	1.66057	2.60869	3.37188	1.71877	2.60815	2.78122	2.52292	3.0372	4.86088
2*18	4.08333	4.65115	4.5354	4.46021	4.11859	3.65331	4.2612	7.33898	4.79687	3.72171	3.10129	4.65357	4.13183	3.68499	7.75025	8.28283	6.32856	6.56401	5.34579	0.658486	1.31218	2.17189	2.02242	1.99843	2.205	2.74458	1.12554	1.47803	2.9959	0.952938	2.4913	1.45638	2.49888	2.78309	2.54295	3.14216	3.34325	2.90024	1.69802	3.25742	3.58578	2.97669	3.89082	1.79303	2.82484	2.31458	1.60825	3.6988	3.91118
2*19	2.88745	2.08091	2.41947	3.61644	1.91033	1.85316	2.76713	3.00955	2.83244	1.7464	2.17338	2.35105	2.31403	2.1739	2.89426	2.11547	2.68777	2.74298	2.51883	3.26254	2.68839	2.40062	3.34529	3.15319	2.21024	2.67195	1.44071	1.74236	4.63861	1.56379	2.54524	1.47409	1.92736	2.57433	2.93365	2.23066	2.67908	1.98724	2.86174	2.09224	1.7703	2.88716	2.30367	1.96149	2.13973	3.19242	1.77703	2.55126	2.08605
2*20	1.80939	1.76273	2.15723	2.0827	2.03225	2.22599	2.5407	2.95729	1.95975	1.97063	1.81624	1.8775	2.10665	2.50044	2.79873	3.2388	3.09033	3.22174	2.32633	2.8027	2.6972	3.511	4.33138	2.95762	4.22192	5.20878	2.69903	2.2807	3.61307	3.31663	4.35494	3.89168	2.97084	3.85298	4.01875	4.06391	3.81431	2.86419	3.20656	3.44646	2.87222	3.79231	4.56423	2.54984	3.59324	3.06759	3.1921	4.07649	4.76399
3*25	2.57747	2.24174	2.62697	2.11919	2.44486	2.60811	1.97131	1.99868	1.16255	2.14455	1.57191	1.51058	1.64755	1.25883	1.65428	1.20401	1.97146	2.31402	2.4716	1.37511	2.12866	2.45218	1.18083	2.12032	1.30079	1.62143	0.684846	1.12604	1.03867	0.928703	1.56038	0.431377	2.23966	2.05285	2.4039	1.57552	1.82281	2.26655	2.00573	2.13094	2.11446	2.90584	1.97639	1.01512	1.08	1.44601	1.11606	1.93599	1.60206
3*26	1.89138	2.02061	2.41021	3.50217	2.10014	1.99116	3.79185	5.23989	3.66136	2.04163	1.42102	1.20214	1.64536	4.01629	7.5898	7.6229	5.72221	7.48546	8.26878	0.987782	0.521847	1.55851	1.42785	1.70414	1.75356	1.302	0.691578	0.741366	0.216808	0.566434	1.45407	0.718389	2.10667	1.90419	1.6909	1.56598	1.85217	2.48804	2.2381	1.69844	2.51793	3.02112	2.21564	1.14285	1.73353	1.6556	1.29246	2.54886	2.30247
3*27	2.15817	2.78277	2.951	1.75768	3.29116	3.51549	2.70237	1.95086	1.45741	3.14333	2.6479	2.41175	2.31841	1.33903	1.56955	1.22065	2.16707	2.39425	2.54819	0.417766	0.864541	1.22863	0.478659	1.24502	0.418257	0.722883	0.249852	0.88832	0.218225	0.461739	0.643545	0.397997	1.54892	1.36102	1.10878	1.10195	0.818553	1.82748	1.06243	1.27205	1.59912	1.2898	1.1021	0.780464	0.815746	1.15371	0.724904	0.967477	0.859936
3*28	2.26204	2.67161	2.74815	2.06545	3.10856	2.96765	2.20643	1.96706	2.31808	3.64604	2.60235	2.4489	1.90002	1.55166	2.00541	1.62931	2.42589	2.97794	3.92254	0.689593	1.61104	1.99219	1.39284	1.43965	1.19022	1.14475	1.05901	1.26174	0.660668	1.1787	1.16559	0.901434	1.85922	1.29943	1.56967	1.24514	1.17502	2.42399	1.84089	1.82908	1.98136	1.8646	1.50266	1.43588	1.40026	1.7246	1.22204	1.66245	1.38634
3*29	1.37543	1.53461	1.87662	1.34835	1.68441	2.22703	1.27841	2.11123	0.999017	1.69515	1.67166	1.30155	1.35455	1.31725	1.8634	1.32309	2.23426	2.75517	2.41045	0.564351	0.689645	1.43341	0.481984	1.18085	0.936787	0.939445	0.292261	1.04631	0.91157	0.358678	0.740891	0.154965	1.45388	1.1655	1.39783	1.28125	1.027	1.65609	1.20453	1.5454	1.37924	1.55583	1.41073	0.575539	0.987955	1.38089	0.772298	1.23216	0.856805
3*30	2.49115	2.67842	2.43647	2.14516	2.60341	2.26807	2.18609	2.98592	1.9784	2.70492	2.2641	2.31942	2.76812	1.63934	2.54694	1.67249	2.87034	2.4556	2.46546	1.73278	2.19686	2.81454	1.8157	2.75011	2.49476	2.33445	1.10343	1.79882	2.21293	0.959623	2.11022	0.664676	3.14486	2.9254	3.35153	3.53897	2.62935	2.99446	2.20716	3.17161	2.86897	2.77656	2.85466	1.50053	2.59341	2.59513	1.51513	2.45897	1.49078
4*34	1.61445	2.2601	2.12413	1.90237	2.63875	2.65835	2.03377	2.14009	0.881379	3.38142	2.37913	1.68394	1.84464	1.06647	1.54563	0.851286	1.87345	1.92448	2.31457	0.412629	1.34245	1.51116	0.77366	1.76418	1.07893	1.24886	0.219487	1.13665	0.825061	0.471238	0.725791	0.137627	2.57223	2.33983	2.12202	1.75526	1.3922	2.20067	1.55491	2.54822	2.29216	1.61357	1.86902	0.58933	1.12207	1.37135	0.920311	1.13244	0.650514
4*35	1.38187	1.48938	1.74994	2.1822	1.59859	1.75165	2.10808	2.69307	1.40137	1.75133	1.99008	1.44824	1.64742	1.97789	2.50133	1.57209	3.36194	3.39776	4.05773	0.321539	0.211565	1.75464	0.648805	1.84456	1.16829	1.22311	0.22142	1.7329	1.05341	0.734011	0.91434	0.176614	1.57394	1.63723	1.39335	1.4075	1.29849	2.50022	1.69279	2.136	2.4496	1.75413	1.93596	0.673252	2.15856	2.25138	1.05709	1.42282	0.848037
4*36	2.48443	3.43392	3.17531	2.11172	3.42057	3.0906	3.00924	2.42737	1.67116	3.22676	3.00227	3.34497	3.72463	1.66613	2.43939	1.0907	3.544	3.01447	2.56437	0.739251	2.34664	2.58496	1.39704	2.8632	1.73752	2.35232	1.35783	3.04994	1.96698	2.04245	2.43839	1.00659	2.83948	3.54848	2.1798	3.24528	2.98795	2.71733	2.02036	2.97882	3.6106	2.79806	2.64407	1.82606	3.44131	3.17751	1.78419	3.33144	1.61986
4*37	1.85728	2.00308	2.59942	1.59813	2.65065	2.66479	2.2885	2.13557	1.39993	2.78287	3.11768	2.53725	3.14459	1.84105	2.78098	1.62099	4.09654	3.65139	3.45119	1.52999	1.45301	2.10344	1.06217	2.04374	0.831281	1.01409	0.393752	1.00854	0.771288	0.879808	1.17776	0.480291	1.78565	1.41589	1.15823	1.19366	1.23893	2.35041	1.2304	1.33033	2.22129	1.43978	1.25651	0.685732	1.41606	1.66141	0.97297	1.64872	0.885719
4*38	1.61908	1.71247	2.27906	2.10195	2.00257	2.58832	2.50241	1.95383	0.917326	1.97479	1.85261	1.50794	1.74033	1.2618	2.0357	1.1048	3.31171	3.1683	2.72287	0.274155	0.684937	0.749183	0.501341	1.27538	0.490488	0.49441	0.12208	0.664874	0.340424	0.291775	0.590837	0.446328	1.24033	1.25031	1.2674	0.584209	0.734495	1.92617	1.21981	1.26914	1.63664	1.30874	0.882524	0.347439	0.941714	1.05953	0.559383	0.988916	0.551576
4*39	1.89337	2.72465	2.33106	2.48414	2.79964	1.95348	2.13652	2.48624	1.14689	3.32297	2.63186	1.47304	1.98632	1.10216	1.93517	1.05641	2.4339	2.47001	2.295	0.472057	1.69579	1.92928	1.27818	1.33061	1.52498	1.25764	0.266302	2.69312	1.56458	0.417208	1.00702	0.188488	2.25854	2.35607	1.64609	1.35117	1.26316	3.11205	2.00737	2.91412	2.79746	2.42386	1.62224	0.747845	2.20632	2.09298	1.01281	1.63681	0.830188
5*43	5.24016	6.94736	5.46733	4.54466	6.64495	5.42617	4.80694	3.33769	3.77558	5.52369	6.20484	5.5119	5.76496	3.37929	3.5038	2.12109	4.2906	3.84855	3.96759	1.67134	4.06665	2.07202	2.43177	1.87055	1.66931	2.40961	2.52165	2.36935	1.26187	1.73711	2.59495	1.87364	2.64598	3.2038	2.53615	3.39009	3.19107	2.17222	2.22387	3.07632	2.37444	2.12129	2.55177	3.37513	2.73955	2.70755	2.4314	3.05364	2.53684
5*44	1.2321	1.36778	1.56767	1.52954	1.56663	1.96898	1.79547	1.81592	1.12973	1.51106	1.40688	1.17052	1.61116	1.06239	1.39899	1.50528	1.87178	1.29178	1.21091	0.469781	0.146759	1.02487	0.474311	1.10704	0.893816	0.544395	0.171553	0.229501	0.135336	0.564456	0.559354	0.174394	1.25828	1.33422	0.697648	0.696757	0.67007	1.53017	1.22822	1.46841	1.49226	0.991243	0.862064	0.298758	0.614876	0.907002	0.692382	0.919696	0.413778
5*45	0.207448	0.299582	0.566783	0.1943	0.972336	1.73921	0.506052	0.127811	0.0629628	1.30864	1.01132	0.616859	0.896125	0.158515	0.0908564	0.00500489	0.739457	0.14681	0.299694	0.0536962	0.796712	1.05733	0.382232	0.851094	0.536562	0.277634	0.0298348	0.156635	0.301145	0.27527	0.347098	0.0446914	1.0697	1.04646	0.682178	0.343882	0.40019	1.58871	0.898579	1.06811	1.50536	0.789205	0.480659	0.146474	0.476652	0.861053	0.415388	0.715148	0.109515
5*46	1.8908	2.90009	3.09739	1.46643	3.61039	3.64313	1.76728	1.26624	0.808871	3.43486	3.88057	2.29747	3.59959	1.51683	1.0886	0.499891	2.38297	1.66199	1.68079	1.03835	0.783448	1.58941	0.855994	1.45763	1.343	1.18834	0.446541	1.60368	0.682402	1.23714	1.36791	0.423332	1.92372	2.04111	1.2714	1.59533	1.87838	2.00221	1.43772	1.63327	2.31824	1.82816	1.7695	0.997918	1.36507	2.16218	1.90045	2.14471	1.01075
5*47	1.64717	3.0577	2.93798	1.26761	4.2092	3.71503	2.26623	0.970401	0.497267	3.81932	3.4724	2.98723	3.51161	1.16059	0.784224	0.325004	2.23267	1.27599	1.06864	0.624279	1.15278	1.29039	0.539765	1.26059	0.889555	0.97432	0.465488	0.483323	0.649695	0.719839	1.2464	0.478296	2.3131	3.03822	2.48131	1.6816	1.87099	2.01003	1.596	2.29286	2.38268	1.90986	1.44471	0.661459	1.06888	1.63407	1.5088	1.56386	0.798342
5*48	1.62502	1.64631	1.91582	1.63204	2.25653	2.08039	1.54674	1.24211	0.612035	2.66511	2.8993	1.79636	2.08555	1.08253	1.08263	0.55585	1.91293	1.22384	1.36384	1.44607	1.6578	1.74913	1.42206	1.04491	1.683	1.23894	0.372496	1.13083	1.54351	1.21425	1.19683	0.368881	1.40442	1.71225	1.68377	1.07423	1.3602	1.95113	1.88928	2.14367	2.16705	1.6182	1.35701	0.652155	1.44372	1.61801	1.21669	1.60787	0.792015
6*52	0.104974	0.260411	0.28427	0.145552	0.474735	0.93835	0.25859	0.082844	0.0270278	0.64854	0.436125	0.18439	0.324187	0.0772033	0.0815199	0.00383881	0.504969	0.135092	0.111775	0.189668	0.249039	0.684591	0.454483	0.430217	0.870607	0.254027	0.0772751	0.297541	0.178393	0.48824	0.467677	0.0359931	1.5033	0.882793	0.92907	0.37868	0.38218	1.40025	1.27003	1.28664	1.23414	0.720372	0.377675	0.163326	0.388169	0.711722	0.427156	0.596637	0.0586258
6*53	0.116907	0.273008	0.393922	0.211067	0.692025	1.49323	0.403452	0.0927698	0.0336183	0.983122	0.757768	0.391731	0.593402	0.129982	0.0750635	0.0104718	0.607766	0.153735	0.121487	0.234988	0.774993	1.26091	0.943596	1.05583	1.81384	0.425774	0.108521	0.684887	0.647449	1.20642	0.736724	0.383334	2.52919	1.82576	1.61113	0.740252	0.560786	2.94216	2.22483	1.97335	2.24554	1.4573	0.58251	0.253548	0.965455	1.5231	0.742326	0.838541	0.100465
6*54	0.222075	0.408229	0.527086	0.375133	0.837467	1.39202	0.54409	0.162153	0.067108	0.917048	0.77114	0.455803	0.738154	0.244927	0.136825	0.0148201	0.895103	0.216551	0.309611	0.369414	0.70445	1.13869	0.771714	1.21715	1.16177	0.4362	0.127777	0.251114	0.384009	0.535119	0.59549	0.0609146	1.73749	1.15152	1.22503	0.629915	0.572568	1.6535	1.9821	1.65918	1.52351	0.935496	0.588184	0.264635	0.411254	0.922387	0.675926	0.743583	0.135944
6*55	0.464051	0.752438	1.15393	0.654165	1.52567	2.33062	0.949367	0.538925	0.258811	2.04546	1.75142	0.829526	1.06303	0.652396	0.421189	0.0295341	1.30057	0.556193	0.734986	0.125507	1.03771	1.36544	1.13781	1.08095	2.99257	0.952939	0.302214	0.738091	0.645975	1.63962	1.1036	0.321929	1.92384	1.94971	1.43453	1.03152	0.80897	2.96307	2.32903	2.55813	3.00592	1.77261	1.21308	0.679267	0.962517	1.14309	1.47846	1.56871	0.386838
6*56	0.365151	0.805718	0.954645	0.608318	1.75064	2.32498	1.16238	0.451751	0.24782	2.03855	1.52236	0.742746	1.28897	0.768781	0.428782	0.152463	1.93561	0.507363	0.453246	0.139268	0.945189	0.898819	0.93629	1.15048	1.94854	0.674948	0.46228	0.898314	0.369766	1.34267	0.850596	0.0683292	2.14445	2.29162	2.38387	1.37252	1.11021	2.07028	1.88175	2.32766	3.06041	1.48494	1.22144	0.816562	0.801372	1.37248	1.71785	1.42546	0.412474
6*57	3.93164	3.60099	3.71573	4.79836	3.26001	3.42738	4.42478	2.79877	4.65906	3.04415	4.73665	5.94733	4.51106	4.67228	2.0646	1.92014	2.30098	1.9166	1.77586	0.947964	1.36632	1.72933	3.01803	2.93488	1.8519	3.22662	4.57302	3.53853	1.9536	3.28883	2.48076	2.84272	1.97851	3.19764	3.65254	2.85839	2.4611	1.88822	3.14988	2.46884	2.00743	2.80218	3.11409	5.06184	2.9939	2.87007	4.2175	2.46641	2.54585
7*61	1.5045	1.32447	1.17645	1.68132	1.14627	1.17419	0.97399	0.999638	1.3837	1.65775	1.77175	1.46045	1.41458	4.28198	0.939185	1.04985	0.933872	0.788942	0.960787	6.55048	3.91952	3.0474	5.62854	1.9206	3.00594	2.70927	3.94139	5.88395	5.43498	9.20883	2.59726	3.86398	2.10132	1.63973	2.60404	2.13751	1.94967	1.7478	4.40663	2.18376	0.854152	2.3191	2.2432	3.13305	4.16811	3.78416	7.20334	1.77454	2.231
7*62	0.0532297	0.296225	0.250113	0.106895	0.528705	0.663599	0.21174	0.0960393	0.0384881	0.46475	0.362687	0.129075	0.226179	0.156269	0.071698	0.00241476	0.276896	0.114473	0.145176	0.0589833	0.0601722	0.323835	0.200577	0.356031	0.538638	0.187101	0.0203654	0.155684	0.113191	0.343642	0.307685	0.04443	1.28263	0.746443	0.99374	0.627027	0.32461	1.1849	0.747617	1.52223	0.798417	0.516139	0.474989	0.180008	0.260127	0.568094	0.510167	0.348605	0.0787062
7*63	0.111297	0.477051	0.650332	0.174029	1.30042	1.99698	0.522434	0.14394	0.0636515	1.60092	1.47614	0.876848	1.09736	0.348159	0.0752766	0.00644899	0.448628	0.132832	0.186978	0.124693	0.651207	0.582162	0.412418	0.979304	1.36469	0.529921	0.191116	0.61233	0.326025	1.11131	0.55873	0.0616019	2.12336	1.4714	1.46239	1.36831	0.719287	2.5691	1.32406	1.9659	2.69771	1.20109	1.12993	0.557633	1.05356	1.93925	1.24415	0.765403	0.255455
7*64	0.0982082	0.586075	0.493929	0.151979	1.42749	1.78173	0.419006	0.144246	0.0608957	1.67574	1.38572	0.47421	0.781451	0.275396	0.093615	0.00251696	0.599458	0.127444	0.117642	0.299265	0.429794	0.438481	0.383454	0.628466	1.26486	0.35794	0.10502	0.543705	0.206167	0.784769	0.571701	0.100862	2.39998	1.39411	1.58174	1.15561	0.744755	1.77088	1.24551	2.39872	1.45386	0.849953	0.777507	0.419389	0.573173	1.22988	1.02919	0.674038	0.133061
7*65	3.41084	3.12589	2.77161	4.31582	2.38692	2.32241	3.45167	1.95687	3.25127	2.3543	3.12474	5.42413	4.55489	6.24766	1.83378	1.93392	2.34948	1.79233	1.61007	4.98561	4.7645	3.17472	5.0566	2.77867	2.68551	3.08827	5.80948	4.21043	3.49605	7.25035	3.3756	3.70179	2.3532	2.07356	3.22004	3.31771	2.96776	2.24094	4.10502	2.05025	2.45379	2.88529	2.88063	4.70694	4.56006	3.74722	6.37181	2.60822	3.12941
7*66	2.34341	1.73556	1.57153	2.48829	1.23574	1.19095	1.89477	4.50799	9.05662	1.58088	1.70431	1.98661	2.10354	5.17594	5.09782	3.34995	3.65228	3.23123	5.31307	4.35738	3.16961	3.4439	3.84478	4.9524	4.35875	4.36918	6.49812	3.26826	10.2922	3.28049	4.1244	4.03177	2.85639	2.71164	2.68585	3.15406	3.38253	3.36351	2.3617	2.2671	2.71023	2.90459	3.07071	4.83562	3.60832	4.13411	2.92615	3.13232	1.89841
[truncated: 434 more columns]

## Sheet: NEG-Abundance Proportion
Sample Name	LPC比例	PC比例	LPE比例	PE比例	PE-O比例	LPG比例	PG比例	LPI比例	PI比例	PS比例	CL比例	PA比例	FFA比例
0h	0.0342662	0.179549	0.042003	0.195789	0.0344451	0.00202799	0.0815123	0.0220201	0.158208	0.123132	0.0302073	0.0760487	0.0207909
6h	0.0499273	0.19823	0.050505	0.151965	0.0301464	0.0066873	0.0991479	0.0178395	0.12251	0.0925146	0.0311411	0.0977669	0.0516195
24h	0.0604091	0.159237	0.0482685	0.0866507	0.0400796	0.00692933	0.107799	0.0170856	0.144292	0.0806148	0.0291218	0.105612	0.1139
30h	0.0560334	0.155932	0.0479039	0.102569	0.0496967	0.0160849	0.12022	0.0183632	0.173404	0.0878562	0.0321949	0.0747811	0.0649603
48h	0.0517989	0.153409	0.0420772	0.0993355	0.0659534	0.00920691	0.142197	0.0141272	0.147246	0.103476	0.0419596	0.0737515	0.0554609
72h	0.0210355	0.141398	0.016076	0.123567	0.0732987	0.00274156	0.170502	0.0093121	0.109082	0.163592	0.0508749	0.0909469	0.0275734
144h	0.0199546	0.12966	0.0184625	0.137654	0.0566316	0.00993626	0.137807	0.0124774	0.116533	0.168394	0.0536707	0.0818576	0.0569616

## Sheet: POS
Sample Name	SM(d18:1/14:0)+H	CE(24:0)+NH4	CE(22:6)+NH4	CE(20:0)+NH4	CE(22:5)+NH4	CE(14:0)+NH4	CE(16:0)+NH4	CE(16:1)+NH4	CE(18:0)+NH4	CE(18:1)+NH4	CE(18:2)+NH4	CE(18:3)+NH4	CE(20:2)+NH4	CE(20:3)+NH4	CE(20:4)+NH4	CE(20:5)+NH4	CE(22:0)+NH4	CE(22:1)+NH4	CE(22:2)+NH4	CE(22:4)+NH4	CE(24:1)+NH4	CER(d18:1/14:0)+H	CER(d18:1/16:0)+H	CER(d18:1/18:0)+H	CER(d18:1/20:0)+H	CER(d18:1/22:0)+H	CER(d18:1/22:1)+H	CER(d18:1/24:0)+H	CER(d18:1/24:1)+H	CER(d18:1/26:0)+H	CER(d18:1/26:1)+H	CER(d18:0/16:0)+H	CER(d18:0/18:0)+H	CER(d18:0/20:0)+H	CER(d18:0/22:0)+H	CER(d18:0/24:0)+H	CER(d18:0/24:1)+H	GlcCer(d18:1/16:0)+H	GlcCer(d18:1/18:0)+H	GlcCer(d18:1/20:0)+H	GlcCer(d18:1/22:0)+H	GlcCer(d18:1/24:0)+H	GlcCer(d18:1/24:1)+H	GlcCer(d18:1/26:0)+H	GlcCer(d18:0/22:0)+H	GlcCer(d18:0/24:0)+H	LacCer(d18:1/16:0)+H	LacCer(d18:1/24:0)+H	LacCer(d18:1/24:1)+H
1*1	3.41807	0.130749	0.961178	0.274505	0.873343	0.735028	0.197112	0.518467	0.0528523	0.371875	0.319276	1.64174	0.554907	0.653626	0.391845	0.437578	0.257882	0.917926	0.582832	0.167315	0.339953	2.25733	1.49098	1.30645	2.00201	2.19484	2.01345	2.6328	1.99468	2.97884	2.29482	1.70581	0.819458	1.63213	1.82128	2.58271	2.07606	0.881273	0.776887	2.4237	2.40651	1.76249	1.02676	1.4259	2.57618	1.57586	0.220578	0.435505	0.498019
1*2	6.53718	0.0726142	0.277636	0.15415	0.329611	0.68633	0.21984	1.47952	0.0328259	0.201583	0.36806	0.549724	0.322609	0.505786	0.365169	0.220409	0.133617	0.418578	0.308339	0.144764	0.120635	4.21067	2.35324	1.76189	3.30176	2.75139	2.85252	3.56908	3.26272	4.86479	4.1377	2.52361	1.19911	2.47937	2.74196	3.92263	3.27337	1.03797	0.640036	2.13343	2.12609	1.27834	1.07388	2.23469	1.78557	1.30717	0.557464	0.663436	0.675552
1*3	2.89059	0.0598048	0.465668	0.119123	0.480138	0.195262	0.0624468	0.240935	0.0406355	0.186922	0.200494	0.519599	0.147854	0.212619	0.217432	0.279447	0.0728368	0.170147	0.109016	0.0893368	0.094111	3.17162	1.83381	1.26256	2.09469	2.09046	2.24959	3.0227	3.12855	5.32841	6.14058	2.2281	1.03219	1.78173	1.81194	2.87044	3.05854	0.506637	0.29871	1.1383	0.975853	0.781013	0.642305	1.70971	0.557743	0.521737	0.22129	0.716701	0.307874
1*4	3.12866	0.03284	0.472818	0.0938279	0.474141	0.538022	0.067433	0.177474	0.0141276	0.0838879	0.138422	0.411582	0.178011	0.195918	0.218521	0.240368	0.0838612	0.214153	0.185737	0.0843788	0.0576819	2.62988	1.51826	0.79762	1.80206	2.29277	1.98012	2.41407	2.07449	2.04497	1.6264	1.37994	0.574231	1.46918	1.99027	2.34127	1.83286	0.465584	0.243918	1.38799	1.44439	0.870955	0.466134	0.750989	1.89675	0.898268	0.221321	0.584562	0.244269
1*5	3.44903	0.0927861	0.795114	0.271238	0.57073	0.661237	0.085171	0.253225	0.043075	0.227618	0.324115	1.06893	0.401667	0.40165	0.277415	0.35388	0.199344	0.530572	0.392795	0.122937	0.178775	2.17104	1.48028	0.857124	1.62853	2.14535	1.81132	2.46165	2.29166	2.5817	2.53888	1.78251	0.593597	1.61194	1.68865	2.35183	2.25585	0.531902	0.293549	1.41741	1.3634	0.907031	0.619353	1.27473	1.21463	0.895219	0.272903	0.606017	0.561585
1*6	3.81384	0.07139	0.862209	0.254472	0.935668	0.996307	0.148374	0.338064	0.0538138	0.250631	0.278097	0.858545	0.352847	0.364216	0.425019	0.379497	0.182077	0.442911	0.315564	0.194819	0.130581	4.0641	2.6677	1.76535	3.39616	3.90141	2.66899	3.4481	3.04338	2.76948	2.65363	2.54625	1.29075	3.04757	3.51334	3.74781	3.06734	0.886043	0.387863	2.33868	2.08736	1.09316	0.716838	0.811819	2.28889	1.01496	0.527154	0.888854	0.678719
2*13	3.54765	0.315254	1.04853	0.920218	1.5344	2.41265	0.712137	2.30804	0.426218	1.33502	1.31357	1.25413	1.08499	0.908184	0.903204	1.3101	0.588418	0.958188	0.688628	0.685148	0.415109	2.06138	1.70644	1.56735	2.11085	2.61386	1.91601	2.71986	1.85299	2.01944	1.40904	1.70363	1.76449	2.40004	2.80135	1.96159	2.00638	0.726237	0.802989	1.6947	1.4649	1.12894	0.93536	0.832258	1.02049	1.26014	0.385991	0.571601	0.6456
2*14	2.61467	0.061278	2.55147	0.125133	1.55415	0.255058	0.16746	0.52311	0.0854012	0.69985	0.853707	0.950916	0.572907	0.775252	0.697509	2.76735	0.101845	0.46462	0.375938	0.467901	0.253868	1.45607	1.17413	1.27875	1.17929	1.1612	2.10948	1.51688	2.07225	2.55103	3.90714	1.27559	1.91018	1.47126	1.29946	1.64678	2.26652	0.463595	0.549186	0.731165	0.641289	0.515553	0.560913	0.650204	0.17748	0.434569	0.188643	0.586073	0.299278
2*15	2.36971	0.0450234	0.5676	0.158568	0.780039	1.229	0.475709	1.83233	0.202104	0.581602	0.765544	0.80115	0.418128	0.53454	0.512653	0.538837	0.104319	0.373718	0.290763	0.327726	0.102495	1.33527	1.70953	2.48312	2.08877	1.62068	3.56346	1.64168	1.93941	1.67459	2.14751	1.49472	4.16416	2.96902	2.06341	1.60329	1.99778	0.817457	0.922908	2.28667	1.43741	0.802658	0.895895	0.813301	0.994274	0.809879	0.950241	0.446769	1.09985
2*16	2.65274	0.223951	5.83008	0.359772	2.72926	2.36601	0.589024	1.89463	0.472555	1.24674	1.71504	1.79567	0.941228	1.61875	1.85238	4.91599	0.22534	0.740249	0.777328	0.954849	0.462922	2.34904	1.76282	2.49535	2.25904	2.02222	2.67359	2.73558	3.56109	4.20979	7.12625	1.5105	3.11691	2.25081	2.25132	2.93485	3.51067	0.979675	1.04477	1.71331	1.38961	0.998608	1.24178	1.91348	1.13884	1.38789	0.336129	0.415852	0.548635
2*17	2.39301	0.129727	3.86619	0.962889	2.64361	2.1038	0.585723	2.21114	0.394296	1.35817	1.46972	1.50089	1.23588	1.03173	0.850946	2.70136	0.441976	0.817905	0.629226	0.66632	0.270112	2.24691	1.68991	1.11098	1.66231	2.01947	1.84299	2.24574	2.13936	1.47527	1.29019	1.51651	0.965825	1.41737	1.78344	2.12445	2.11023	0.653071	0.317981	1.03457	1.17195	0.841948	0.610573	0.401273	1.41663	0.696116	0.274284	0.675951	0.196015
2*18	2.00986	0.0803321	2.08993	0.406381	1.59735	1.78615	0.364545	1.03735	0.172531	0.687955	0.909945	0.969966	0.533449	0.538493	0.76435	1.47652	0.224556	0.396489	0.300965	0.423	0.125689	1.21116	1.1849	1.04626	1.45992	1.58133	1.8484	1.65224	1.58965	1.0727	1.13965	1.50571	0.891177	1.41944	1.72994	1.59848	1.70907	0.51666	0.416816	1.06212	1.10869	0.732621	0.614812	0.683496	1.07309	0.677833	0.272685	0.343064	0.350455
2*19	2.11361	0.0841827	1.5751	0.320514	1.91118	0.950687	0.189622	0.687799	0.108334	0.534219	0.704669	1.02081	0.70011	0.623967	0.72689	1.15794	0.217703	0.496371	0.373927	0.408826	0.172654	1.59557	0.882124	0.708004	0.789461	1.22964	1.22498	1.31778	1.11089	0.785167	0.671598	0.92761	1.02702	1.23619	1.56535	1.30997	1.16938	0.466383	0.383186	0.806411	0.859362	0.438763	0.367878	0.433214	1.05578	0.403656	0.283711	0.329805	0.60943
2*20	3.11937	0.574551	4.27472	1.38077	3.372	3.8035	1.15321	3.67421	0.817352	2.43337	2.57825	3.39146	1.90824	1.86521	1.69356	4.07852	1.17803	1.96874	1.27312	1.04091	1.1579	2.05205	1.92438	1.5937	2.58293	2.842	2.71928	3.43246	3.43728	3.23437	3.06241	2.06215	1.5951	2.52574	2.82977	3.64658	3.4507	1.00155	0.625167	1.24372	1.28876	0.988122	0.950772	1.03388	1.68227	1.05372	0.88128	0.997324	0.941086
3*25	2.30732	0.63112	6.84059	1.45017	3.85392	6.20192	2.22941	4.5672	1.49845	4.00959	5.30365	4.73678	2.29902	2.881	4.8694	9.74058	0.922826	2.26772	1.57485	1.90443	1.57254	4.86012	3.11848	4.44475	4.20973	3.4977	4.07715	4.65496	5.71123	8.9054	9.3858	2.96509	4.58483	3.92619	3.55905	5.07533	5.27029	3.6034	2.4365	2.1096	2.1774	2.49727	3.19764	3.7523	2.12294	2.67809	2.98713	2.42718	3.50872
3*26	1.91363	0.332542	2.30421	0.908662	1.91218	3.88985	1.61039	5.30153	0.694167	3.36323	3.06368	2.48711	1.39148	1.51866	2.22352	3.14883	0.502111	1.21433	0.801992	0.812405	0.716942	2.17599	1.95291	2.63082	2.68042	2.73475	2.00747	2.95149	2.81657	3.19905	2.7655	1.90341	2.45956	2.94962	2.49236	2.89033	2.84647	1.77181	1.33734	1.42254	1.44801	1.42236	1.46158	1.33302	1.94444	1.54747	1.41681	0.783259	1.19752
3*27	1.464	0.231142	2.87388	0.601494	1.5079	1.71725	1.58491	2.00751	0.624914	2.18653	4.34483	4.07403	1.09911	1.56909	3.06729	4.55839	0.457334	0.786336	0.650215	0.671652	0.408229	3.07892	2.49444	3.12196	3.16762	2.94349	2.52706	2.79541	3.1232	2.37272	2.84061	1.97693	3.28053	3.49744	2.92193	2.80729	3.43565	2.69202	2.2381	2.49884	2.16736	1.76796	2.09697	2.13198	2.53712	1.73864	1.33789	1.01922	1.50449
3*28	2.5927	0.20069	0.165276	0.479412	0.345018	1.58817	1.27436	1.35181	0.44965	1.69123	1.35611	0.54439	0.87889	0.597859	0.645527	0.210809	0.304422	0.567497	0.480045	0.35834	0.325764	3.51405	3.17428	4.91446	3.60886	2.82235	2.99138	2.62055	3.12238	2.90614	2.84308	3.53025	4.25637	3.53804	2.78925	2.68676	2.96975	3.54103	2.90935	3.27911	2.30657	1.93101	2.78924	1.97896	1.8683	1.67318	2.1595	1.08281	2.27839
3*29	2.33401	0.275918	2.96972	1.6782	1.78152	3.51089	2.11885	3.43683	0.983278	2.44242	3.72624	2.89068	1.60586	1.70632	4.02476	4.47467	0.735454	1.26779	0.785849	0.857881	0.408084	4.04489	3.32238	3.46201	4.37124	4.77023	3.94098	2.99507	2.87348	1.41102	1.3235	3.08137	3.71931	3.92426	4.43153	3.19772	2.54564	2.485	2.47775	2.70286	2.68126	1.42863	1.78804	1.59336	1.95976	1.6588	1.35531	0.785763	1.19862
3*30	2.46539	0.329022	2.51317	1.51304	2.03971	3.85198	1.23652	2.48051	0.816429	2.41846	4.18092	4.45348	2.29328	1.92073	3.22812	3.42201	0.777284	2.09068	1.32052	0.989032	0.663239	2.22473	1.87963	1.92352	2.95353	2.85417	2.83853	3.18158	3.08055	3.65306	2.93333	1.88486	2.38709	2.68903	2.90766	2.84478	3.0616	2.63845	1.751	2.24994	2.03174	1.44449	2.00801	1.93156	2.6164	1.52688	1.80524	0.844225	1.26542
4*34	1.81461	0.738747	1.73232	1.30652	2.12037	2.52372	2.7754	3.21834	1.13825	3.2779	5.73559	2.18587	2.31634	1.981	3.86943	2.1864	1.09917	1.5457	1.25165	1.33244	0.821833	2.54771	2.80055	2.81089	3.62537	3.90812	4.39211	2.76846	2.75399	1.64796	1.5368	2.93501	3.34135	3.56018	4.025	2.67474	2.60405	3.58879	1.79414	1.72033	2.54455	2.27975	1.82819	2.25656	2.24782	1.98433	2.29258	1.67818	1.80101
4*35	1.64083	0.299246	1.85813	0.559207	1.57039	1.45173	0.706702	1.81094	0.212816	1.25535	1.5184	1.70726	1.17581	0.932574	1.11969	1.69688	0.513688	0.603872	0.47469	0.634422	0.269439	4.31906	3.29433	2.8121	2.68418	3.63932	4.2232	2.52664	2.31156	1.21533	1.01913	3.23105	4.26859	3.45582	3.51078	2.71889	2.29977	1.79495	0.978183	0.920795	1.2551	0.950932	0.924465	0.645546	1.88937	0.825498	0.812914	0.457108	0.885109
4*36	1.6893	0.789366	3.78754	4.10417	3.29329	2.98386	1.69383	1.98326	1.26927	2.80375	3.89879	4.67898	3.39491	2.80005	3.501	5.28165	2.13328	2.85239	1.8082	1.64582	0.95789	2.32603	2.39217	1.97898	3.22465	4.26036	3.45746	3.44529	2.64844	1.86385	1.50646	2.54485	2.05032	3.39651	4.01624	3.55944	2.5792	4.63051	2.6668	7.02255	7.1274	4.45644	4.024	2.35422	8.11548	4.38331	2.95246	2.2485	2.58202
4*37	1.74949	0.713886	1.19561	1.76428	1.36696	2.53258	1.39185	2.25082	0.723827	1.55535	2.62189	2.46355	2.01948	1.8537	2.08311	1.72715	1.45322	1.77571	1.25513	0.984651	0.962345	2.86632	2.69094	2.11133	2.81006	2.78946	3.17408	2.68373	2.96014	1.83463	2.34307	2.71855	2.48543	3.25269	3.30427	2.60289	3.27546	4.73996	2.87452	5.14752	4.43085	3.75148	4.69945	2.89746	5.39074	3.62145	8.48693	4.84355	7.19973
4*38	1.42418	0.355733	1.63285	0.700449	1.16695	1.58154	1.19651	1.57079	0.310099	1.28655	1.83461	1.23994	0.844268	0.985676	2.07922	1.78109	0.517785	0.590271	0.429	0.688839	0.507935	1.71354	1.95731	1.84263	1.60018	1.56208	1.79462	1.47276	1.82518	0.994858	1.14202	2.21351	2.31727	2.2375	1.67067	1.36083	1.85869	2.63402	1.3734	1.3355	1.63677	1.46647	1.73053	0.806309	1.45137	1.2977	1.21841	0.811013	1.24975
4*39	2.24936	0.684883	0.127883	1.95742	0.417829	0.82769	1.74879	1.8587	1.1887	2.54802	1.79049	0.461744	2.10033	0.858603	0.646367	0.230837	1.09465	1.88045	1.34015	0.797314	0.806849	3.30967	5.46642	5.04933	7.6383	5.21502	6.91963	3.80306	3.54641	3.57162	2.70646	5.27273	5.15707	6.91691	6.00022	3.95735	3.593	4.63788	3.93833	4.10221	3.06054	2.12903	2.60419	2.4889	4.27362	2.24535	4.31789	1.313	3.66919
5*43	2.51699	1.69734	3.99267	4.11626	3.4484	2.21018	2.26409	2.10872	1.09341	1.52609	1.64163	4.02899	2.81149	2.59425	2.29109	2.80562	3.21318	2.88661	2.19515	1.65137	1.9457	2.86858	2.94426	1.60081	2.45667	3.24157	3.22039	3.70377	3.09473	2.78621	2.4155	2.68615	1.91346	2.53417	3.20689	3.54246	3.12045	3.71515	2.42709	5.56441	6.31958	4.88507	4.29781	3.12721	6.67215	4.71903	7.09586	5.48041	6.32836
5*44	1.19548	3.03697	2.94225	2.03497	2.57829	2.21655	4.1485	3.44956	1.75619	2.4101	2.58155	1.43326	2.57328	2.62907	3.68759	4.47579	3.45248	1.72027	2.19357	2.25024	3.09105	0.939427	1.52474	1.35306	0.607124	0.757567	0.915844	0.948741	1.12002	0.885815	0.795581	1.76905	1.56693	0.858617	0.970379	0.986496	1.1068	2.98299	1.67777	1.04285	2.53187	3.65671	3.52212	4.74974	2.38645	3.56327	2.61805	2.45295	2.92282
5*45	1.33825	2.96979	3.80005	1.56731	2.53989	1.7745	3.97221	2.35951	2.07613	2.60851	2.52551	1.13698	2.664	3.1	4.87815	4.40705	2.1561	1.4831	2.10559	4.04558	3.65954	0.912841	1.8728	1.20307	0.443383	0.568912	0.835617	0.777357	0.950461	0.768625	0.997509	1.65535	1.60409	0.669675	0.681632	0.764347	0.986333	3.2095	2.37993	1.22445	2.06722	3.14847	3.51782	2.33069	2.52105	3.02038	6.10789	7.06279	6.21571
5*46	2.14058	1.70309	1.45937	2.47989	2.1188	2.50968	2.6907	1.42427	1.38473	2.28774	2.49865	2.05866	2.98312	3.43657	2.40339	1.24388	2.61132	2.15237	2.45789	2.62265	2.21786	2.0526	2.27207	1.88059	2.24158	2.3305	2.1114	2.49394	2.12762	2.54816	2.25682	2.41363	1.82491	2.44234	2.49755	2.44661	2.22064	4.49991	3.18063	5.19258	5.22611	4.81446	4.57309	4.17857	4.69673	4.51454	8.15092	5.72845	7.34512
5*47	1.79582	1.67064	1.92118	1.99701	3.26203	1.80798	2.17124	1.99741	1.58157	2.22923	2.65198	2.02516	3.15141	3.39101	4.09051	2.89559	1.84163	1.98094	2.65046	3.10505	2.57797	1.18353	1.70924	1.51598	1.33781	1.45048	1.61823	1.89789	2.05408	2.58994	2.52004	1.52728	1.67017	1.4665	1.71962	2.22947	2.11152	4.38656	5.24804	5.5948	5.51767	4.58789	5.57589	4.83393	4.66699	4.24636	11.382	8.14524	7.40515
5*48	2.39815	3.85282	0.477038	3.20935	1.0663	2.48035	3.13038	2.01921	2.08634	2.15218	1.76078	0.675281	3.00947	2.3948	1.65951	0.719196	4.04507	3.11759	2.49312	2.08663	3.59732	1.04531	1.75275	2.30489	1.13421	1.41484	1.14275	1.47582	1.35764	1.54917	1.44635	1.55841	2.1137	1.76712	1.82157	1.26602	1.50526	2.8212	2.47308	3.73323	3.16429	3.85797	3.15768	4.29141	2.86433	3.98012	4.96353	4.3871	4.43936
6*52	0.8331	6.47713	2.08118	3.99535	3.65543	2.58535	5.89394	1.92284	6.85174	3.60478	2.23242	1.08832	4.08081	3.79578	4.34806	1.60368	5.23142	3.16597	4.65503	5.52302	5.84709	1.52365	3.04184	3.00372	1.41627	1.2335	1.35206	1.05279	1.40025	0.838387	1.05662	3.19762	2.54185	1.4237	1.22315	0.975666	1.53643	3.46921	3.86379	1.13337	2.46811	4.56409	3.85502	3.7742	1.97793	4.11072	1.96813	3.02859	2.30202
6*53	0.976493	8.65634	1.31109	6.54741	3.61423	4.35401	8.22191	3.97705	10.7297	5.43394	2.54334	1.32114	4.967	4.49348	3.70623	1.01054	6.53877	4.65742	6.23701	8.45321	8.33022	1.74912	2.89338	4.63556	1.98512	1.49579	1.53079	1.24792	1.75428	1.06898	1.37293	2.8441	3.75371	1.7242	1.51302	1.25865	1.74437	6.03545	18.5565	5.69841	3.08142	4.30998	8.47834	4.03192	3.39114	4.37566	3.64956	5.07062	3.05013
6*54	0.954184	2.10613	2.87566	1.50133	2.27985	1.59997	2.4561	2.08016	1.99401	1.48748	1.52577	1.00963	1.83317	2.50815	3.54895	1.60711	1.87044	1.23784	2.27215	3.32622	2.41382	1.25013	2.37573	2.00836	1.04359	1.10308	1.16188	1.07916	1.23848	1.12202	1.18757	2.38794	1.81701	1.08104	1.23502	1.086	1.17164	2.82851	2.83136	1.14136	1.83665	3.1915	3.00626	3.43347	1.47914	3.12882	1.82855	2.58752	2.23245
6*55	1.7605	6.21965	1.50851	5.57987	2.50259	1.68246	5.45661	2.64329	4.13909	3.65601	2.98463	1.56328	3.77256	4.23096	3.23878	1.79067	5.66535	3.74576	3.50333	4.14126	4.48907	1.14336	2.03308	2.42207	1.5769	1.34886	1.17875	1.41625	1.50241	1.47336	1.45655	1.86035	2.80839	1.4476	1.4798	1.40189	1.57035	2.22311	2.26056	1.38487	2.12629	3.457	2.78036	3.57661	1.86869	3.90018	2.78939	3.93812	2.96883
6*56	1.01319	7.85766	5.75535	5.68995	5.02935	2.34433	5.86352	3.25654	5.84719	4.48712	3.54087	4.15051	5.07944	6.53371	5.26153	4.59664	6.53816	4.60844	5.50898	6.82089	6.6258	1.32941	2.48386	2.31471	1.54108	1.44282	1.40143	1.60609	1.60114	1.8222	1.749	2.20086	2.07473	1.44767	1.51471	1.64505	1.63717	2.42259	2.56662	1.26737	1.821	3.76106	2.84393	2.78131	1.84557	3.7024	2.65338	5.92823	3.66562
6*57	2.09156	1.57772	1.36828	3.56162	2.12036	2.45163	1.55892	3.22426	1.04615	2.09	1.93486	3.601	2.65793	2.8087	1.47611	1.28259	2.60081	3.75116	2.44879	1.8548	1.83953	2.58771	2.15556	1.196	1.76027	1.96004	1.42453	2.03448	1.58979	1.46975	1.31803	2.33894	1.01265	1.51111	1.67662	1.99565	1.63124	1.25122	1.30676	1.58596	1.44074	1.6479	1.25342	1.61178	1.39713	1.65046	1.136	1.88093	1.32901
7*61	3.97054	1.5811	0.365449	4.11945	1.07556	3.45684	1.1773	1.51085	0.592825	1.50102	0.846638	1.11317	3.09831	3.29236	0.507139	0.177012	3.61238	6.69062	3.73371	1.01037	2.02581	2.29332	2.43585	2.53967	1.76695	1.93621	1.53932	1.97331	1.68352	1.85867	1.86189	2.65414	2.16938	1.74995	1.85345	1.96947	1.64232	1.1168	2.00181	1.49161	1.19483	1.43449	1.43343	2.04506	0.51898	1.70143	1.28495	1.75626	1.89507
7*62	0.426226	5.78157	1.04292	4.13811	2.08927	3.49421	4.18571	2.9379	4.92342	3.04589	2.10433	1.23388	2.38159	2.7463	1.8337	0.56528	4.70782	3.93465	3.39936	3.44522	5.01304	0.571856	1.56345	2.17744	0.94118	0.747301	0.441936	0.548623	0.729783	0.637535	0.602734	1.71571	1.51442	0.845952	0.636829	0.565149	0.768583	1.00329	1.88876	0.823868	0.994342	1.553	1.331	1.50098	1.41244	1.46547	0.789279	2.61448	1.42315
7*63	0.680217	7.62939	1.73186	6.82092	4.56031	3.1141	7.04646	4.11674	7.14478	6.98135	5.07005	5.32208	7.06066	6.79276	3.50533	1.39805	7.25938	7.78482	9.04094	8.096	8.59781	1.08881	2.25806	3.06937	1.50969	1.22073	1.18643	1.09504	1.42529	1.37199	1.24432	1.96722	2.38151	1.32546	0.990553	1.1372	1.47894	2.653	3.78578	1.29208	1.8568	3.73268	3.24887	2.83662	1.08737	3.60176	2.04502	4.59222	3.32803
7*64	0.597858	28.4886	11.9098	18.0063	13.9031	8.20186	13.7661	8.23749	33.3472	13.286	10.3521	15.2592	13.9164	12.0879	11.2272	9.20749	22.5266	17.0088	23.488	22.656	23.5626	1.46483	3.54865	5.7416	3.3084	2.63251	1.1817	2.08212	2.10699	2.17238	1.57115	3.26017	4.8369	3.14211	2.39088	2.05801	1.98737	4.69859	7.42144	2.38527	3.22704	6.44387	5.1864	9.90575	3.25311	8.14457	3.46616	6.50461	3.92561
7*65	3.40407	1.06676	1.70487	1.57311	2.73722	1.71999	1.06249	2.55203	0.464811	1.52377	1.09061	3.63066	2.72089	3.09753	0.941466	0.848641	1.44433	3.35504	2.5033	1.3258	1.73176	3.11279	2.2067	2.06895	2.23795	2.08584	1.89947	2.0872	2.11407	2.06328	1.87407	2.21619	1.67328	1.83052	1.75485	1.95089	1.95477	0.999511	1.09218	1.23857	1.11452	1.35497	1.25138	0.969709	1.08551	1.33256	0.76567	1.60062	1.63795
7*66	4.20398	0.0705041	0.113054	0.237179	0.2574	0.615808	0.348461	1.16766	0.114767	0.650985	0.800223	0.689917	0.466892	0.231489	0.1409	0.0480794	0.161745	0.365258	0.337208	0.130209	0.130419	3.08959	3.00562	1.82686	1.75989	1.56579	2.03965	1.76984	1.87791	1.80734	1.7818	3.32663	1.471	1.67628	1.31303	1.70193	1.7015	0.991572	0.558547	2.28099	1.37842	0.932867	0.811641	0.881907	1.57928	0.724565	0.568951	0.685537	1.58928
[truncated: 296 more columns]

## Sheet: POS-Abundance Proportion
	SM	CE	CER	GlcCer	LacCer	PE-P	TAG	DAG
0h	0.0138413	0.0260309	0.140775	0.040629	0.00537199	0.58497	0.0686454	0.119737
6h	0.00962519	0.0812036	0.112753	0.028412	0.0052813	0.405688	0.134928	0.222109
24h	0.00603157	0.129674	0.155176	0.0578079	0.0135869	0.201751	0.245157	0.190815
30h	0.00467625	0.0909017	0.114037	0.0645305	0.0173699	0.179235	0.324796	0.204453
48h	0.00445378	0.130887	0.0689709	0.0863309	0.0457099	0.198633	0.269142	0.195873
72h	0.00334279	0.161439	0.0652694	0.0563913	0.0190754	0.191337	0.302409	0.200735
144h	0.00357304	0.170157	0.0519607	0.033208	0.0115509	0.150652	0.325206	0.253692
