# Supplementary material for: Time-Course Lipidomics of Ornithine-Induced Severe Acute Pancreatitis Model Reveals the Free Fatty Acids Centered Lipids Dysregulation Characteristics
Source: Metabolites. 2023 Sep 5;13(9):993. doi: 10.3390/metabo13090993 (PMC10647642; doi:10.3390/metabo13090993)
Supplement: Supplementary file 1 [file metabolites-13-00993-s001.zip › Table S5-counts and proportion in pancreas.xlsx]

## Sheet: COUNTS
	cluster1	cluster2	cluster3	cluster4	Nochange	total
LPC	6	0	1	0	12	19
PC	26	1	28	1	23	79
LPE	6	0	0	0	12	18
PE	4	0	46	11	9	70
PE-O	0	4	1	10	7	22
LPG	0	0	0	0	4	4
PG	11	14	2	8	19	54
LPI	1	1	0	0	6	8
PI	9	4	30	3	20	66
PS	0	6	11	8	31	56
CL	0	4	4	5	5	18
PA	20	5	2	7	8	42
FFA	3	0	0	3	21	27
SM	0	0	0	0	1	1
CE	0	18	0	0	2	20
CER	1	0	0	0	15	16
GlcCer	0	8	0	0	1	9
LacCer	0	3	0	0	0	3
PE-P	12	5	12	2	12	43
TAG	0	1	0	0	178	179
DAG	0	10	1	0	63	74

## Sheet: PROPORTION
	cluster1	cluster2	cluster3	cluster4	tc小于30	total
LPC	0.315789	0	0.0526316	0	0.631579	1
PC	0.329114	0.0126582	0.35443	0.0126582	0.291139	1
LPE	0.333333	0	0	0	0.666667	1
PE	0.0571429	0	0.657143	0.157143	0.128571	1
PE-O	0	0.181818	0.0454545	0.454545	0.318182	1
LPG	0	0	0	0	1	1
PG	0.203704	0.259259	0.037037	0.148148	0.351852	1
LPI	0.125	0.125	0	0	0.75	1
PI	0.136364	0.0606061	0.454545	0.0454545	0.30303	1
PS	0	0.107143	0.196429	0.142857	0.553571	1
CL	0	0.222222	0.222222	0.277778	0.277778	1
PA	0.47619	0.119048	0.047619	0.166667	0.190476	1
FFA	0.111111	0	0	0.111111	0.777778	1
SM	0	0	0	0	1	1
CE	0	0.9	0	0	0.1	1
CER	0.0625	0	0	0	0.9375	1
GlcCer	0	0.888889	0	0	0.111111	1
LacCer	0	1	0	0	0	1
PE-P	0.27907	0.116279	0.27907	0.0465116	0.27907	1
TAG	0	0.00558659	0	0	0.994413	1
DAG	0	0.135135	0.0135135	0	0.851351	1
