# Supplementary material for: Time-Course Lipidomics of Ornithine-Induced Severe Acute Pancreatitis Model Reveals the Free Fatty Acids Centered Lipids Dysregulation Characteristics
Source: Metabolites. 2023 Sep 5;13(9):993. doi: 10.3390/metabo13090993 (PMC10647642; doi:10.3390/metabo13090993)
Supplement: Supplementary file 1 [file metabolites-13-00993-s001.zip › Table S6-lipids in serum.xlsx]

## Sheet: NEG
	LPC(14:0)+AcO	LPC(15:0)+AcO	LPC(16:0)+AcO	LPC(16:1)+AcO	LPC(17:0)+AcO	LPC(18:0)+AcO	LPC(18:1)+AcO	LPC(18:2)+AcO	LPC(18:3)+AcO	LPC(19:0)+AcO	LPC(20:0)+AcO	LPC(20:1)+AcO	LPC(20:2)+AcO	LPC(20:3)+AcO	LPC(20:4)+AcO	LPC(20:5)+AcO	LPC(22:4)+AcO	LPC(22:5)+AcO	LPC(22:6)+AcO	PC(14:0_16:0)+AcO	PC(14:0_18:1)+AcO	PC(14:0_18:2)+AcO	PC(14:0_20:4)+AcO	PC(15:0_16:0)+AcO	PC(15:0_18:1)+AcO	PC(15:0_18:2)+AcO	PC(15:0_20:4)+AcO	PC(16:0_16:0)+AcO	PC(16:0_16:1)+AcO	PC(16:0_18:0)+AcO	PC(16:0_18:1)+AcO	PC(16:0_18:2)+AcO	PC(16:0_18:3)+AcO	PC(16:0_20:1)+AcO	PC(16:0_20:2)+AcO	PC(16:0_20:3)+AcO	PC(16:0_20:4)+AcO	PC(16:0_20:5)+AcO	PC(16:0_22:4)+AcO	PC(16:0_22:5)+AcO	PC(16:0_22:6)+AcO	PC(16:1_18:0)+AcO	PC(16:1_18:1)+AcO	PC(16:1_18:2)+AcO	PC(16:1_20:4)+AcO	PC(17:0_18:2)+AcO	PC(17:0_20:4)+AcO	PC(17:0_22:6)+AcO	PC(18:0_18:1)+AcO
1*1	3.86032	2.73583	3.04156	4.77931	2.72809	2.89186	4.45062	3.44767	3.37356	3.37781	3.01365	4.12245	3.58759	4.95453	3.05479	4.06482	2.7358	3.21846	4.00068	2.67858	4.70896	4.07543	3.464	2.00909	3.57161	2.16497	2.85786	2.60144	5.07382	3.5204	3.57908	2.82091	3.12139	2.90502	3.39419	4.42561	2.87054	4.16747	2.08123	2.61757	3.07059	3.33929	5.38787	4.26068	4.39174	2.82488	2.29559	3.35972	4.2354
1*2	3.09177	2.45295	2.77877	3.67422	2.08998	2.91214	3.23384	2.99642	2.69671	2.12261	2.61151	2.94077	2.9672	4.41251	2.47335	3.64001	2.36063	3.24583	2.63998	1.68372	3.35943	3.07942	3.18303	2.24602	2.36627	1.91177	1.65484	2.43553	3.22502	3.19281	3.21023	2.71868	2.95863	2.31867	3.59404	4.43478	2.29673	3.27779	2.73414	2.83596	2.53932	4.18891	3.2798	3.37698	3.43125	2.54311	2.01885	1.67956	3.42799
1*3	1.49356	1.73243	2.04948	1.66365	1.65223	1.79789	1.26549	1.28132	1.19201	2.21715	1.82001	1.33922	0.98878	0.547585	1.96606	0.986324	1.06463	1.16198	1.41982	4.47794	3.00226	5.10485	4.31338	2.92064	2.28357	2.97306	4.09619	4.02262	3.5162	2.787	4.5632	3.82619	2.62882	2.2392	2.72269	3.06283	4.19636	2.78297	2.23426	2.51701	3.52659	1.98351	2.5278	4.79724	3.41187	1.59235	3.03759	3.26218	3.13245
1*4	2.97133	2.21006	2.65153	3.22482	2.15931	2.42726	3.18725	2.54915	2.42505	2.369	2.98515	3.38684	2.68768	3.37955	2.29782	2.3021	2.31788	2.17489	2.27631	2.92178	3.22689	2.59768	2.55839	1.4898	2.22825	2.01198	1.93122	1.9701	2.29866	2.43246	2.50831	2.30606	2.60583	3.22582	2.71197	3.52198	2.31519	2.52689	3.05794	2.69956	2.25822	3.38136	3.04283	2.92429	2.92101	2.24789	1.83044	1.79257	2.95158
1*5	3.62543	2.74332	2.71746	4.37303	2.52387	2.41061	4.12043	2.79725	2.5713	2.81608	3.50087	3.57757	3.24576	5.14261	2.41163	2.74326	2.51646	2.85768	3.27772	3.6419	5.20351	3.64216	3.31493	2.25636	3.2912	2.75612	2.96609	2.13146	4.4103	2.64683	3.85396	2.74106	2.41041	3.57291	3.41297	5.10955	2.84154	3.72277	2.34421	2.90515	2.79968	3.7496	6.38948	4.83533	4.49623	2.89844	2.00659	2.80999	3.75181
1*6	3.30562	2.86568	3.24858	3.8792	2.47916	2.56177	3.42563	3.37093	3.16332	2.48397	2.968	2.99083	2.69722	4.27227	2.66293	2.97332	2.93348	2.86929	3.18919	3.42607	4.16468	2.65811	2.90655	3.49961	3.01856	2.84984	2.20198	2.90043	3.97617	3.18285	3.38684	2.96623	4.23107	2.85077	3.25539	4.19099	2.77043	3.70469	2.33336	2.31687	2.70935	4.21635	3.68321	3.677	3.47443	2.47467	2.17628	1.83938	2.9954
2*13	1.18845	1.29707	1.43832	1.06095	1.25183	1.34933	0.940166	0.705295	0.686551	1.48275	1.45325	1.02172	0.84175	0.441613	1.0867	0.612069	1.17212	1.2376	1.13877	3.23913	1.36433	1.29343	1.27657	1.98378	1.25969	0.96264	0.870899	1.97914	1.49756	1.53069	1.78763	1.27645	0.960856	1.68159	1.72317	1.05869	1.49526	0.773737	2.24772	2.37807	1.98028	1.13154	1.40151	0.942726	1.04155	0.763948	1.56621	1.90673	1.54994
2*14	0.946236	0.704756	0.912172	0.850579	0.692756	0.742844	0.649923	0.482795	0.505199	0.846681	0.815507	0.524994	0.402623	0.3341	0.656584	0.252679	0.771492	0.805998	0.763528	1.86915	1.43027	1.37787	1.32684	1.31899	1.01452	0.665493	0.855302	2.03111	1.34606	0.8482	1.58764	0.958829	0.770356	1.67864	1.76157	0.905741	1.14312	0.346698	2.426	1.89222	1.55632	1.09154	1.34286	0.970113	0.727214	0.751232	0.720752	1.66395	1.18305
2*15	0.81668	1.36901	1.3124	1.04585	1.34769	1.34132	1.00692	0.851349	0.679258	1.52839	1.33552	0.908359	0.804765	0.64438	1.28875	0.711418	1.09435	1.29759	1.24368	3.34788	1.08935	0.953146	0.878658	2.45845	1.74805	1.27697	1.37724	2.46703	1.77085	1.60957	2.00847	1.46637	0.918412	1.2539	1.74171	1.021	1.72303	0.851358	2.23806	1.8325	1.96846	1.44161	1.39867	0.974508	1.39997	1.12556	2.05949	2.87968	1.56837
2*16	0.889296	1.13863	1.37622	0.882238	1.29427	1.39833	0.912827	0.720452	0.532927	1.67827	1.1345	1.14159	0.780869	0.360633	1.09106	0.582638	0.840533	0.766152	0.844669	1.25641	1.01852	0.742331	0.796364	1.58566	1.3645	0.756964	1.39725	1.59623	0.997666	1.11564	1.65721	1.21426	0.600046	1.49142	1.33764	1.05559	1.58512	0.805909	1.61633	1.34279	1.76109	0.966665	1.16381	0.728909	0.835414	0.945378	1.91358	2.28334	1.6351
2*17	1.99717	1.46778	1.681	1.58786	1.48924	1.69482	1.364	1.04536	0.991259	1.74287	1.67362	1.36112	1.02712	0.672589	1.46392	0.666578	1.34621	1.47021	1.40202	4.47242	2.31916	2.47671	3.80392	3.54986	2.86164	1.75147	2.34888	3.08547	2.92152	1.91946	2.61036	1.60869	1.32251	2.64748	2.09745	1.53698	2.84578	1.70608	2.82642	3.03274	3.09004	1.81545	2.33464	1.85358	2.21677	1.75985	2.69428	3.68686	1.8712
2*18	1.87641	1.75768	2.13496	1.42714	2.0173	2.43857	1.38927	0.996778	0.979062	2.92227	2.68095	1.77476	1.23785	0.470183	1.77497	0.589971	1.90303	1.78114	2.04794	3.69937	1.33316	2.42827	3.12424	3.26784	2.29383	1.47543	2.80945	3.07989	2.85204	2.36502	2.67773	1.95948	1.52315	3.13033	2.7097	1.70632	3.14286	1.33675	4.18952	3.96434	4.23232	2.51839	1.89534	1.90322	2.5631	1.54553	3.01231	4.27881	2.55809
2*19	3.2031	1.97686	2.7047	4.1488	1.81544	2.3856	3.77524	3.15601	2.77857	2.30499	2.45451	2.67517	3.35828	5.65392	2.53473	3.64092	2.74794	3.44202	2.89112	1.3602	3.22014	1.82267	1.88337	1.363	1.64652	1.1756	1.10838	2.16529	3.10125	2.38824	3.05405	2.27448	1.54393	2.17376	2.29084	4.45513	1.88756	2.2916	2.01368	2.94843	1.89272	2.42998	3.92813	2.57365	2.14506	1.4831	1.02846	1.50153	3.52392
2*20	1.14214	1.06219	1.44156	1.09492	1.0309	1.35584	1.0421	0.847444	0.789548	1.46833	1.35253	1.04215	0.807968	0.522315	1.24908	0.519197	1.03549	1.07308	1.09744	4.23266	1.88208	1.62228	2.4823	1.81411	1.89743	1.20476	2.56443	2.52246	2.61855	1.39135	2.11337	1.71878	2.28662	2.27214	2.08121	1.64409	2.66855	1.51189	3.06117	2.23725	2.48404	1.60068	1.35532	1.41506	2.46734	1.23039	2.58351	1.78723	2.45123
3*25	1.74223	1.92893	2.528	1.48673	2.01995	2.27211	1.92626	2.70864	1.93185	2.03613	1.94637	2.68776	2.06036	1.80707	2.58084	5.59097	2.08238	2.32575	3.05769	2.22109	0.95322	1.1755	0.84452	2.41405	2.20086	1.58421	1.47237	2.4065	1.07639	2.20657	1.57038	2.65409	2.26288	3.94858	2.22	1.6568	2.14065	4.02875	2.00386	1.72658	2.52324	1.30749	0.920043	1.46188	1.07623	2.17189	1.76158	1.90762	1.83673
3*26	1.43013	1.39744	2.24717	1.47101	1.59479	1.90647	1.38866	1.45685	1.00093	1.60755	1.357	1.38907	1.04169	0.626241	1.72217	2.58848	1.37095	1.44431	2.06423	0.563616	1.12052	1.14501	0.715224	0.966831	1.53945	0.919692	0.980269	1.74671	1.11179	1.45043	1.8164	1.65481	0.975128	1.8504	1.14583	0.850804	2.25915	2.42062	1.45866	2.49153	2.90273	0.589972	0.965464	1.04886	1.10173	1.15094	1.51262	2.35918	1.55579
3*27	1.7681	2.02211	2.45866	1.56607	2.64356	2.91027	1.88222	2.71625	1.86545	2.7583	2.52635	2.70422	2.31786	1.31775	2.89565	4.15697	2.25102	2.08473	2.60056	3.60098	1.38379	2.49551	3.13897	2.98975	1.4884	2.47447	2.27045	2.32497	1.64245	3.31588	1.72337	2.52164	2.32726	2.51034	1.95358	1.73801	3.02349	4.94512	1.78493	1.76481	2.42323	1.63012	1.1825	1.97701	2.03988	2.84679	3.74004	2.81056	2.12126
3*28	1.45501	1.54491	1.95832	1.25985	2.14614	2.42683	1.54759	1.70338	1.19405	2.21092	1.85706	2.41041	1.53258	1.17531	2.58811	2.73816	1.59558	1.59342	1.78373	1.657	0.641513	1.23137	1.87613	2.52991	1.63245	1.43441	1.89531	2.01203	1.28184	2.55766	1.48683	1.82893	1.84855	2.47727	1.51089	1.67308	3.20296	3.47042	1.60516	1.43656	1.84219	1.4486	1.11256	1.27243	1.8527	1.91563	3.53609	1.64232	1.93661
3*29	1.79551	1.51046	2.2215	1.43945	1.79789	2.05042	1.54913	1.92025	1.69303	1.70576	1.52309	1.43742	1.42891	1.2602	2.61753	3.11468	2.44485	3.13661	3.03439	2.73145	1.35331	2.03766	2.97505	2.76771	1.64618	1.73411	2.2991	2.94696	1.85538	3.48584	2.26002	2.88937	2.47692	2.8315	2.35144	2.13365	3.88384	4.10115	2.87365	3.54484	3.79434	1.55998	1.35298	1.82603	2.22196	1.79803	2.61659	2.25333	2.22956
3*30	1.25782	1.77899	1.94888	1.13639	1.97933	2.21109	1.8871	2.71453	2.52127	2.31027	2.22154	2.40667	1.82617	1.66324	2.20121	2.42466	2.62151	1.71517	2.33819	2.39943	1.53374	1.44045	1.26389	3.0994	2.0929	2.47641	1.77799	2.57811	1.08685	2.15541	2.15588	3.35331	4.3342	3.17181	2.27335	2.23023	2.29692	2.59877	2.3112	1.34345	2.3125	1.11363	1.12413	1.97476	0.981713	3.81772	2.47608	1.75981	2.33965
4*34	1.78895	2.01771	2.38261	1.44442	2.3273	2.29619	1.84644	2.5473	2.27091	2.7378	2.10225	2.15542	1.87193	1.29024	2.51671	3.08763	2.04794	1.83169	2.2549	2.20346	1.36314	2.28032	2.68782	3.31066	2.27178	2.84385	2.92506	3.24424	1.35607	3.11736	2.00022	2.97662	3.90834	3.56994	2.06935	2.13051	2.97983	3.5213	1.89499	1.89928	2.60343	1.61579	1.35512	1.97872	2.0237	2.99408	3.01831	2.35515	1.84404
4*35	0.902958	0.819129	1.51016	0.872369	0.927724	1.20751	0.680987	0.649772	0.566439	1.03607	0.89811	0.617237	0.59138	0.280097	0.875901	0.837256	1.23226	1.10475	1.4409	3.80277	5.43505	2.46661	1.87871	2.00586	1.3494	1.29168	1.60431	3.73638	2.37507	2.14075	3.88078	2.49126	2.13698	3.14967	3.93376	1.38797	2.90744	3.50531	4.92921	5.12187	5.92754	1.70424	1.36254	1.48051	1.282	1.3367	1.87322	4.84594	2.32352
4*36	1.90419	2.12397	1.99111	1.4413	2.08519	1.88296	1.9871	2.69789	2.90891	1.90892	1.94999	2.16811	2.10413	1.3712	2.47301	2.57406	2.26191	1.90598	2.2797	2.30206	1.67599	2.33697	2.5381	2.1993	1.61836	2.66523	2.45871	2.33691	1.09296	2.31647	1.85583	2.60147	3.73147	3.15587	2.04637	1.65348	2.50066	2.76835	1.88002	1.64057	1.99096	1.51345	1.34192	2.3139	1.97215	3.15481	2.711	1.89317	1.92978
4*37	2.67308	2.41835	2.60616	1.9059	1.94459	1.89462	2.06712	2.57655	2.66144	1.46582	1.54725	1.86637	1.59167	1.38439	1.99253	2.29144	1.76913	1.81858	1.84623	1.30139	2.28456	2.55559	2.05909	2.0036	2.3375	2.56911	1.64257	2.2766	1.63785	1.63927	2.47666	2.93455	3.6093	2.52248	3.15064	1.8231	2.20313	3.07501	2.16057	1.66461	2.36238	1.65838	2.20487	2.74914	1.47035	2.76362	1.85627	1.13115	1.86559
4*38	1.40898	1.27385	1.90809	1.2205	1.35344	1.86037	1.41434	1.38617	1.03813	1.21578	1.16481	1.11527	1.11189	0.589633	1.67098	1.93496	1.3705	1.52046	1.60779	1.78323	0.854281	1.2985	0.799199	2.36439	1.39926	1.12159	0.839291	2.58918	1.35833	1.941	1.60092	1.90113	1.53576	2.13062	1.75312	1.3002	1.70334	2.44111	1.9374	2.30565	2.15233	1.01049	0.901337	1.21579	0.942787	1.56374	0.87244	2.08254	1.64265
4*39	0.727728	0.871622	1.08336	0.757414	0.602411	0.648003	0.770674	1.30257	0.713126	0.540152	0.597279	0.679404	0.521905	0.420403	1.16738	0.824229	1.35174	1.31434	1.23808	1.07919	0.330655	0.47922	0.427531	1.78989	0.908074	0.729661	0.511984	1.45706	0.981337	0.340068	0.749893	1.04202	0.989112	1.20854	0.991281	0.332479	0.82263	0.652566	0.976808	0.641665	0.704322	0.719643	0.251956	0.430001	0.276807	0.750422	0.529303	0.473462	0.530557
5*43	4.62607	4.58534	3.98767	7.54893	5.0098	3.3467	4.89225	3.11061	4.16249	4.1231	3.98487	4.22564	3.38432	3.80781	3.45807	3.48227	3.56538	4.27408	3.38626	0.267989	3.66794	2.27535	2.98931	1.51258	3.30602	2.87908	3.68633	2.4439	4.65899	3.35877	4.04121	2.37711	3.15813	2.79612	2.97123	3.60753	2.75329	2.19809	3.69458	4.47444	2.99446	5.92775	6.74685	4.49684	6.04921	2.99459	3.28753	2.60301	3.20739
5*44	1.81	1.5374	2.34285	1.54033	1.81127	2.48279	1.68188	2.03179	2.33561	1.50436	1.41351	1.46409	1.6529	1.12896	2.01474	1.69448	1.33947	1.60083	2.43672	0.634122	0.669311	0.954614	0.432349	0.849709	0.535497	1.03405	0.526576	1.40636	0.648842	1.74822	1.25786	1.47392	0.950451	0.80535	1.29011	0.826333	1.07218	0.613224	1.17076	1.03115	1.74309	0.662514	0.56867	0.912061	0.746602	1.41013	0.806363	1.12035	1.4173
5*45	2.4512	2.01362	3.27212	1.79595	2.42609	3.25882	2.49691	2.70472	2.59632	2.68745	2.25414	2.51379	2.89601	1.32298	2.49049	1.37076	2.01403	1.5535	2.21608	0.762273	0.916957	1.14085	0.817756	1.18824	0.777906	1.22394	0.870234	2.35866	0.913519	2.55159	1.58441	1.94909	1.00995	1.86848	2.15706	1.07189	1.39174	0.610285	1.50249	1.02329	1.55589	0.907537	0.829667	1.21084	0.851397	1.5383	1.01096	0.838056	1.14216
5*46	6.14461	4.78819	4.95804	4.7518	5.13718	5.11452	4.14818	3.97928	5.54929	5.36024	5.54876	4.9105	4.29195	4.43505	4.02872	4.54467	4.48069	5.04681	4.84644	2.84588	4.46362	4.03624	4.25402	3.76669	3.83795	3.78637	4.08892	3.28549	3.07628	4.53207	3.60525	3.25581	4.57757	3.22741	3.20941	4.94477	3.10843	3.39983	4.59854	3.85846	3.74795	5.37245	3.4944	3.40945	3.77243	4.04063	3.96516	3.57359	3.8543
5*47	3.58244	4.04671	3.05158	3.15638	4.09845	3.45057	2.8531	3.31219	4.3643	3.62609	4.0475	3.51781	3.29877	2.6196	3.27366	3.66075	3.69146	4.239	2.85615	2.17719	2.86761	4.30702	4.20702	3.32832	3.94855	3.96325	4.3838	2.57604	2.19834	2.70338	2.32027	3.32598	4.93015	2.82828	2.34577	2.57995	2.92694	2.99336	3.34726	3.76209	2.2296	3.39293	3.15773	3.18333	3.68197	3.92448	3.54528	3.45313	2.69709
5*48	2.85961	3.58633	2.72302	1.97907	2.63416	2.87673	2.22434	3.31678	3.19627	2.75581	2.62967	2.93709	2.66347	2.21125	2.63289	2.67985	2.55472	2.44221	2.84035	1.82304	1.64819	2.1375	1.61452	2.03679	3.0472	2.35428	1.30524	1.98485	0.920925	2.02709	1.92284	2.78809	2.19874	2.18695	1.84208	1.57593	1.61134	0.916185	1.70178	1.44407	1.79657	1.46248	1.34099	2.28665	1.7476	2.96642	1.61964	1.05908	1.90502
6*52	1.59705	1.7201	2.01174	1.03932	1.92836	2.56904	1.6286	2.19993	2.0287	2.36549	1.94353	1.40373	2.04485	1.22779	2.10255	1.65453	1.99536	1.2113	1.77179	2.35888	0.753886	1.07971	0.629994	1.3745	1.12363	1.60306	1.23303	1.8002	0.629123	1.91062	1.07264	1.80907	1.41018	1.14002	1.18314	0.851977	1.34096	0.935153	1.28991	0.760738	1.13981	0.688904	0.540863	0.900069	0.819512	1.40282	1.48924	1.06202	1.44643
6*53	1.26124	1.43804	1.50617	1.18871	1.67484	1.99111	1.7965	1.56997	1.40123	1.14911	1.26858	1.45165	2.62513	1.02093	1.87312	0.832345	1.9726	1.37094	1.60184	0.776189	0.466542	0.888723	0.695536	1.22259	0.660933	0.851429	0.788741	1.16078	0.572428	1.32971	1.03196	1.06247	0.624645	0.706461	1.21957	0.588596	1.0421	0.384414	0.995184	0.732021	0.998629	0.916473	0.858667	0.77171	0.863974	0.911764	1.17052	1.02419	1.09163
6*54	1.25746	2.02874	1.72666	1.23178	2.21447	2.15747	1.76878	2.24787	2.15603	2.37297	2.45046	1.75876	2.54227	1.61151	2.46609	1.42519	1.42024	1.15807	1.93155	0.977882	0.72335	0.87147	0.650542	0.809599	1.34402	1.9668	1.75419	1.15534	0.733309	1.41194	0.984345	1.78986	1.06386	0.893155	1.15303	0.824711	1.60704	0.868515	0.915141	0.608508	1.04726	1.16904	0.722302	1.09238	1.00839	1.95252	1.93394	1.84298	1.07098
6*55	1.46335	1.8638	1.99479	1.21055	1.96807	2.10773	1.79177	2.53872	2.18432	2.11221	2.00165	2.35602	2.14034	1.47518	1.9942	1.48246	1.20328	0.979695	1.25858	1.23773	0.809751	2.23023	1.36189	1.78734	1.60656	2.80444	1.79274	1.65577	0.782484	1.79093	1.22392	2.60649	2.08807	1.57289	1.72197	1.27844	1.60778	1.45722	0.943039	0.535312	1.33798	0.880766	0.904631	1.6712	1.47346	2.46252	1.28873	0.942223	1.76667
6*56	2.54573	3.19981	2.37827	1.8098	4.16945	3.42092	2.55226	2.51244	3.0449	3.93069	3.53138	3.81669	3.99435	1.42818	2.51031	1.41455	2.24756	1.7282	2.28383	0.985513	1.20753	1.76069	1.59644	2.3781	2.06649	2.69829	2.27448	1.31979	1.04369	1.60693	1.12156	1.58234	1.25377	1.90099	0.994876	1.06244	1.52198	0.680829	1.38935	1.00466	1.44176	1.43298	1.64934	1.76212	1.59575	2.62439	3.13398	2.38617	2.10782
6*57	2.67196	2.24656	2.67378	5.21613	2.74387	2.49082	3.99712	3.1203	3.03176	2.48648	2.91661	2.73278	2.7886	5.02103	3.2798	4.53278	4.0347	3.92513	3.6776	2.79231	5.15481	2.03874	3.72821	1.89415	2.50789	2.36547	3.14554	2.36121	8.59423	3.75161	3.57175	2.4679	3.38807	1.56741	2.1785	4.7115	3.0666	4.56173	2.8642	3.39029	2.54574	6.51796	6.73915	4.23914	5.2417	2.57256	3.20833	1.92847	3.70617
7*61	3.51343	2.97868	2.10757	4.57858	2.22747	1.7294	3.0584	2.76111	2.5521	2.34218	2.45341	2.91967	3.47339	5.57498	2.40115	3.42625	2.77584	2.6996	2.34926	3.33687	3.34768	3.93736	4.1984	2.91677	3.28511	3.77641	3.63567	1.80665	5.80622	1.66712	3.13326	2.66951	2.3665	1.91198	4	3.54145	2.05594	2.8701	2.25777	2.45693	1.96766	6.84581	5.09125	4.62663	5.02992	2.80178	2.0824	2.40731	2.36853
7*62	2.72573	4.84484	1.64263	2.13286	3.59779	2.09045	2.37185	2.18214	4.28158	1.66368	1.64595	1.61346	2.10263	1.90578	2.06502	1.90376	3.20638	2.84152	1.9775	1.88404	1.77863	2.13157	1.88077	2.89253	5.08758	4.40841	4.39484	1.67149	1.12153	1.28564	1.72737	1.74197	1.62254	1.28218	1.78902	1.22802	1.49897	0.876748	2.24997	1.78334	1.15265	1.57843	1.94704	1.80785	1.6535	3.14547	3.15689	3.61067	1.8064
7*63	2.49856	3.47266	2.36394	1.89928	3.31813	2.48148	3.0424	3.38686	4.36159	2.50853	3.42415	2.82887	4.42682	2.9125	2.80308	2.41518	3.02419	2.73411	1.83384	1.69486	1.91644	3.23444	2.09857	3.02263	2.87142	4.73986	3.26311	2.21625	1.02604	2.6146	1.90284	2.37911	2.21425	1.99077	2.70754	1.88925	2.023	1.90762	1.29989	1.74489	1.03877	0.705017	2.05869	2.19077	1.74263	4.41762	3.07066	2.64641	2.03246
7*64	1.6471	4.31109	1.61396	1.15739	3.32869	1.95632	1.83551	2.35672	2.89354	2.38948	2.47251	1.80611	2.99684	1.55086	1.96077	1.13755	2.07005	1.33443	0.944767	0.875342	0.747233	2.30798	1.52759	3.35402	4.39307	6.52644	5.47931	1.77882	0.953785	1.88648	1.06404	2.25988	1.82881	1.37644	1.86885	1.11224	1.56157	0.894125	1.33246	0.816955	0.714767	0.932418	1.13119	1.52282	1.41233	4.10256	3.85978	2.09057	1.35084
7*65	4.94811	3.57866	3.03644	5.49195	3.34009	2.79679	5.25801	3.89311	3.56208	3.25939	3.39705	4.30394	4.9787	10.6171	4.46937	3.87693	7.03464	7.9161	5.20278	5.32062	9.72006	6.75269	8.10015	4.03002	5.69584	4.54716	5.2459	2.69266	7.66766	4.00803	4.33996	3.40372	4.78431	3.92405	4.33646	7.38986	4.03691	4.58322	4.70029	6.46538	3.41779	8.62518	6.4217	6.26035	7.05182	3.64607	3.85174	4.85707	5.38552
7*66	3.13413	2.53771	2.27605	2.57718	2.37742	2.4033	2.8908	3.14706	2.56806	2.46808	3.1256	2.99448	4.26272	5.13391	2.86159	2.01688	4.12959	3.74677	2.80544	1.29638	2.88795	3.09776	2.70016	1.43085	2.57409	2.68977	2.41393	1.68188	2.19061	2.21808	1.91926	2.352	2.51205	2.0524	2.79725	3.8755	2.06713	1.91426	2.52686	3.0056	1.72141	2.25469	2.59017	2.69347	2.49283	2.63468	2.0714	2.30895	2.65203
[truncated: 228 more columns]

## Sheet: NEG-Abundance Proportion
	LPC比例	PC比例	LPE比例	PE比例	PE-O比例	LPG比例	PG比例	LPI比例	PI比例	PS比例	CL比例	PA比例	FFA比例
0h	0.067114	0.232073	0.0357685	0.0856702	0.0496314	0.000853045	0.0429678	0.0147335	0.182096	0.0515671	0.0555368	0.101488	0.080501
6h	0.0512742	0.208462	0.034135	0.106689	0.0590629	0.00676592	0.0528669	0.0141934	0.159847	0.0625997	0.0564286	0.0837068	0.103968
24h	0.0613879	0.202423	0.0388678	0.0948531	0.0445583	0.00666438	0.0456401	0.0204485	0.14981	0.05399	0.0447788	0.0982255	0.138352
30h	0.0533556	0.188237	0.0400713	0.121816	0.0500216	0.00553234	0.0541078	0.0141149	0.143234	0.0747396	0.0422994	0.0865546	0.125916
48h	0.0843761	0.194542	0.0474824	0.0915821	0.0582385	0.00819939	0.0401598	0.0466988	0.156372	0.0488385	0.0407076	0.0661329	0.11667
72h	0.0844691	0.206204	0.0467416	0.111056	0.0647917	0.00266125	0.0480871	0.0172712	0.162209	0.0561896	0.0612968	0.0556666	0.0833566
144h	0.0830515	0.243006	0.0415046	0.113498	0.068175	0.000309906	0.0520716	0.0158382	0.162185	0.0527218	0.0519689	0.0576869	0.0579831

## Sheet: POS
	SM(d18:1/14:0)+H	CE(24:0)+NH4	CE(22:6)+NH4	CE(22:5)+NH4	CE(14:0)+NH4	CE(16:0)+NH4	CE(16:1)+NH4	CE(18:0)+NH4	CE(18:1)+NH4	CE(18:2)+NH4	CE(18:3)+NH4	CE(20:2)+NH4	CE(20:3)+NH4	CE(20:4)+NH4	CE(20:5)+NH4	CE(22:0)+NH4	CE(22:1)+NH4	CE(22:2)+NH4	CE(22:4)+NH4	CE(24:1)+NH4	CER(d18:1/14:0)+H	CER(d18:1/16:0)+H	CER(d18:1/18:0)+H	CER(d18:1/20:0)+H	CER(d18:1/22:0)+H	CER(d18:1/22:1)+H	CER(d18:1/24:0)+H	CER(d18:1/24:1)+H	CER(d18:1/26:0)+H	CER(d18:1/26:1)+H	CER(d18:0/22:0)+H	CER(d18:0/24:0)+H	CER(d18:0/24:1)+H	GlcCer(d18:1/16:0)+H	GlcCer(d18:1/18:0)+H	GlcCer(d18:1/20:0)+H	GlcCer(d18:1/22:0)+H	GlcCer(d18:1/24:0)+H	GlcCer(d18:1/24:1)+H	GlcCer(d18:1/26:0)+H	GlcCer(d18:0/22:0)+H	GlcCer(d18:0/24:0)+H	LacCer(d18:1/16:0)+H	LacCer(d18:0/22:0)+H	PE(P-16:0_18:2)+H	PE(P-16:0_20:4)+H	PE(P-16:0_22:4)+H	PE(P-16:0_22:5)+H	PE(P-16:0_22:6)+H
1*1	2.58767	0.815498	1.16778	1.38476	2.60763	1.98649	2.8284	1.0219	1.4782	1.40391	1.10887	1.26443	1.69198	1.22846	1.77481	1.04644	1.05845	1.22014	0.729611	1.22505	1.64457	1.32667	0.729289	0.89313	1.44128	1.76832	1.53211	1.62777	1.89269	1.97031	1.89056	1.5384	1.50818	1.19045	0.974701	0.864061	1.19304	1.28978	1.36737	1.31554	1.27007	1.52296	0.944016	1.05717	3.41728	1.98533	2.02058	1.82232	2.77282
1*2	2.18009	4.04582	1.36799	1.37806	2.43303	1.1647	3.87277	1.25407	2.04347	2.19561	1.28399	1.82071	2.55989	1.89534	1.88355	2.773	2.86402	1.3437	1.20219	3.80502	2.79372	1.98409	1.00883	1.68687	1.76349	2.25376	2.04985	2.22152	2.52068	2.01078	1.9674	1.96593	2.78476	1.69941	1.21345	1.66919	1.59088	1.54406	1.99027	1.6304	1.76142	1.49846	1.29855	1.25813	2.18097	1.91014	2.286	2.52182	2.22629
1*3	3.20315	1.74789	2.71026	2.30668	2.07622	3.07435	1.91592	2.43097	2.14036	1.97773	2.43018	1.3929	2.19833	2.38971	3.20854	1.76917	1.88511	1.86278	1.27187	1.79562	2.77311	3.01665	3.98368	2.66943	2.27029	4.14869	2.14086	3.04338	1.84549	1.95434	1.75615	2.14982	2.99459	1.99334	1.27038	1.14776	1.12819	1.2498	1.49716	1.51648	0.461944	1.76652	1.30211	1.20357	2.0512	3.93139	4.34598	3.3631	3.47359
1*4	2.40598	3.01204	2.11839	2.27703	3.33011	2.46842	3.80058	1.85195	2.5118	2.45642	2.00573	2.90915	2.88626	2.62077	3.0526	2.33793	3.38923	2.21888	1.72374	3.12782	1.54165	1.91245	0.681818	0.92464	1.57218	1.99326	2.16936	1.94822	2.34629	2.21127	1.99666	2.82924	1.82635	1.68653	1.31748	0.869115	1.52389	1.78322	1.85472	1.47126	1.34352	1.80647	2.00363	1.55374	2.45362	2.94102	1.87824	1.72376	2.80158
1*5	2.08425	1.65885	2.78364	3.59369	4.02162	2.01224	6.45836	2.24506	3.67231	3.63227	2.87408	2.65728	4.40286	3.1711	3.74202	2.51055	3.89171	3.18325	1.97696	2.90897	2.91609	3.0153	1.31039	2.07197	3.0117	2.83132	3.25104	3.22214	3.08529	2.94076	3.00102	3.16426	2.79517	2.29026	1.12661	2.15154	3.12385	3.27076	2.98686	2.4738	4.59541	3.03787	1.7213	2.88412	3.13257	2.63717	2.43493	2.58904	2.58973
1*6	2.87486	4.73755	2.02988	3.08474	2.459	3.70212	6.12344	2.62647	3.28804	2.98626	2.45284	2.94129	3.10985	2.52563	2.65045	3.70704	3.77556	2.64864	2.5819	3.94702	3.45021	3.23674	1.73234	2.24717	2.57282	2.78877	3.27969	2.94139	3.35661	2.68266	3.93203	3.65222	2.76887	2.41238	2.1368	2.14533	2.23872	2.60923	2.19222	2.26959	1.41386	2.51212	2.77846	2.05661	3.48761	3.68093	3.18718	2.96538	3.41251
2*13	2.07714	0.806387	2.77149	2.34032	2.17354	2.06868	1.46352	1.79683	1.39271	1.30908	1.60943	1.00421	2.14548	2.25848	1.92633	1.06388	0.84104	1.09878	2.00988	0.786363	1.90093	1.3548	2.59841	2.31471	1.81145	1.87259	1.54695	1.54338	1.22106	1.52745	1.66362	1.50757	1.39681	1.45981	1.16119	1.39065	1.20231	1.23985	1.14153	1.17389	1.10831	1.19048	1.34082	0.776039	1.70791	1.93697	2.81117	3.07403	2.0074
2*14	1.66243	1.89715	1.82988	2.49151	1.65278	1.73862	1.31181	4.09881	1.21782	1.16289	1.64031	1.09994	1.22973	1.40245	0.749986	5.25547	2.37357	2.13546	1.29268	1.70151	2.69943	1.85265	4.49579	2.27789	1.59184	1.5295	1.05575	1.39473	0.945489	1.15684	1.19815	0.974084	1.53801	1.98741	1.85387	1.90744	1.64594	1.50142	1.47491	1.44489	1.06416	1.66099	1.54781	0.57264	1.57604	2.90384	2.76465	2.05109	2.30372
2*15	1.53601	0.608868	3.13478	2.88358	1.14937	2.3776	1.46394	1.64666	2.12194	1.65558	1.68635	1.37471	2.72216	2.56923	2.16351	0.670115	0.807858	1.34283	2.15165	0.721117	2.90362	2.2246	3.88528	3.25238	2.83934	3.1081	2.73898	2.88829	1.85589	3.17597	2.29406	2.20899	2.96601	2.30658	2.21699	2.2234	1.94255	2.06871	2.27268	1.80028	1.50117	2.05129	2.35862	3.26865	2.27481	3.00241	2.81293	3.78795	2.08723
2*16	1.41233	0.950293	3.85961	2.49848	2.14432	2.05494	1.25483	2.61315	2.45364	1.81985	1.7255	1.39433	2.69215	2.67073	2.17132	0.952618	1.15368	1.4135	2.16015	1.10132	3.42603	2.12214	2.50283	1.95941	2.04685	1.79777	2.24026	2.63072	1.8084	2.73579	2.02212	1.93878	2.32927	2.0173	1.53212	1.81303	1.29527	1.76932	1.79375	2.04032	2.64301	1.1988	2.30215	4.13198	1.50254	2.27842	2.38661	3.3923	1.81586
2*17	3.97809	0.248642	2.86533	2.77075	2.60736	3.56355	2.01227	1.92248	1.6909	1.75059	2.12869	0.88174	2.35399	2.44393	2.59157	0.774824	0.624454	0.998762	1.3782	0.659334	1.95713	1.87979	3.90071	2.80426	2.16708	2.20081	1.74851	1.93332	1.58307	1.95668	1.85607	1.66038	1.7096	2.02301	1.54282	1.90909	1.33915	1.24693	1.2308	1.92319	1.33024	1.01264	2.1888	1.44137	2.52301	3.14293	3.05253	3.35999	3.30144
2*22	2.32682	2.35729	4.56569	3.91234	3.51347	2.71048	2.00198	5.747	2.76679	2.36692	2.70285	2.25741	2.93856	3.01727	2.2036	3.42148	2.986	3.19848	4.94982	2.6183	1.7952	3.33559	3.82711	2.75396	3.23651	2.67227	2.91662	3.27059	2.89522	3.49356	2.99642	3.18168	2.81844	3.30305	2.34264	2.20458	2.11814	2.4409	2.5524	3.43088	2.4373	2.01274	3.69304	4.47186	1.86581	3.73427	3.39728	3.49809	4.01697
2*23	1.99519	1.92553	1.12609	1.98754	0.795795	2.14965	3.13558	1.4101	1.96789	1.89679	1.38081	1.78576	2.13237	1.62752	1.49494	2.00356	2.51402	1.5929	0.829045	3.13448	1.20876	1.60164	0.907993	1.16758	1.43358	1.59874	1.83338	1.89757	1.67307	1.70929	1.34826	1.78778	1.88585	1.2638	1.62466	1.2591	1.41964	1.34325	1.32029	1.9432	1.23631	1.86327	0.927911	0.993967	0.841231	1.87145	1.93816	1.86763	1.7932
2*24	2.04509	0.981023	2.27448	2.27057	2.92104	1.61123	1.41168	2.45269	1.90422	1.52418	1.92389	1.40268	2.37921	2.4151	1.80645	1.38527	1.05612	1.45347	2.54053	1.00651	2.78869	2.34605	2.8916	2.86063	2.07979	2.26127	1.9344	2.01534	1.19676	1.57491	1.77073	1.82573	1.89522	2.46044	1.67758	1.85129	1.74398	2.07077	1.95623	1.92977	2.73324	2.15089	2.08893	1.9699	2.67669	3.39919	2.75875	3.54981	3.03988
3*25	2.50745	1.76531	2.52128	1.85909	1.93471	2.65195	1.13037	1.79363	2.2494	2.1451	1.26468	2.52472	2.10694	2.57995	3.26866	1.54543	1.88203	1.9646	2.10895	1.70564	2.66193	2.08969	1.86678	1.91928	1.67497	2.3159	1.79644	1.84337	2.31222	2.46549	1.61897	1.91569	1.79632	2.81065	2.70709	3.34233	2.08829	2.06677	2.7234	1.7492	2.53014	2.38626	1.91571	3.77447	2.39112	2.39036	1.50788	1.92731	2.5869
3*26	2.56921	1.38632	2.51096	1.9066	0.860857	2.24421	0.90004	1.38214	1.28203	1.30997	0.893753	0.717522	1.21932	1.46447	2.17196	1.50494	1.63127	0.81305	1.35115	2.02138	1.19816	2.31398	2.98941	1.70639	1.43504	2.06804	1.37205	1.54028	1.54681	1.68142	1.52297	1.56997	1.53502	1.95749	2.48549	2.06365	1.46332	1.50958	1.28183	1.55122	1.70687	1.29415	1.03082	2.53654	1.13947	1.75061	1.54362	1.56178	1.9108
3*27	3.05272	1.87973	5.14122	3.94475	2.09994	4.49105	3.08633	5.50432	6.0367	3.48596	5.49075	7.10006	2.99182	3.58165	7.86919	2.61188	5.03739	5.83001	5.41911	3.43104	2.77318	4.43577	4.87219	5.83667	5.41758	5.84891	4.86499	6.18206	6.75862	6.35923	5.29409	4.91567	6.17312	3.18201	3.19661	2.58838	3.09993	2.60984	3.17599	3.33348	4.55455	2.94304	4.63834	2.9402	2.40262	3.19038	2.36963	2.68135	3.57265
3*28	2.36781	1.57975	3.31258	2.79198	1.67639	2.7815	2.09937	3.00285	3.07927	2.66869	4.46967	3.18956	2.85684	3.18298	5.51077	1.20998	2.54087	2.43531	3.90454	2.11559	2.575	3.61497	2.62849	3.94048	3.53133	3.19709	3.16848	3.82277	3.08278	3.74915	3.42029	3.4811	3.17728	2.17037	2.20911	2.37329	2.02416	1.80869	1.91916	1.67148	3.26609	1.9786	1.6534	1.40565	1.9545	2.23165	1.87975	2.79249	2.65953
3*29	4.74341	0.236507	2.09828	1.82252	2.03059	0.859274	1.07718	1.81675	1.75158	1.16092	1.42581	1.17887	1.25961	1.43799	2.15467	0.256838	0.748331	1.13704	1.45241	0.286257	3.07955	1.8169	5.28167	3.92053	2.59185	3.21522	2.39693	2.09101	2.23964	2.13508	2.23361	2.15532	2.37291	1.64104	4.9483	3.7217	2.21977	1.72815	1.77817	1.68081	1.32009	1.7917	1.71163	1.4907	1.39177	2.27785	2.10937	2.72063	2.67136
3*30	2.19953	4.44489	2.67962	2.28534	2.85383	1.5537	1.29755	1.61918	2.61162	3.4539	2.26091	2.80063	2.72551	2.76817	2.60955	3.85352	5.21398	3.41052	2.64917	5.80291	3.47216	3.76751	2.67321	4.36217	3.96875	3.72931	3.66451	3.52439	3.9262	4.02193	3.92287	3.81882	3.78404	3.7695	3.19276	4.06811	3.89252	3.70216	3.52578	3.93979	4.52502	4.13859	3.73416	3.07692	3.53975	2.50635	2.75787	2.67451	2.69164
4*34	2.1709	0.182976	3.55839	2.94983	1.17863	0.210261	1.6834	0.564898	1.6057	2.87371	2.843	1.78333	2.67292	3.21084	3.79249	1.73034	1.17002	1.85507	2.89674	0.378337	2.73856	3.62996	1.83301	4.1036	3.66394	3.32053	3.60037	3.11614	3.42268	2.98763	2.62139	3.39223	3.29032	3.28165	2.76595	2.95431	3.08239	2.60254	2.90417	2.79328	1.85353	2.77486	3.52046	3.01721	2.65984	3.35862	3.18803	3.30693	2.74805
4*35	4.79621	1.89455	5.87804	6.29866	4.79454	5.04042	3.25789	10.1406	5.58469	3.77473	4.74559	3.85569	2.38873	2.46908	2.30135	3.48382	3.48705	5.20775	7.39475	2.02945	2.00579	5.08168	12.9301	7.99109	5.69265	4.99871	5.5149	5.04673	5.6609	6.28709	5.97155	5.36741	5.04002	8.88564	11.2827	9.6763	6.62625	7.02869	8.3848	9.75654	6.04752	7.70827	6.10625	8.27801	1.24307	2.53149	2.36233	2.1494	2.75029
4*36	2.05222	1.62666	2.82018	2.36886	2.41362	2.70837	1.51771	2.23962	2.48662	3.55927	3.83928	3.09456	2.29938	2.77502	3.32522	1.14313	1.72848	3.016	2.70699	1.82921	1.6668	1.80903	1.49396	2.52637	2.27271	2.5892	2.2215	1.98921	3.6402	3.94217	2.29983	2.52206	1.66345	2.80354	2.59556	2.88248	2.79365	2.78826	2.07055	3.45465	2.75147	3.00364	3.58353	0.996654	2.24294	2.81696	2.12015	1.70443	2.10051
4*37	2.39594	1.17757	1.78003	1.92718	3.1166	2.54513	1.04098	2.12277	1.95122	2.53085	2.25223	2.92777	1.82372	1.90686	2.17515	1.21007	1.97765	3.01725	2.49041	1.55553	1.87577	2.12156	2.04268	1.63848	2.01411	1.89153	1.65059	2.05845	1.88592	2.09892	2.4966	2.11626	1.95494	2.81981	2.91673	2.66201	3.71592	3.69416	3.76443	4.56027	1.9433	3.49571	1.70962	2.38314	2.7593	1.92356	2.1296	1.93102	1.75309
4*38	1.93502	0.253319	2.12331	1.79563	1.48209	1.8886	0.904503	1.00132	1.28337	1.52587	0.980489	0.95631	1.35434	1.64349	1.54114	0.307091	0.507087	0.987839	1.36252	0.285558	1.22742	1.70013	2.13036	1.45292	1.22272	1.36831	1.14398	1.11871	0.874526	0.666011	1.35684	1.0341	1.24378	2.066	2.18353	2.41324	1.65636	1.5541	1.51973	1.17376	1.94087	1.37292	1.05735	1.45831	0.988513	2.11274	1.93938	1.59376	1.60319
4*39	0.596186	1.29082	0.323873	0.314157	0.430111	0.297066	0.26437	0.30444	0.391477	0.468742	0.619586	0.30123	0.327665	0.416852	0.215632	1.2529	0.79548	0.264091	0.403322	1.1361	0.925174	1.48023	2.07462	1.07288	0.653335	0.866502	0.443814	0.578365	0.315787	0.372087	0.462616	0.430671	0.497701	1.42612	2.4839	1.84612	1.19778	1.33065	1.47085	1.25527	1.0907	1.31418	0.48582	0.97972	0.513317	0.475459	0.759625	0.733878	0.348191
5*43	2.32417	2.94143	1.88333	3.14342	1.92738	2.96543	6.70282	1.73728	2.78309	2.52427	2.87832	2.68067	3.05116	2.6341	2.09213	2.32094	2.65406	2.18095	2.7687	2.19456	2.03027	1.71843	0.688078	1.18735	1.84024	1.87046	2.18473	1.87404	2.16684	1.64801	2.34608	2.69306	1.59388	2.07266	1.36091	1.44762	2.47928	2.49705	2.51935	1.6942	3.13122	3.07447	2.46277	1.04152	2.52437	1.69966	2.34221	2.13076	1.75513
5*44	1.66469	0.603676	2.15065	1.33451	0.830664	0.784131	0.858508	1.97053	1.35985	1.68865	1.63381	1.3219	1.29772	1.34327	1.30364	0.774732	1.00502	1.40184	1.32702	0.595295	1.69888	1.72425	1.82706	1.62759	1.3858	1.39295	1.3353	1.36531	0.741653	0.657975	1.23852	1.24525	1.47976	1.96093	2.77682	2.09131	1.80302	1.68579	1.91661	1.11341	1.64768	1.79153	1.57987	2.85806	2.25701	1.61838	1.5496	1.77014	1.37812
5*45	2.17438	1.39502	2.75866	1.81641	2.39387	3.9484	1.14611	2.18069	1.91279	2.67879	2.10096	2.19711	2.2581	2.78892	2.35056	1.39053	1.28893	2.02989	2.00001	0.992943	2.01082	2.67481	1.84511	1.72484	1.73535	1.57073	1.64196	1.76564	1.54243	1.26431	1.69539	2.05974	1.80576	1.8772	2.3314	1.53737	1.60874	1.58713	1.19764	1.1754	2.00447	1.15807	3.15755	2.2767	2.38764	3.32621	2.39283	2.36811	1.93301
5*46	3.81539	5.58248	2.673	3.59955	5.00842	5.26562	4.31439	3.62905	3.18463	3.71397	4.38251	3.61544	3.79185	3.58649	3.53802	5.06149	4.47506	3.5894	3.68505	5.96985	4.47048	4.24486	1.67686	2.80327	3.99652	3.48192	3.95627	3.58667	3.86996	3.79202	3.45706	3.8859	3.5161	3.92568	3.33221	3.45575	4.1793	4.45864	3.53386	4.52405	3.43404	3.26524	4.82814	4.00629	3.98519	2.45669	2.7871	3.38225	3.52866
5*47	2.71206	4.32946	1.82487	2.34205	1.96066	1.07442	3.00732	2.20974	2.81302	2.81541	2.96107	3.88417	2.89689	2.81026	2.1251	3.83301	3.9982	3.35607	2.70035	5.02865	5.11885	3.58422	2.01602	2.70846	3.31273	2.82957	3.67039	3.0025	3.41549	3.11124	4.04032	3.6001	2.93872	2.94645	2.34581	2.97783	3.44528	3.53987	3.29791	3.10833	3.81356	4.27834	4.73104	2.01227	3.20339	2.21896	2.47679	2.6231	2.32791
5*48	2.23278	1.82812	2.53501	2.01247	2.38884	0.210017	1.09144	0.522388	1.61241	3.00705	3.23822	1.86834	2.55727	3.23975	2.61714	1.61703	1.6695	1.50427	2.54997	1.73791	3.57115	3.73331	2.28947	2.60101	3.3221	2.96835	3.56205	3.14199	3.28575	3.61016	3.16491	3.4837	3.83837	4.46104	5.24386	3.89992	4.90123	5.05341	4.94211	4.88204	3.85191	5.25109	5.45334	2.55726	3.93584	2.35751	2.36503	2.58683	2.46782
6*52	1.57031	0.726209	1.85457	1.17923	0.994143	1.27173	0.450837	1.52153	1.33235	1.51567	1.19344	1.41993	1.20204	1.45078	1.47526	0.91486	0.858019	1.74227	1.81716	0.696532	1.44423	1.43919	1.3451	1.41526	1.30231	1.06343	1.06677	1.17046	0.746955	0.460821	1.3151	1.00158	1.48081	1.4533	1.535	1.69901	1.78426	1.63521	1.60737	1.02119	1.56167	1.24106	1.36961	1.97188	3.05514	1.71844	2.16491	1.6574	1.53542
6*53	1.25064	7.12064	2.34809	1.8458	0.718	2.06994	1.93818	5.02937	2.66418	2.22207	3.08331	2.28383	2.37439	2.5582	1.42748	6.0947	2.91944	2.25397	2.17719	3.13086	2.59531	2.13324	2.1583	2.17316	2.03051	2.02528	1.82248	1.94458	1.62954	0.930063	2.32121	1.6246	1.55224	1.73348	2.42604	2.2285	2.34475	2.17994	2.03252	1.23793	2.4678	2.12087	2.13414	2.73113	1.44326	1.11701	1.34206	1.46414	1.24504
6*54	1.06014	1.5048	0.545273	0.530255	0.67831	0.672486	0.283973	0.717669	0.582808	0.875006	0.809945	0.610461	0.829058	0.905417	0.563474	1.48377	0.755535	0.644169	0.428459	1.06643	0.66283	0.721049	0.312758	0.389644	0.698214	0.600127	0.76596	0.542766	0.662541	0.512473	0.56888	0.652065	0.673253	0.681795	0.564855	0.479283	0.723866	0.729332	0.68234	0.368615	0.708784	0.80847	0.573961	2.15329	1.80729	1.25166	1.421	1.7782	1.4472
6*55	1.20195	2.52882	2.14725	1.64269	2.5145	2.87799	1.09396	2.79189	2.7141	3.09767	2.43484	3.69304	2.40188	2.70735	2.52857	2.36853	2.54319	3.65938	2.5644	2.50919	1.31311	2.07357	1.19836	1.56511	1.76457	1.52124	1.83431	1.77138	1.9699	2.04558	1.72793	1.8728	2.03283	1.80402	1.92652	1.45531	1.89243	1.95414	2.05431	2.2571	1.72762	2.03788	2.70865	3.29437	3.3703	1.89826	1.55331	1.79932	2.11614
6*56	1.34905	8.09079	2.19022	1.95417	2.33604	2.15504	1.25944	2.69624	2.22982	2.63193	2.99337	2.95166	2.34572	3.06285	1.73631	6.31004	4.06139	2.47758	3.25257	6.66872	1.54486	0.951753	1.17749	1.31659	1.22282	0.855912	1.23475	1.14185	1.88204	1.66135	1.20038	1.16512	1.36627	1.57857	2.71318	2.56593	3.55851	4.07104	3.02564	3.29827	3.34418	3.81409	2.99061	2.0553	1.4472	2.04422	1.41022	1.08674	2.14168
6*57	2.64994	1.64309	1.01272	1.89781	1.84291	2.61102	5.36437	0.22039	2.19995	2.01802	1.71531	1.70421	2.01349	1.89388	1.50965	2.09385	1.93712	1.89046	1.24923	1.94513	2.63726	1.34057	0.738083	1.17535	1.61487	1.93509	1.89596	1.67724	2.14754	1.8883	1.865	2.01391	1.80074	1.56425	0.989743	1.65334	1.91772	1.59362	1.72783	1.74266	0.902993	1.69837	1.16955	1.03585	2.45674	1.80832	1.86214	1.75627	2.15129
7*61	1.42325	4.00724	0.51076	1.19968	2.44275	1.38365	3.50697	1.02648	2.25074	1.31447	1.08216	2.72795	1.68574	1.12557	0.6381	3.56649	3.66481	2.82577	1.44107	3.39732	1.2096	1.08175	0.478568	0.893815	1.34982	1.70464	2.07617	1.55234	1.94107	1.92811	1.53265	1.67667	1.5027	0.780849	0.636985	0.61627	0.922613	1.14186	0.95721	0.894235	1.00403	1.12391	0.724424	1.52065	1.45925	1.30061	1.77926	1.45492	1.25273
7*62	1.50105	1.14391	1.21434	1.30819	2.12113	1.35049	1.01106	1.55802	1.43878	1.31794	1.98721	0.931108	1.21716	1.3625	1.08041	1.58974	1.10724	1.47961	1.47448	1.01811	1.22625	0.875193	1.42975	1.25715	1.37423	0.534294	0.906018	1.01937	0.714726	0.4122	1.38003	0.699758	0.942052	1.15713	1.66455	2.98328	2.92869	2.24579	2.46832	1.62258	2.00517	2.02354	1.49121	1.28421	2.98567	1.83837	2.7031	2.04839	1.88455
7*63	2.04554	1.2559	0.682572	0.830233	1.17466	1.38291	0.506133	1.57739	1.21727	1.84366	1.92588	2.33713	1.15976	1.19956	1.07658	1.26162	1.49017	2.86217	1.63113	1.31999	0.562487	0.701803	0.569429	0.593496	0.941169	0.70824	0.797582	0.803746	0.790699	0.583868	1.12559	0.83544	1.09173	0.955542	0.645898	1.28578	1.33583	1.11411	1.29473	0.738763	1.69388	0.832885	0.737578	1.8359	2.31717	1.69808	2.19249	1.77903	2.2795
7*64	1.48444	1.38615	1.65397	1.87408	2.5014	2.71093	0.778958	1.63112	2.68318	3.29221	3.58919	3.90377	2.44662	2.59805	2.44602	1.57781	2.02568	4.13541	3.54663	1.41596	1.34952	1.47682	0.981484	1.90591	2.31791	0.836274	1.74801	1.81917	1.10572	0.702249	2.3366	1.39543	1.67333	1.75133	1.62627	1.9521	2.47267	1.98054	2.04435	1.85299	3.0973	1.62276	2.04086	2.58518	2.21225	1.60111	2.51399	1.52231	1.65965
7*65	3.50371	5.75203	1.47734	4.05156	7.10788	4.85526	7.57286	2.93792	4.11666	3.79113	2.51665	4.19374	4.81186	3.43951	1.92555	5.41884	5.03503	3.65921	2.59669	5.83995	5.23996	3.14555	1.37826	3.43882	4.61366	4.7222	5.56245	5.02197	5.93635	5.68394	4.82255	5.44453	4.95317	3.20567	2.01782	2.62847	3.00668	3.47438	3.27372	4.0039	3.48873	2.84397	3.18287	2.56252	2.32986	1.8334	2.12864	1.72879	2.32112
7*66	2.28081	4.64898	1.1843	1.99325	2.30122	2.45596	1.7979	1.43162	1.94061	2.5563	1.43455	3.05875	2.18968	1.62045	1.21056	2.54075	2.57116	2.65745	1.85161	3.35719	1.3155	1.30906	0.617261	0.86828	1.19999	1.14486	1.66254	1.30913	1.55851	1.24054	0.946913	1.54622	2.01223	1.18254	0.903129	1.04544	1.32926	1.20655	1.27411	1.18111	1.68487	1.52602	1.02061	2.24036	1.90493	1.29161	2.27309	1.71951	1.53662
[truncated: 438 more columns]

## Sheet: POS-Abundance Proportion
	SM比例	CE比例	CER比例	GlcCer比例	LacCer比例	PE-P比例	TAG比例	DAG比例
0h	0.00346187	0.0576496	0.0392304	0.0191209	0.00398253	0.0739557	0.711111	0.0914878
6h	0.00445718	0.0734123	0.0540986	0.0301352	0.00787318	0.0924394	0.629069	0.108516
24h	0.0046061	0.0782096	0.0657521	0.0353877	0.00749928	0.0790906	0.602	0.127455
30h	0.00304595	0.0521638	0.043711	0.038549	0.00703242	0.0631738	0.681106	0.111218
48h	0.00227536	0.0409373	0.0282009	0.0224862	0.00586532	0.0484451	0.745102	0.106688
72h	0.00178796	0.0525117	0.0240435	0.0215342	0.00542346	0.0495736	0.740051	0.105075
144h	0.00152133	0.0323526	0.0149047	0.0130299	0.00295495	0.0419376	0.821145	0.0721541
