# Supplementary material for: Time-Course Lipidomics of Ornithine-Induced Severe Acute Pancreatitis Model Reveals the Free Fatty Acids Centered Lipids Dysregulation Characteristics
Source: Metabolites. 2023 Sep 5;13(9):993. doi: 10.3390/metabo13090993 (PMC10647642; doi:10.3390/metabo13090993)
Supplement: Supplementary file 1 [file metabolites-13-00993-s001.zip › Table S7-counts and proportion in serum.xlsx]

## Sheet: COUNTS
	TOTAL	cluster1	cluster2	cluster3	no change
LPC	19	9	2	1	7
PC	59	21	5	2	31
LPE	11	2			9
PE	29	3	3	0	23
PE-O	16	2	1		13
LPG	1			1
PG	13				13
LPI	6				6
PI	45	9	1	1	34
PS	16			1	15
CL	14	2			12
PA	22	1		11	10
FFA	26			4	22
SM	1				1
CE	19	3			16
CER	13			2	11
GlcCer	9			2	7
LacCer	2				2
PE-P	21			1	20
TAG	381	1	268	2	110
DAG	41	17	2	3	19

## Sheet: PROPORTION
	cluster1	cluster2	cluster3	no change	TOTAL
LPC	0.473684	0.105263	0.0526316	0.368421	1
PC	0.355932	0.0847458	0.0338983	0.525424	1
LPE	0.181818	0	0	0.818182	1
PE	0.103448	0.103448	0	0.793103	1
PE-O	0.125	0.0625	0	0.8125	1
LPG	0	0	1	0	1
PG	0	0	0	1	1
LPI	0	0	0	1	1
PI	0.2	0.0222222	0.0222222	0.755556	1
PS	0	0	0.0625	0.9375	1
CL	0.142857	0	0	0.857143	1
PA	0.0454545	0	0.5	0.454545	1
FFA	0	0	0.153846	0.846154	1
SM	0	0	0	1	1
CE	0.157895	0	0	0.842105	1
CER	0	0	0.153846	0.846154	1
GlcCer	0	0	0.222222	0.777778	1
LacCer	0	0	0	1	1
PE-P	0	0	0.047619	0.952381	1
TAG	0.00262467	0.703412	0.00524934	0.288714	1
DAG	0.414634	0.0487805	0.0731707	0.463415	1
